# Supplementary material for: De novo Assembly, Characterization of Immature Seed Transcriptome and Development of Genic-SSR Markers in Black Gram [Vigna mungo (L.) Hepper]
Source: PLoS One. 2015 Jun 4;10(6):e0128748. doi: 10.1371/journal.pone.0128748 (PMC4456365; doi:10.1371/journal.pone.0128748)
Supplement: S1 Table — (XLS) [file pone.0128748.s004.xls]

## Sheet: Biological_process
CDS IDs	GO biological process
CDS_3	protein phosphorylation; cell wall macromolecule catabolic process;
CDS_5	proteolysis;
CDS_6	oxylipin biosynthetic process; oxidation-reduction process;
CDS_13	protein folding;
CDS_15	transcription, DNA-dependent;
CDS_16	pathogenesis;
CDS_21	potassium ion transmembrane transport;
CDS_25	vesicle-mediated transport;
CDS_27	translational elongation;
CDS_31	translation;
CDS_32	cell redox homeostasis; glycerol ether metabolic process;
CDS_33	inositol catabolic process; oxidation-reduction process;
CDS_34	protein phosphorylation;
CDS_35	small GTPase mediated signal transduction; protein transport;
CDS_37	oxylipin biosynthetic process; oxidation-reduction process;
CDS_41	translation;
CDS_44	carbohydrate metabolic process;
CDS_47	oxidation-reduction process;
CDS_49	metabolic process;
CDS_50	small GTPase mediated signal transduction; protein transport;
CDS_52	phosphorylation;
CDS_57	negative regulation of peptidase activity; proteolysis;
CDS_60	translational elongation; GTP catabolic process;
CDS_61	translational elongation; GTP catabolic process; response to cadmium ion;
CDS_62	allantoin catabolic process;
CDS_63	intracellular protein transport; ER to Golgi vesicle-mediated transport;
CDS_71	protein phosphorylation;
CDS_74	proteolysis involved in cellular protein catabolic process;
CDS_75	proteolysis involved in cellular protein catabolic process;
CDS_76	proteolysis involved in cellular protein catabolic process;
CDS_78	L-phenylalanine biosynthetic process;
CDS_82	proteolysis involved in cellular protein catabolic process;
CDS_86	metabolic process;
CDS_89	oxidation-reduction process;
CDS_91	metabolic process;
CDS_92	metabolic process;
CDS_96	tetrahydrofolate interconversion; oxidation-reduction process; methionine metabolic process;
CDS_103	oxidation-reduction process; response to oxidative stress;
CDS_104	oxidation-reduction process;
CDS_110	metabolic process;
CDS_114	protein folding;
CDS_121	glutathione biosynthetic process;
CDS_127	oxidation-reduction process;
CDS_128	protein transport;
CDS_129	pyruvate metabolic process;
CDS_130	pyruvate metabolic process;
CDS_133	translational elongation;
CDS_137	transmembrane transport; ATP catabolic process;
CDS_139	metabolic process;
CDS_143	protein phosphorylation; signal transduction;
CDS_144	mRNA catabolic process; RNA processing;
CDS_148	regulation of transcription, DNA-dependent;
CDS_149	cysteine biosynthetic process from serine;
CDS_157	transmembrane transport;
CDS_158	response to stress;
CDS_161	oxylipin biosynthetic process; oxidation-reduction process;
CDS_164	oxidation-reduction process;
CDS_165	negative regulation of peptidase activity;
CDS_166	proteolysis;
CDS_167	protein folding; response to stress;
CDS_169	protein phosphorylation;
CDS_172	translation;
CDS_174	protein polymerization; GTP catabolic process;
CDS_182	phospholipid biosynthetic process; inositol biosynthetic process;
CDS_185	glycolysis;
CDS_190	protein folding;
CDS_195	purine nucleobase metabolic process; urate catabolic process; nodulation; oxidation-reduction process;
CDS_199	transcription, DNA-dependent;
CDS_201	response to oxidative stress; oxidation-reduction process;
CDS_202	mRNA polyadenylation;
CDS_210	carbohydrate metabolic process;
CDS_212	oxidation-reduction process;
CDS_213	putrescine biosynthetic process;
CDS_216	oxidation-reduction process;
CDS_221	RNA metabolic process;
CDS_223	protein transport;
CDS_227	transport;
CDS_229	glycine catabolic process;
CDS_230	protein retention in ER lumen;
CDS_231	GTP catabolic process;
CDS_234	one-carbon metabolic process;
CDS_238	regulation of transcription, DNA-dependent;
CDS_250	nitrogen fixation; glutamine biosynthetic process;
CDS_251	negative regulation of nucleotide metabolic process; negative regulation of catalytic activity;
CDS_252	translation;
CDS_261	oxidation-reduction process;
CDS_262	pyrimidine nucleotide biosynthetic process;
CDS_263	pyrimidine nucleotide biosynthetic process;
CDS_268	tryptophan biosynthetic process;
CDS_279	tricarboxylic acid cycle; glyoxylate cycle;
CDS_281	ribosomal large subunit biogenesis; translational initiation; mature ribosome assembly;
CDS_287	tricarboxylic acid cycle; glyoxylate cycle;
CDS_293	proteolysis;
CDS_294	protein phosphorylation;
CDS_296	regulation of transcription, DNA-dependent; auxin mediated signaling pathway;
CDS_301	intracellular protein transport;
CDS_306	defense response to fungus; lipid transport; defense response to Gram-positive bacterium; killing of cells of other organism;
CDS_309	allantoin catabolic process;
CDS_312	RNA-dependent DNA replication;
CDS_318	glucose metabolic process; oxidation-reduction process;
CDS_320	protein folding; response to heat;
CDS_326	protein folding; protein peptidyl-prolyl isomerization;
CDS_328	response to desiccation;
CDS_332	metabolic process;
CDS_333	transport;
CDS_334	transport;
CDS_335	transport;
CDS_336	transport;
CDS_342	cellulose biosynthetic process;
CDS_344	oxidation-reduction process;
CDS_351	regulation of transcription, DNA-dependent;
CDS_355	oligopeptide transport;
CDS_357	proteolysis;
CDS_359	nodulation; biosynthetic process; sucrose metabolic process;
CDS_360	protein folding; response to stress;
CDS_361	biosynthetic process;
CDS_365	cellular process; proteolysis;
CDS_372	translation;
CDS_375	response to stress; regulation of transcription, DNA-dependent;
CDS_376	RNA metabolic process;
CDS_387	glutamate metabolic process;
CDS_388	protein phosphorylation;
CDS_390	protein folding; protein peptidyl-prolyl isomerization;
CDS_391	translational initiation; RNA metabolic process;
CDS_394	D-xylose metabolic process; pentose-phosphate shunt;
CDS_399	transmembrane transport;
CDS_402	protein import into peroxisome matrix; negative regulation of transcription, DNA-dependent;
CDS_407	oxidation-reduction process;
CDS_410	translation;
CDS_414	translational elongation;
CDS_416	oxidation-reduction process;
CDS_421	translation;
CDS_423	intracellular protein transport;
CDS_428	ubiquitin-dependent protein catabolic process;
CDS_432	mRNA processing;
CDS_434	intracellular protein transport;
CDS_435	oxidation-reduction process;
CDS_438	translational elongation;
CDS_445	mRNA processing;
CDS_446	signal transduction by phosphorylation; phosphorelay signal transduction system;
CDS_447	carbohydrate metabolic process;
CDS_452	nitrate assimilation; oxidation-reduction process;
CDS_454	protein phosphorylation;
CDS_457	phagocytosis;
CDS_462	protein folding; protein peptidyl-prolyl isomerization;
CDS_468	negative regulation of catalytic activity;
CDS_471	protein folding;
CDS_473	protein phosphorylation;
CDS_490	transmembrane transport;
CDS_493	intra-Golgi vesicle-mediated transport;
CDS_494	protein phosphorylation;
CDS_495	oxidation-reduction process;
CDS_498	protein retention in ER lumen; protein transport;
CDS_499	cellular glucan metabolic process;
CDS_506	metabolic process;
CDS_508	transport; cytochrome complex assembly; ATP catabolic process;
CDS_509	transport;
CDS_510	mRNA processing;
CDS_511	protein phosphorylation;
CDS_513	carbohydrate metabolic process;
CDS_520	oxidation-reduction process;
CDS_525	defense response to fungus; killing of cells of other organism;
CDS_527	sulfate reduction; cell redox homeostasis;
CDS_539	RNA-dependent DNA replication; proteolysis; DNA integration;
CDS_540	vesicle-mediated transport; intracellular protein transport;
CDS_541	vesicle-mediated transport; intracellular protein transport;
CDS_544	response to stress; protein phosphorylation;
CDS_546	biosynthetic process;
CDS_547	biosynthetic process;
CDS_551	glycogen biosynthetic process; starch biosynthetic process;
CDS_552	protein phosphorylation; signal transduction;
CDS_556	proteolysis;
CDS_560	S-adenosylmethioninamine biosynthetic process; spermine biosynthetic process; spermidine biosynthetic process;
CDS_563	DNA replication;
CDS_564	regulation of ARF GTPase activity;
CDS_565	protein folding;
CDS_573	transport;
CDS_577	RNA processing;
CDS_581	translation;
CDS_586	acetyl-CoA biosynthetic process from pyruvate;
CDS_587	translation;
CDS_588	protein ADP-ribosylation;
CDS_590	proteasomal ubiquitin-dependent protein catabolic process; nucleotide-excision repair;
CDS_591	proteasomal ubiquitin-dependent protein catabolic process; nucleotide-excision repair;
CDS_595	proteolysis;
CDS_596	regulation of transcription, DNA-dependent;
CDS_600	cellular metabolic process;
CDS_612	proteolysis;
CDS_613	peroxisome fission;
CDS_619	transmembrane transport; potassium ion transport;
CDS_620	negative regulation of protein localization to cell surface; negative regulation of growth hormone receptor signaling pathway; negative regulation of hydrolase activity; negative regulation of JAK-STAT cascade; multicellular organismal development; energy reserve metabolic process; cholesterol metabolic process;
CDS_621	nucleosome assembly;
CDS_623	glycolysis;
CDS_626	intracellular protein transport; glucose catabolic process;
CDS_631	gene silencing by RNA;
CDS_632	protein dephosphorylation;
CDS_633	protein phosphorylation;
CDS_634	translational frameshifting; peptidyl-lysine modification to hypusine; positive regulation of translational termination; positive regulation of translational elongation;
CDS_636	metabolic process;
CDS_638	oxidation-reduction process;
CDS_642	translation;
CDS_645	metabolic process;
CDS_652	ATP biosynthetic process; cation transport; ATP catabolic process;
CDS_655	metabolic process;
CDS_656	translational initiation;
CDS_659	phosphorylation; CDP-choline pathway;
CDS_664	translation;
CDS_666	oxidation-reduction process;
CDS_670	regulation of transcription, DNA-dependent; auxin mediated signaling pathway;
CDS_671	tRNA thio-modification;
CDS_672	intracellular transport;
CDS_674	isoprenoid biosynthetic process;
CDS_675	transport;
CDS_678	nitrogen fixation; glutamine biosynthetic process;
CDS_679	protein refolding;
CDS_680	proteolysis;
CDS_684	iron-sulfur cluster assembly;
CDS_685	vesicle-mediated transport; intracellular protein transport;
CDS_688	mitochondrial electron transport, ubiquinol to cytochrome c;
CDS_690	protein folding;
CDS_691	oxidation-reduction process;
CDS_693	proteolysis; lipid metabolic process;
CDS_694	small GTPase mediated signal transduction; protein transport;
CDS_695	oxidation-reduction process;
CDS_697	glucose catabolic process; protein targeting; nucleosome assembly;
CDS_698	glucose catabolic process; protein targeting; nucleosome assembly;
CDS_709	lipid transport;
CDS_715	response to stress;
CDS_717	oxidation-reduction process;
CDS_720	cellular metabolic process; galactose metabolic process;
CDS_721	ATP hydrolysis coupled proton transport;
CDS_732	translation;
CDS_733	translation;
CDS_738	vesicle-mediated transport; intracellular protein transport;
CDS_739	tryptophan biosynthetic process;
CDS_740	protein methylation;
CDS_742	carbohydrate phosphorylation; galactose metabolic process;
CDS_755	mRNA splicing, via spliceosome;
CDS_756	metabolic process;
CDS_757	oxidation-reduction process;
CDS_758	oxidation-reduction process;
CDS_759	proteolysis;
CDS_760	translation;
CDS_761	translational initiation; RNA metabolic process;
CDS_764	CDP-diacylglycerol biosynthetic process;
CDS_768	vesicle-mediated transport; intracellular protein transport;
CDS_769	proteolysis;
CDS_773	regulation of transcription, DNA-dependent;
CDS_774	protein dephosphorylation;
CDS_776	abscisic acid biosynthetic process; oxidation-reduction process;
CDS_778	regulation of transcription, DNA-dependent;
CDS_779	cellular iron ion homeostasis; iron ion transport; oxidation-reduction process;
CDS_780	defense response;
CDS_781	protein refolding;
CDS_784	transmembrane transport;
CDS_792	protein phosphorylation;
CDS_795	proteolysis;
CDS_796	signal peptide processing;
CDS_797	methylation;
CDS_798	carbohydrate transport;
CDS_799	primary metabolic process;
CDS_801	proton transport;
CDS_803	transport;
CDS_804	small GTPase mediated signal transduction;
CDS_806	regulation of transcription, DNA-dependent;
CDS_807	response to biotic stimulus; defense response;
CDS_811	cell redox homeostasis;
CDS_814	translation;
CDS_820	response to desiccation;
CDS_821	translation;
CDS_826	UDP-glucuronate biosynthetic process; oxidation-reduction process;
CDS_833	cell redox homeostasis; glycerol ether metabolic process;
CDS_834	protein transport;
CDS_837	ATP hydrolysis coupled proton transport;
CDS_838	negative regulation of peptidase activity;
CDS_840	protein phosphorylation;
CDS_841	cellular metabolic process;
CDS_844	translational initiation;
CDS_846	protein retention in ER lumen;
CDS_849	multicellular organismal development; protein ubiquitination; ubiquitin-dependent protein catabolic process;
CDS_853	protein import into nucleus;
CDS_856	response to stress;
CDS_857	tricarboxylic acid cycle; isocitrate metabolic process; glyoxylate cycle;
CDS_858	regulation of transcription, DNA-dependent;
CDS_864	regulation of photoperiodism, flowering;
CDS_865	translation;
CDS_867	RNA metabolic process;
CDS_868	calcium ion transmembrane transport;
CDS_872	translation;
CDS_878	biosynthetic process;
CDS_879	biosynthetic process;
CDS_880	small GTPase mediated signal transduction;
CDS_883	oxylipin biosynthetic process; oxidation-reduction process;
CDS_886	oxidation-reduction process;
CDS_889	protein folding;
CDS_890	protein folding; response to heat;
CDS_895	protein geranylgeranylation;
CDS_901	transcription, DNA-dependent;
CDS_903	translation;
CDS_905	carbohydrate metabolic process;
CDS_910	metabolic process;
CDS_912	metabolic process;
CDS_919	pentose-phosphate shunt;
CDS_922	translation;
CDS_926	translation;
CDS_927	translation;
CDS_929	nucleotide-excision repair;
CDS_943	translation;
CDS_944	translation;
CDS_948	carbohydrate metabolic process;
CDS_949	transport;
CDS_955	translation;
CDS_958	metal ion transport;
CDS_959	phosphorylation; terpenoid biosynthetic process;
CDS_964	translation;
CDS_965	methylation; phospholipid metabolic process;
CDS_968	protein phosphorylation;
CDS_970	protein import into peroxisome matrix;
CDS_973	GTP catabolic process;
CDS_974	vesicle-mediated transport; small GTPase mediated signal transduction; protein transport;
CDS_975	small GTPase mediated signal transduction;
CDS_976	metabolic process;
CDS_980	oxidation-reduction process;
CDS_984	metabolic process;
CDS_985	metabolic process;
CDS_988	cell redox homeostasis;
CDS_990	cell redox homeostasis;
CDS_1004	regulation of primary metabolic process; RNA metabolic process; regulation of cellular metabolic process; regulation of macromolecule metabolic process; gene expression;
CDS_1007	metabolic process;
CDS_1015	ribosome biogenesis;
CDS_1016	vesicle-mediated transport; intracellular protein transport;
CDS_1018	oxidation-reduction process;
CDS_1025	cell redox homeostasis;
CDS_1028	intracellular protein transport;
CDS_1029	respiratory electron transport chain;
CDS_1031	nucleoside metabolic process;
CDS_1032	small GTPase mediated signal transduction; nucleocytoplasmic transport; GTP catabolic process; intracellular protein transport;
CDS_1033	transport;
CDS_1035	protein transport;
CDS_1044	translation;
CDS_1046	oxidation-reduction process;
CDS_1050	transport;
CDS_1053	oxidation-reduction process;
CDS_1054	cell redox homeostasis;
CDS_1055	mitochondrial electron transport, ubiquinol to cytochrome c;
CDS_1058	oxidation-reduction process; response to oxidative stress;
CDS_1061	response to stress;
CDS_1063	regulation of cellular process; transcription, DNA-dependent;
CDS_1069	transmembrane transport;
CDS_1070	phosphorylation;
CDS_1072	metabolic process;
CDS_1073	ubiquinone biosynthetic process;
CDS_1077	cellular metabolic process;
CDS_1082	GTP metabolic process;
CDS_1083	regulation of translational initiation;
CDS_1084	proteolysis involved in cellular protein catabolic process;
CDS_1093	malate metabolic process; cellular carbohydrate metabolic process; oxidation-reduction process;
CDS_1095	protein polymerization; GTP catabolic process; microtubule-based process;
CDS_1097	proteolysis;
CDS_1104	translation;
CDS_1107	transmembrane transport;
CDS_1108	protein transport;
CDS_1120	ribosome biogenesis; translational elongation;
CDS_1126	translation;
CDS_1127	oxidation-reduction process; histidine biosynthetic process;
CDS_1128	regulation of transcription, DNA-dependent;
CDS_1133	translation;
CDS_1134	translation;
CDS_1138	transcription, DNA-dependent;
CDS_1139	protein phosphorylation;
CDS_1142	proteolysis;
CDS_1146	carbohydrate metabolic process;
CDS_1149	sucrose biosynthetic process; dephosphorylation;
CDS_1150	oxidation-reduction process;
CDS_1154	protein ubiquitination;
CDS_1155	hydrogen peroxide catabolic process; oxidation-reduction process;
CDS_1156	hydrogen peroxide catabolic process; oxidation-reduction process;
CDS_1163	S-adenosylmethionine biosynthetic process; one-carbon metabolic process;
CDS_1164	S-adenosylmethionine biosynthetic process; one-carbon metabolic process;
CDS_1165	S-adenosylmethionine biosynthetic process; one-carbon metabolic process;
CDS_1166	translation;
CDS_1168	DNA replication;
CDS_1179	translation;
CDS_1180	protein phosphorylation;
CDS_1181	ubiquitin-dependent protein catabolic process;
CDS_1182	regulation of transcription, DNA-dependent;
CDS_1198	macromolecule metabolic process; primary metabolic process;
CDS_1200	phosphatidylinositol phosphorylation;
CDS_1201	protein phosphorylation;
CDS_1202	translation;
CDS_1205	translation;
CDS_1206	translation;
CDS_1209	negative regulation of catalytic activity; proteolysis;
CDS_1211	flavonoid biosynthetic process;
CDS_1212	regulation of transcription, DNA-dependent;
CDS_1213	ribosome biogenesis;
CDS_1214	nuclear-transcribed mRNA catabolic process, nonsense-mediated decay;
CDS_1220	regulation of transcription, DNA-dependent;
CDS_1227	oxidation-reduction process;
CDS_1235	iron-sulfur cluster assembly;
CDS_1240	metabolic process;
CDS_1256	guanosine tetraphosphate metabolic process;
CDS_1257	cobalamin biosynthetic process;
CDS_1265	protein phosphorylation;
CDS_1266	protein phosphorylation;
CDS_1267	protein phosphorylation;
CDS_1269	lipid catabolic process;
CDS_1277	vesicle-mediated transport;
CDS_1281	regulation of nitrogen utilization; regulation of catalytic activity; regulation of transcription, DNA-dependent;
CDS_1285	translation;
CDS_1286	translation;
CDS_1289	translation;
CDS_1296	ATP hydrolysis coupled proton transport;
CDS_1297	intracellular signal transduction; regulation of transcription, DNA-dependent; signal transduction by phosphorylation; ethylene mediated signaling pathway;
CDS_1300	protein folding; protein peptidyl-prolyl isomerization;
CDS_1302	transmembrane transport; ATP catabolic process;
CDS_1303	RNA metabolic process;
CDS_1307	mitochondrial proton-transporting ATP synthase complex assembly;
CDS_1314	metal ion transport; transmembrane transport;
CDS_1315	metabolic process;
CDS_1317	oxidation-reduction process; negative regulation of transcription, DNA-dependent;
CDS_1318	cellular process;
CDS_1328	electron transport chain; tricarboxylic acid cycle;
CDS_1337	protein transport;
CDS_1340	magnesium ion transport;
CDS_1343	metabolic process;
CDS_1347	proteolysis; negative regulation of endopeptidase activity;
CDS_1351	actin cytoskeleton organization;
CDS_1355	glycogen biosynthetic process; starch biosynthetic process;
CDS_1357	proteolysis involved in cellular protein catabolic process;
CDS_1358	oxidation-reduction process;
CDS_1360	glutathione biosynthetic process;
CDS_1366	branched-chain amino acid biosynthetic process; oxidation-reduction process;
CDS_1367	mitosis;
CDS_1371	lipid metabolic process; oxidation-reduction process;
CDS_1372	glutamate biosynthetic process; proline catabolic process; oxidation-reduction process;
CDS_1373	glutamate biosynthetic process; proline catabolic process; oxidation-reduction process;
CDS_1374	cellular metabolic process; galactose metabolic process;
CDS_1377	pantothenate biosynthetic process; methylation;
CDS_1384	protein phosphorylation;
CDS_1389	transmembrane transport; regulation of anion transport;
CDS_1391	positive regulation of ATPase activity;
CDS_1399	protein phosphorylation;
CDS_1400	maintenance of fidelity involved in DNA-dependent DNA replication; mismatch repair;
CDS_1402	vesicle-mediated transport; intracellular protein transport;
CDS_1407	translational elongation;
CDS_1409	oxidation-reduction process;
CDS_1411	regulation of transcription, DNA-dependent;
CDS_1420	cutin biosynthetic process; flower development;
CDS_1421	glutamate biosynthetic process; oxidation-reduction process;
CDS_1424	protein metabolic process;
CDS_1427	translation;
CDS_1428	proteolysis;
CDS_1429	photosynthetic electron transport in photosystem II;
CDS_1430	protein phosphorylation;
CDS_1432	transmembrane transport;
CDS_1442	rRNA processing; methylation; tRNA processing;
CDS_1443	rRNA processing; methylation; tRNA processing;
CDS_1444	protein metabolic process;
CDS_1446	regulation of transcription, DNA-dependent; auxin mediated signaling pathway;
CDS_1450	ATP hydrolysis coupled proton transport;
CDS_1459	fatty acid biosynthetic process; oxidation-reduction process;
CDS_1461	cellular metabolic process;
CDS_1465	regulation of transcription, DNA-dependent;
CDS_1468	glucose catabolic process; protein targeting; nucleosome assembly;
CDS_1476	intracellular signal transduction;
CDS_1477	metabolic process;
CDS_1484	cell wall macromolecule catabolic process;
CDS_1485	oxidation-reduction process; response to oxidative stress;
CDS_1487	protein phosphorylation;
CDS_1488	ubiquitin-dependent protein catabolic process;
CDS_1490	transcription, DNA-dependent;
CDS_1497	oxidation-reduction process;
CDS_1501	carbohydrate metabolic process; chitin catabolic process; cell wall macromolecule catabolic process;
CDS_1503	vesicle-mediated transport;
CDS_1504	defense response;
CDS_1511	small GTPase mediated signal transduction; protein transport;
CDS_1512	small GTPase mediated signal transduction; protein transport;
CDS_1513	methylation;
CDS_1515	transmembrane transport;
CDS_1516	vesicle-mediated transport; intracellular protein transport;
CDS_1518	transmembrane transport; regulation of anion transport;
CDS_1523	ribosome biogenesis;
CDS_1524	transport;
CDS_1527	transmembrane transport;
CDS_1528	translation;
CDS_1531	ATP catabolic process; cation transport;
CDS_1533	transmembrane transport;
CDS_1537	glucan biosynthetic process;
CDS_1538	glucan biosynthetic process;
CDS_1539	ubiquitin-dependent protein catabolic process;
CDS_1540	ubiquitin-dependent protein catabolic process;
CDS_1543	rRNA processing;
CDS_1545	protein phosphorylation;
CDS_1546	translation;
CDS_1547	protein catabolic process; proteolysis;
CDS_1548	fatty acid biosynthetic process;
CDS_1551	cellular metabolic process;
CDS_1552	fatty acid biosynthetic process; oxidation-reduction process;
CDS_1554	response to stress;
CDS_1559	response to stress;
CDS_1563	cellular carbohydrate metabolic process;
CDS_1566	tricarboxylic acid cycle;
CDS_1567	translation;
CDS_1573	translation;
CDS_1575	protein dephosphorylation;
CDS_1581	protein refolding;
CDS_1584	vesicle-mediated transport; intracellular protein transport;
CDS_1586	small GTPase mediated signal transduction;
CDS_1587	small GTPase mediated signal transduction;
CDS_1590	oxidation-reduction process;
CDS_1594	translation;
CDS_1595	translation;
CDS_1597	small GTPase mediated signal transduction; cellular homeostasis; GTP catabolic process;
CDS_1604	nodulation;
CDS_1608	protein phosphorylation;
CDS_1610	protein kinase C-activating G-protein coupled receptor signaling pathway; intracellular signal transduction;
CDS_1611	ubiquitin-dependent protein catabolic process;
CDS_1612	ATP catabolic process; detoxification of arsenic-containing substance;
CDS_1613	photosystem II stabilization;
CDS_1629	cellular metabolic process;
CDS_1642	small GTPase mediated signal transduction;
CDS_1643	metal ion transport; superoxide metabolic process; oxidation-reduction process;
CDS_1650	protein secretion;
CDS_1654	transport;
CDS_1656	metabolic process;
CDS_1660	arginine catabolic process; spermidine biosynthetic process; putrescine biosynthetic process;
CDS_1664	intracellular signal transduction; methylation;
CDS_1665	translation;
CDS_1670	translation;
CDS_1671	vesicle-mediated transport;
CDS_1674	carbohydrate metabolic process;
CDS_1677	ATP hydrolysis coupled proton transport;
CDS_1678	phosphorelay signal transduction system; red, far-red light phototransduction; protein-tetrapyrrole linkage; regulation of transcription, DNA-dependent; protein-chromophore linkage; detection of visible light; signal transduction by phosphorylation;
CDS_1679	oxidation-reduction process;
CDS_1680	threonyl-tRNA aminoacylation;
CDS_1681	vesicle-mediated transport;
CDS_1682	drug transmembrane transport;
CDS_1685	metal ion transport;
CDS_1686	protein folding;
CDS_1687	small GTPase mediated signal transduction;
CDS_1693	glycolysis;
CDS_1694	positive regulation of DNA-dependent transcription, elongation;
CDS_1698	ceramide metabolic process;
CDS_1700	lipid catabolic process; phosphatidylcholine metabolic process;
CDS_1702	protein folding;
CDS_1706	phosphorelay signal transduction system; intracellular signal transduction; regulation of transcription, DNA-dependent; signal transduction by phosphorylation;
CDS_1707	sulfide oxidation, using siroheme sulfite reductase; plastid DNA packaging; negative regulation of transcription, DNA-dependent; regulation of DNA replication;
CDS_1716	translation;
CDS_1718	regulation of transcription, DNA-dependent; histone acetylation;
CDS_1720	translation;
CDS_1721	protein phosphorylation;
CDS_1722	protein folding;
CDS_1723	translation;
CDS_1725	ATP biosynthetic process; cation transport; ATP catabolic process;
CDS_1727	electron transport chain;
CDS_1733	proteolysis;
CDS_1735	mitotic cell cycle; response to DNA damage stimulus; DNA recombination; DNA topological change; DNA ligation; positive regulation of apoptotic process; chromosome segregation; cell cycle process; positive regulation of retroviral genome replication; apoptotic chromosome condensation; DNA replication;
CDS_1736	cyanate metabolic process;
CDS_1739	ubiquitin-dependent protein catabolic process;
CDS_1747	translation;
CDS_1751	oxidation-reduction process;
CDS_1752	lysyl-tRNA aminoacylation;
CDS_1753	pseudouridine synthesis; tRNA processing;
CDS_1754	metabolic process;
CDS_1756	protein folding; response to heat;
CDS_1757	malate metabolic process; oxidation-reduction process;
CDS_1762	response to stress;
CDS_1768	ubiquitin-dependent protein catabolic process;
CDS_1777	cell communication;
CDS_1778	RNA-dependent DNA replication; proteolysis; DNA integration;
CDS_1782	proteolysis;
CDS_1784	electron transport chain;
CDS_1787	metabolic process;
CDS_1790	transmembrane transport; magnesium ion transport;
CDS_1791	phosphorylation; glycolysis;
CDS_1792	translation;
CDS_1795	GTP catabolic process;
CDS_1803	transcription, DNA-dependent;
CDS_1804	methylation;
CDS_1805	N-terminal protein myristoylation;
CDS_1809	response to stress; oxidation-reduction process;
CDS_1811	metal ion transport;
CDS_1817	actin cytoskeleton organization;
CDS_1818	regulation of transcription, DNA-dependent;
CDS_1819	sulfate transport; transmembrane transport;
CDS_1823	metabolic process;
CDS_1827	DNA-dependent transcription, initiation;
CDS_1828	protein transport;
CDS_1833	peptide biosynthetic process; translational elongation;
CDS_1837	translation;
CDS_1838	cation transport;
CDS_1841	DNA repair;
CDS_1842	ribosome biogenesis; translational elongation;
CDS_1843	carbohydrate metabolic process;
CDS_1845	translational initiation;
CDS_1847	photosynthesis;
CDS_1849	metal ion transport; transmembrane transport;
CDS_1850	oxidation-reduction process;
CDS_1853	protein glycosylation;
CDS_1856	carbohydrate metabolic process;
CDS_1860	cell redox homeostasis;
CDS_1861	transcription, DNA-dependent;
CDS_1867	metabolic process;
CDS_1873	ATP catabolic process;
CDS_1874	translational initiation;
CDS_1875	translational initiation;
CDS_1878	oxidation-reduction process;
CDS_1882	response to stress;
CDS_1885	autophagy;
CDS_1890	regulation of transcription, DNA-dependent; regulation of cyclin-dependent protein serine/threonine kinase activity;
CDS_1894	isoleucine biosynthetic process;
CDS_1902	carbohydrate metabolic process;
CDS_1904	ubiquitin-dependent protein catabolic process;
CDS_1910	metabolic process;
CDS_1915	carbohydrate transport;
CDS_1918	regulation of transcription, DNA-dependent;
CDS_1919	translational elongation;
CDS_1921	proteolysis;
CDS_1925	regulation of transcription, DNA-dependent;
CDS_1926	metabolic process;
CDS_1927	nitrogen compound metabolic process;
CDS_1930	carbohydrate metabolic process;
CDS_1935	signal transduction;
CDS_1939	transmembrane transport;
CDS_1940	DNA metabolic process;
CDS_1942	carboxylic acid metabolic process;
CDS_1943	oxidation-reduction process;
CDS_1945	recognition of pollen; protein phosphorylation;
CDS_1951	oxidation-reduction process;
CDS_1952	translation;
CDS_1953	translation;
CDS_1957	mannose metabolic process;
CDS_1959	protein phosphorylation;
CDS_1960	protein phosphorylation;
CDS_1963	translation;
CDS_1964	vesicle-mediated transport;
CDS_1969	protein catabolic process;
CDS_1970	metal ion transport;
CDS_1971	transmembrane transport;
CDS_1972	cellular amino acid metabolic process; biosynthetic process;
CDS_1974	oxidation-reduction process;
CDS_1977	metabolic process;
CDS_1978	fructose 6-phosphate metabolic process; glycolysis;
CDS_1980	aromatic amino acid family biosynthetic process;
CDS_1982	tyrosine biosynthetic process; oxidation-reduction process;
CDS_1983	tyrosine biosynthetic process; oxidation-reduction process;
CDS_1985	translation;
CDS_1986	translation;
CDS_1995	anaphase-promoting complex-dependent proteasomal ubiquitin-dependent protein catabolic process; regulation of mitotic metaphase/anaphase transition;
CDS_2000	superoxide metabolic process; oxidation-reduction process;
CDS_2010	translation;
CDS_2011	phosphorylation;
CDS_2013	translation;
CDS_2014	clathrin coat assembly;
CDS_2015	translation;
CDS_2021	ATP hydrolysis coupled proton transport; ATP synthesis coupled proton transport; ATP catabolic process;
CDS_2026	proteolysis;
CDS_2028	cellular metabolic process;
CDS_2029	translation;
CDS_2032	transport;
CDS_2037	small GTPase mediated signal transduction;
CDS_2040	oxidation-reduction process;
CDS_2043	nucleosome assembly;
CDS_2056	chitin catabolic process; defense response; polysaccharide catabolic process; cell wall macromolecule catabolic process;
CDS_2067	proline biosynthetic process; oxidation-reduction process;
CDS_2069	cellular metabolic process;
CDS_2074	oxidation-reduction process;
CDS_2078	proteolysis;
CDS_2081	transmembrane transport;
CDS_2084	cellular protein modification process;
CDS_2088	protein phosphorylation;
CDS_2091	MAPK cascade; protein phosphorylation;
CDS_2092	intracellular protein transport; ER to Golgi vesicle-mediated transport;
CDS_2093	protein phosphorylation;
CDS_2095	protein phosphorylation;
CDS_2096	protein phosphorylation;
CDS_2097	small GTPase mediated signal transduction; protein transport;
CDS_2101	regulation of transcription, DNA-dependent;
CDS_2105	pyrimidine nucleobase catabolic process;
CDS_2106	pyrimidine nucleobase catabolic process;
CDS_2113	metabolic process;
CDS_2114	nucleosome assembly;
CDS_2116	ATP synthesis coupled proton transport;
CDS_2118	proteolysis;
CDS_2119	methylation; cellular protein modification process;
CDS_2120	glucan biosynthetic process;
CDS_2121	regulation of transcription from RNA polymerase II promoter;
CDS_2124	methionine biosynthetic process;
CDS_2128	metabolic process;
CDS_2129	regulation of transcription, DNA-dependent;
CDS_2131	protein phosphorylation;
CDS_2134	protein glycosylation;
CDS_2137	protein ubiquitination;
CDS_2138	protein ubiquitination;
CDS_2140	metabolic process;
CDS_2145	translational initiation;
CDS_2149	translation;
CDS_2153	GTP catabolic process;
CDS_2157	glucan biosynthetic process;
CDS_2160	phenylalanyl-tRNA aminoacylation;
CDS_2161	regulation of response to red or far red light; cellular iron ion homeostasis; iron-sulfur cluster assembly;
CDS_2162	regulation of response to red or far red light; cellular iron ion homeostasis; iron-sulfur cluster assembly;
CDS_2163	metabolic process;
CDS_2165	gibberellin biosynthetic process; oxidation-reduction process;
CDS_2167	DNA integration; DNA recombination;
CDS_2168	metabolic process;
CDS_2171	intracellular protein transport;
CDS_2174	ethanol oxidation;
CDS_2175	oxidation-reduction process;
CDS_2182	oxidation-reduction process;
CDS_2183	oxidation-reduction process;
CDS_2186	protein folding;
CDS_2188	ATP synthesis coupled electron transport;
CDS_2189	regulation of transcription, DNA-dependent;
CDS_2191	metabolic process;
CDS_2192	tRNA thio-modification;
CDS_2193	nucleoside metabolic process; adenine salvage;
CDS_2194	protein phosphorylation;
CDS_2197	SRP-dependent cotranslational protein targeting to membrane;
CDS_2200	pathogenesis;
CDS_2201	oxidation-reduction process;
CDS_2204	tricarboxylic acid cycle; photosynthesis; carbon fixation;
CDS_2207	oxidation-reduction process;
CDS_2209	oxidation-reduction process;
CDS_2211	photoperiodism; protein phosphorylation; regulation of transcription, DNA-dependent; inflorescence development;
CDS_2213	proteolysis;
CDS_2215	lysine biosynthetic process via diaminopimelate;
CDS_2217	carbohydrate metabolic process;
CDS_2219	DNA replication;
CDS_2220	proteolysis;
CDS_2221	purine ribonucleoside salvage; AMP biosynthetic process;
CDS_2228	signal transduction;
CDS_2229	mRNA processing;
CDS_2237	oxidation-reduction process;
CDS_2240	carbohydrate metabolic process; cellular metabolic process;
CDS_2243	regulation of transcription, DNA-dependent;
CDS_2247	protein catabolic process; regulation of transcription, DNA-dependent;
CDS_2252	histone H4 acetylation; DNA repair; histone H2A acetylation; chromatin remodeling;
CDS_2253	histone H4 acetylation; DNA repair; histone H2A acetylation; chromatin remodeling;
CDS_2254	nucleocytoplasmic transport; intracellular protein transport;
CDS_2256	protein ubiquitination;
CDS_2258	drug transmembrane transport;
CDS_2259	misfolded or incompletely synthesized protein catabolic process;
CDS_2264	RNA methylation; rRNA processing;
CDS_2270	carbohydrate metabolic process;
CDS_2271	CTP biosynthetic process; red, far-red light phototransduction; nucleoside diphosphate phosphorylation; GTP biosynthetic process; UTP biosynthetic process;
CDS_2274	ATP synthesis coupled proton transport;
CDS_2275	intracellular protein transport;
CDS_2279	oxidation-reduction process; response to oxidative stress;
CDS_2281	cellular protein modification process; lipoate biosynthetic process;
CDS_2292	protein phosphorylation;
CDS_2295	protein phosphorylation;
CDS_2297	DNA modification;
CDS_2301	translation;
CDS_2307	transmembrane transport;
CDS_2309	photosynthesis;
CDS_2311	metabolic process;
CDS_2316	Arp2/3 complex-mediated actin nucleation;
CDS_2320	cell redox homeostasis;
CDS_2321	protein phosphorylation;
CDS_2323	metal ion transport;
CDS_2327	translation;
CDS_2328	regulation of transcription, DNA-dependent; histone acetylation;
CDS_2332	cell communication;
CDS_2334	regulation of transcription, DNA-dependent;
CDS_2335	regulation of transcription, DNA-dependent; auxin mediated signaling pathway;
CDS_2339	signal transduction; regulation of transcription, DNA-dependent;
CDS_2340	signal transduction; regulation of transcription, DNA-dependent;
CDS_2342	transcription, DNA-dependent;
CDS_2349	transmembrane transport;
CDS_2350	ATP catabolic process;
CDS_2351	carbohydrate metabolic process;
CDS_2353	mRNA splicing, via spliceosome;
CDS_2354	mRNA splicing, via spliceosome;
CDS_2358	protein processing; response to heat;
CDS_2361	protein ubiquitination;
CDS_2368	protein phosphorylation;
CDS_2369	glucose metabolic process; oxidation-reduction process;
CDS_2371	glutaminyl-tRNA aminoacylation;
CDS_2373	response to stress;
CDS_2375	regulation of translational fidelity;
CDS_2384	metabolic process;
CDS_2391	transport;
CDS_2392	transport;
CDS_2394	tetrahydrofolate biosynthetic process;
CDS_2395	pollen germination; calcium-mediated signaling; regulation of photomorphogenesis;
CDS_2400	oxidation-reduction process;
CDS_2406	ATP synthesis coupled electron transport;
CDS_2411	branched-chain amino acid biosynthetic process; oxidation-reduction process;
CDS_2418	rRNA processing;
CDS_2421	RNA processing;
CDS_2422	vesicle-mediated transport; intracellular protein transport;
CDS_2425	autophagy;
CDS_2426	protein dephosphorylation;
CDS_2431	malate metabolic process; tricarboxylic acid cycle; cellular carbohydrate metabolic process;
CDS_2433	ATP synthesis coupled proton transport;
CDS_2436	proteolysis; oxidation-reduction process; response to oxidative stress;
CDS_2441	cell redox homeostasis;
CDS_2449	translation;
CDS_2451	protein phosphorylation;
CDS_2453	steroid biosynthetic process; oxidation-reduction process;
CDS_2454	translational elongation;
CDS_2466	ATP synthesis coupled proton transport;
CDS_2467	protein phosphorylation; regulation of transcription, DNA-dependent; signal transduction;
CDS_2469	translation;
CDS_2470	translation;
CDS_2473	nucleosome assembly;
CDS_2479	response to stimulus; RNA-dependent DNA replication; proteolysis; DNA integration;
CDS_2486	translation;
CDS_2488	protein phosphorylation;
CDS_2493	protein phosphorylation;
CDS_2494	nucleosome assembly;
CDS_2495	amino acid transmembrane transport;
CDS_2501	translation;
CDS_2507	metabolic process;
CDS_2508	oxidation-reduction process; amine metabolic process;
CDS_2510	oxidation-reduction process;
CDS_2511	protein dephosphorylation;
CDS_2513	translational initiation;
CDS_2520	translation;
CDS_2523	biosynthetic process;
CDS_2526	regulation of signal transduction;
CDS_2527	translation;
CDS_2528	negative regulation of catalytic activity;
CDS_2530	metabolic process;
CDS_2532	transcription, DNA-dependent;
CDS_2536	defense response; response to water deprivation; protein folding; response to salt stress; heat acclimation; flower development; protein stabilization; cellular response to calcium ion; leaf development;
CDS_2539	response to stress;
CDS_2546	translation;
CDS_2547	translation;
CDS_2552	translation;
CDS_2553	translation;
CDS_2554	assembly of spliceosomal tri-snRNP;
CDS_2558	mRNA splicing, via spliceosome;
CDS_2561	peptidyl-tyrosine dephosphorylation;
CDS_2566	transport;
CDS_2569	transcription, DNA-dependent;
CDS_2571	cellular protein modification process;
CDS_2573	cellulose biosynthetic process;
CDS_2579	oxidation-reduction process; UMP biosynthetic process;
CDS_2581	'de novo' IMP biosynthetic process;
CDS_2584	cell redox homeostasis;
CDS_2594	protein folding; response to heat;
CDS_2595	ATP hydrolysis coupled proton transport;
CDS_2596	protein folding;
CDS_2598	ubiquitin-dependent protein catabolic process;
CDS_2599	translation;
CDS_2605	tricarboxylic acid cycle; cellular carbohydrate metabolic process;
CDS_2606	cysteine biosynthetic process from serine;
CDS_2608	extracellular polysaccharide biosynthetic process; nucleotide-sugar metabolic process;
CDS_2614	transmembrane transport;
CDS_2619	tricarboxylic acid cycle; cellular carbohydrate metabolic process;
CDS_2620	transport;
CDS_2621	NADP biosynthetic process; NAD metabolic process;
CDS_2623	translation;
CDS_2624	fatty acid biosynthetic process;
CDS_2631	oxidation-reduction process;
CDS_2634	translation;
CDS_2639	cell redox homeostasis; glycerol ether metabolic process;
CDS_2641	isoprenoid biosynthetic process;
CDS_2649	signal transduction;
CDS_2650	metabolic process;
CDS_2655	oxidation-reduction process;
CDS_2660	7-methylguanosine mRNA capping; peptidyl-tyrosine dephosphorylation;
CDS_2661	root hair cell tip growth; phosphatidylinositol-mediated signaling; phosphatidylinositol biosynthetic process; pollen tube growth; phosphatidylinositol phosphorylation;
CDS_2666	retrograde vesicle-mediated transport, Golgi to ER;
CDS_2671	nucleoside diphosphate phosphorylation; UTP biosynthetic process; GTP biosynthetic process; CTP biosynthetic process;
CDS_2673	arginine biosynthetic process via ornithine;
CDS_2674	protein phosphorylation;
CDS_2676	protein phosphorylation;
CDS_2681	carbohydrate metabolic process;
CDS_2682	apoptotic process;
CDS_2683	transmembrane transport;
CDS_2684	response to cold; translational elongation;
CDS_2689	small GTPase mediated signal transduction; protein transport;
CDS_2690	cell morphogenesis;
CDS_2691	transmembrane transport;
CDS_2694	histidine biosynthetic process;
CDS_2700	oxidation-reduction process;
CDS_2703	biosynthetic process;
CDS_2704	oxidation-reduction process;
CDS_2708	transcription, DNA-dependent;
CDS_2709	translation;
CDS_2710	translation;
CDS_2714	protoporphyrinogen IX biosynthetic process;
CDS_2717	oxidation-reduction process; response to oxidative stress;
CDS_2718	intracellular protein transport;
CDS_2719	vesicle-mediated transport; intracellular protein transport;
CDS_2721	proteolysis;
CDS_2727	glucose metabolic process; oxidation-reduction process;
CDS_2729	sulfate assimilation;
CDS_2732	phosphorylation;
CDS_2737	protein phosphorylation;
CDS_2738	metabolic process;
CDS_2740	(1->3)-beta-D-glucan biosynthetic process;
CDS_2742	translation;
CDS_2746	small GTPase mediated signal transduction;
CDS_2754	translation;
CDS_2758	metabolic process;
CDS_2762	DNA restriction-modification system; C-5 methylation of cytosine;
CDS_2763	fatty acid beta-oxidation;
CDS_2764	oxidation-reduction process;
CDS_2768	proteolysis;
CDS_2769	methylation;
CDS_2772	vesicle-mediated transport; intracellular protein transport;
CDS_2774	translation;
CDS_2779	histone H4 deacetylation; regulation of transcription, DNA-dependent; histone H3 deacetylation;
CDS_2780	oxidation-reduction process;
CDS_2782	proteolysis;
CDS_2786	carbohydrate metabolic process;
CDS_2787	oxidation-reduction process;
CDS_2788	transmembrane transport;
CDS_2791	protein phosphorylation;
CDS_2794	signal peptide processing;
CDS_2795	proteolysis;
CDS_2797	transmembrane transport;
CDS_2799	translational termination;
CDS_2800	translational termination;
CDS_2803	protein metabolic process;
CDS_2804	oxidation-reduction process;
CDS_2811	oxidation-reduction process;
CDS_2812	protein phosphorylation;
CDS_2813	metabolic process;
CDS_2815	metabolic process;
CDS_2820	phosphorylation; glycolysis;
CDS_2821	glucose catabolic process;
CDS_2822	positive regulation of Rab GTPase activity;
CDS_2825	mRNA processing;
CDS_2827	proteolysis;
CDS_2828	electron transport chain;
CDS_2829	cellular aromatic compound metabolic process;
CDS_2833	protein transport;
CDS_2834	regulation of transcription, DNA-dependent;
CDS_2837	carbohydrate phosphorylation; galactose metabolic process;
CDS_2841	metabolic process;
CDS_2855	oxidation-reduction process;
CDS_2856	gluconeogenesis;
CDS_2857	translational initiation;
CDS_2858	translational initiation;
CDS_2862	nucleosome assembly;
CDS_2863	tRNA aminoacylation for protein translation;
CDS_2864	translational initiation;
CDS_2865	translational initiation;
CDS_2869	phosphorylation;
CDS_2875	leucine catabolic process;
CDS_2877	metabolic process;
CDS_2878	endocytosis;
CDS_2879	endocytosis;
CDS_2883	metabolic process;
CDS_2885	glycolysis;
CDS_2887	protein phosphorylation;
CDS_2890	translational initiation;
CDS_2896	protein metabolic process;
CDS_2897	protein phosphorylation;
CDS_2901	ATP hydrolysis coupled proton transport;
CDS_2906	carbohydrate metabolic process;
CDS_2907	vesicle-mediated transport;
CDS_2913	nitrogen compound metabolic process;
CDS_2915	metabolic process;
CDS_2917	biosynthetic process; sucrose metabolic process;
CDS_2924	intracellular protein transport;
CDS_2925	translation;
CDS_2926	DNA duplex unwinding;
CDS_2930	cell redox homeostasis; glycerol ether metabolic process;
CDS_2931	translation;
CDS_2932	translation;
CDS_2933	amino acid transmembrane transport;
CDS_2936	translational elongation; GTP catabolic process;
CDS_2941	protein folding;
CDS_2943	glutamine metabolic process; 'de novo' IMP biosynthetic process;
CDS_2951	protein transport; autophagy;
CDS_2952	fatty acid biosynthetic process;
CDS_2956	oxidation-reduction process;
CDS_2960	metabolic process;
CDS_2961	calcium ion transmembrane transport;
CDS_2962	carboxylic acid metabolic process;
CDS_2963	mitotic cell cycle; mitotic recombination; sister chromatid segregation; DNA-dependent DNA replication; resolution of meiotic recombination intermediates; embryonic cleavage; DNA topological change; DNA ligation; positive regulation of apoptotic process; phosphatidylinositol-mediated signaling; positive regulation of retroviral genome replication; apoptotic chromosome condensation; positive regul…
CDS_2968	cell redox homeostasis;
CDS_2974	metabolic process;
CDS_2980	metabolic process;
CDS_2981	translation;
CDS_2987	translation;
CDS_2989	metal ion transport;
CDS_2992	carbohydrate metabolic process;
CDS_2996	transmembrane transport;
CDS_2997	regulation of transcription, DNA-dependent;
CDS_3000	transport;
CDS_3003	protein folding;
CDS_3004	drug transmembrane transport;
CDS_3008	glycolipid transport;
CDS_3009	primary metabolic process; macromolecule metabolic process;
CDS_3012	methylation;
CDS_3014	transmembrane transport;
CDS_3015	glycolysis;
CDS_3017	rRNA processing;
CDS_3020	biosynthetic process;
CDS_3023	protein catabolic process; proteolysis;
CDS_3025	translation;
CDS_3027	MAPK cascade; protein phosphorylation;
CDS_3029	translation;
CDS_3036	metabolic process;
CDS_3040	regulation of transcription, DNA-dependent;
CDS_3041	proteasomal ubiquitin-dependent protein catabolic process; nucleotide-excision repair;
CDS_3050	translation;
CDS_3056	protein phosphorylation;
CDS_3057	transcription, DNA-dependent;
CDS_3058	transcription initiation from RNA polymerase II promoter;
CDS_3059	proline biosynthetic process; oxidation-reduction process;
CDS_3064	fatty acid biosynthetic process;
CDS_3065	translation;
CDS_3068	protein phosphorylation; ATP synthesis coupled electron transport;
CDS_3069	RNA splicing;
CDS_3070	carbohydrate metabolic process;
CDS_3075	protein folding; protein peptidyl-prolyl isomerization;
CDS_3078	malate metabolic process; oxidation-reduction process;
CDS_3079	ubiquitin-dependent protein catabolic process;
CDS_3080	protein folding; protein ubiquitination; protein peptidyl-prolyl isomerization;
CDS_3082	vesicle-mediated transport; intracellular protein transport;
CDS_3087	response to stress;
CDS_3091	transport;
CDS_3095	translation;
CDS_3101	cellular protein modification process;
CDS_3104	nucleic acid phosphodiester bond hydrolysis;
CDS_3107	translation;
CDS_3108	regulation of transcription, DNA-dependent;
CDS_3114	nucleotide-excision repair; regulation of transcription, DNA-dependent;
CDS_3119	ATP hydrolysis coupled proton transport;
CDS_3120	ATP hydrolysis coupled proton transport;
CDS_3124	glutathione biosynthetic process;
CDS_3128	multicellular organismal development; protein ubiquitination; ubiquitin-dependent protein catabolic process;
CDS_3133	carbohydrate metabolic process;
CDS_3134	respiratory electron transport chain;
CDS_3135	oxidation-reduction process;
CDS_3138	isoleucine biosynthetic process; valine biosynthetic process;
CDS_3139	transmembrane transport;
CDS_3142	superoxide metabolic process; oxidation-reduction process;
CDS_3143	metabolic process;
CDS_3148	ATP metabolic process; ATP hydrolysis coupled proton transport;
CDS_3149	intracellular protein transport; ER to Golgi vesicle-mediated transport;
CDS_3151	cellular process; proteolysis;
CDS_3152	ATP hydrolysis coupled proton transport;
CDS_3153	proteolysis;
CDS_3154	protein folding; protein peptidyl-prolyl isomerization;
CDS_3157	superoxide metabolic process; oxidation-reduction process;
CDS_3158	protein dephosphorylation;
CDS_3161	oxidation-reduction process;
CDS_3165	regulation of transcription, DNA-dependent;
CDS_3170	quinolinate biosynthetic process; NAD biosynthetic process;
CDS_3171	phospholipid biosynthetic process;
CDS_3173	protein glycosylation;
CDS_3175	ATP hydrolysis coupled proton transport;
CDS_3176	nitrogen compound metabolic process;
CDS_3178	response to stress; regulation of transcription, DNA-dependent;
CDS_3179	rRNA transcription; cell proliferation;
CDS_3181	proteolysis;
CDS_3185	ubiquitin-dependent protein catabolic process;
CDS_3186	ubiquitin-dependent protein catabolic process;
CDS_3187	tryptophan biosynthetic process;
CDS_3189	defense response;
CDS_3192	multicellular organismal development; protein ubiquitination; ubiquitin-dependent protein catabolic process;
CDS_3201	GTP catabolic process;
CDS_3202	translation;
CDS_3205	protein secretion;
CDS_3206	small GTPase mediated signal transduction;
CDS_3211	protein folding; protein peptidyl-prolyl isomerization;
CDS_3213	regulation of transcription, DNA-dependent;
CDS_3218	carbohydrate phosphorylation; galactose metabolic process;
CDS_3219	carbohydrate phosphorylation; galactose metabolic process;
CDS_3221	translational elongation;
CDS_3225	protein folding; protein peptidyl-prolyl isomerization;
CDS_3226	fatty acid biosynthetic process;
CDS_3229	protein glycosylation;
CDS_3231	amino acid transmembrane transport;
CDS_3239	protein phosphorylation; regulation of signal transduction;
CDS_3242	translation;
CDS_3243	metabolic process;
CDS_3247	translation;
CDS_3248	translation;
CDS_3251	mitochondrial electron transport, ubiquinol to cytochrome c;
CDS_3257	cellular metabolic process;
CDS_3258	translation;
CDS_3263	methylation;
CDS_3268	metabolic process;
CDS_3269	RNA processing;
CDS_3272	translation;
CDS_3273	translation;
CDS_3276	oxidation-reduction process;
CDS_3278	protein glycosylation;
CDS_3281	proteolysis involved in cellular protein catabolic process;
CDS_3285	transmembrane transport;
CDS_3287	transmembrane transport;
CDS_3288	metabolic process;
CDS_3290	oxidation-reduction process;
CDS_3300	oxidation-reduction process;
CDS_3302	transport;
CDS_3305	response to oxidative stress; oxidation-reduction process;
CDS_3306	clathrin coat assembly;
CDS_3309	electron transport chain;
CDS_3310	ATP hydrolysis coupled proton transport;
CDS_3313	peptidyl-tyrosine dephosphorylation;
CDS_3314	protein ubiquitination;
CDS_3317	iron-sulfur cluster assembly;
CDS_3318	oxidation-reduction process;
CDS_3320	plant-type cell wall organization;
CDS_3326	translational initiation; GTP catabolic process;
CDS_3332	metabolic process;
CDS_3334	protein dephosphorylation;
CDS_3335	carbohydrate transport;
CDS_3336	intracellular transport;
CDS_3347	electron transport chain;
CDS_3349	proton transport;
CDS_3356	protein dephosphorylation;
CDS_3359	dephosphorylation;
CDS_3363	metabolic process;
CDS_3376	protein phosphorylation;
CDS_3378	translation;
CDS_3385	posttranslational protein targeting to membrane, translocation;
CDS_3387	cellular glucan metabolic process;
CDS_3388	drug transmembrane transport;
CDS_3390	regulation of transcription from RNA polymerase II promoter; regulation of DNA-dependent transcription, elongation;
CDS_3397	cell redox homeostasis; oxidation-reduction process;
CDS_3399	GTP catabolic process;
CDS_3405	protein folding;
CDS_3406	protein folding;
CDS_3408	phosphorylation; glycolysis;
CDS_3412	metabolic process;
CDS_3416	regulation of transcription, DNA-dependent;
CDS_3420	transport;
CDS_3426	nucleobase-containing compound metabolic process;
CDS_3429	abscisic acid biosynthetic process; oxidation-reduction process;
CDS_3432	metabolic process;
CDS_3434	protein kinase C-activating G-protein coupled receptor signaling pathway;
CDS_3439	metal ion transport;
CDS_3449	trehalose biosynthetic process;
CDS_3455	metabolic process;
CDS_3456	small GTPase mediated signal transduction; protein transport;
CDS_3457	protein folding; response to stress;
CDS_3462	negative regulation of peptidase activity;
CDS_3463	response to oxidative stress;
CDS_3465	nucleoside metabolic process;
CDS_3473	translation;
CDS_3477	snRNA pseudouridine synthesis; ribosome biogenesis;
CDS_3480	oxidation-reduction process;
CDS_3483	lipid metabolic process;
CDS_3488	response to stress;
CDS_3490	protein farnesylation; regulation of cell proliferation;
CDS_3491	metabolic process;
CDS_3492	transcription, DNA-dependent;
CDS_3501	oxidation-reduction process;
CDS_3502	systemic acquired resistance; regulation of defense response; N-terminal protein myristoylation; proteolysis;
CDS_3504	cellular amino acid biosynthetic process; pyrimidine nucleotide biosynthetic process;
CDS_3505	ribosome biogenesis;
CDS_3506	signal transduction;
CDS_3515	ATP catabolic process;
CDS_3517	translation;
CDS_3523	pentose-phosphate shunt;
CDS_3533	protein folding;
CDS_3536	protein targeting to peroxisome;
CDS_3546	metabolic process;
CDS_3554	regulation of transcription, DNA-dependent;
CDS_3555	isoleucyl-tRNA aminoacylation; regulation of translational fidelity;
CDS_3558	metabolic process;
CDS_3562	transmembrane transport;
CDS_3563	nucleosome assembly;
CDS_3566	actin filament depolymerization;
CDS_3570	protein transport; cellular protein modification process;
CDS_3571	transport; ATP catabolic process;
CDS_3572	ubiquitin-dependent protein catabolic process;
CDS_3578	tricarboxylic acid cycle;
CDS_3583	cell redox homeostasis;
CDS_3588	protein retention in ER lumen;
CDS_3590	translation;
CDS_3592	regulation of transcription, DNA-dependent;
CDS_3595	transport;
CDS_3596	trehalose biosynthetic process;
CDS_3600	translation;
CDS_3601	cellular process;
CDS_3604	ribosome biogenesis;
CDS_3613	oxidation-reduction process;
CDS_3614	L-methionine salvage from methylthioadenosine;
CDS_3616	protein transport; Golgi organization;
CDS_3619	ATP catabolic process;
CDS_3620	protein folding; protein peptidyl-prolyl isomerization;
CDS_3621	regulation of protein catabolic process; regulation of catalytic activity;
CDS_3626	sulfate transport; transmembrane transport;
CDS_3628	cysteine metabolic process;
CDS_3629	intracellular protein transport;
CDS_3632	carbohydrate metabolic process;
CDS_3635	proteolysis;
CDS_3636	phosphorylation;
CDS_3638	translational initiation; mRNA cis splicing, via spliceosome; mRNA transport;
CDS_3639	nitrogen fixation; glutamine biosynthetic process;
CDS_3641	microtubule-based movement; oxidation-reduction process;
CDS_3642	regulation of protein catabolic process; regulation of catalytic activity;
CDS_3643	regulation of protein catabolic process; regulation of catalytic activity;
CDS_3645	intracellular protein transport;
CDS_3646	protein phosphorylation;
CDS_3648	polysaccharide catabolic process;
CDS_3655	regulation of transcription, DNA-dependent;
CDS_3656	vesicle-mediated transport; intracellular protein transport;
CDS_3658	NADP biosynthetic process; NAD metabolic process;
CDS_3659	ubiquitin-dependent protein catabolic process;
CDS_3662	small GTPase mediated signal transduction; nucleocytoplasmic transport; GTP catabolic process; intracellular protein transport;
CDS_3667	translation;
CDS_3670	glycolysis;
CDS_3674	phosphorylation; inositol trisphosphate metabolic process;
CDS_3676	protein catabolic process; proteolysis;
CDS_3678	ATP hydrolysis coupled proton transport;
CDS_3679	proteasomal ubiquitin-dependent protein catabolic process; nucleotide-excision repair;
CDS_3680	proteasomal ubiquitin-dependent protein catabolic process; nucleotide-excision repair;
CDS_3683	MAPK cascade; protein phosphorylation;
CDS_3684	metabolic process;
CDS_3685	regulation of transcription, DNA-dependent;
CDS_3691	protein N-linked glycosylation via asparagine;
CDS_3692	cell redox homeostasis; glycerol ether metabolic process;
CDS_3693	translation;
CDS_3696	regulation of cell division; cell differentiation;
CDS_3701	lipid metabolic process;
CDS_3708	protein catabolic process;
CDS_3711	protein folding; response to heat;
CDS_3712	biotin transport;
CDS_3715	translation;
CDS_3723	intracellular protein transport;
CDS_3726	metabolic process;
CDS_3727	photosynthesis, light harvesting;
CDS_3732	protein phosphorylation;
CDS_3738	vesicle-mediated transport;
CDS_3739	calcium ion transmembrane transport;
CDS_3743	ATP metabolic process; ATP hydrolysis coupled proton transport;
CDS_3744	vesicle-mediated transport;
CDS_3745	regulation of transcription, DNA-dependent;
CDS_3746	regulation of transcription, DNA-dependent;
CDS_3748	proteolysis;
CDS_3756	oxidation-reduction process;
CDS_3767	lipid metabolic process;
CDS_3772	transcription from RNA polymerase III promoter;
CDS_3780	protein phosphorylation;
CDS_3783	proton-transporting ATP synthase complex assembly;
CDS_3784	cell cycle; cell division; GTP catabolic process;
CDS_3790	cellular amino acid metabolic process;
CDS_3794	sucrose transport;
CDS_3806	translation;
CDS_3807	phosphatidylinositol phosphorylation;
CDS_3812	lipid metabolic process;
CDS_3813	transmembrane transport;
CDS_3818	transport;
CDS_3820	cellular glucan metabolic process;
CDS_3821	protein N-linked glycosylation via asparagine;
CDS_3823	vesicle-mediated transport; intracellular protein transport;
CDS_3824	translation;
CDS_3825	translation;
CDS_3827	regulation of transcription, DNA-dependent;
CDS_3836	fatty acid biosynthetic process;
CDS_3837	amino acid transmembrane transport;
CDS_3838	base-excision repair;
CDS_3849	drug transmembrane transport;
CDS_3859	ribosomal large subunit biogenesis; translational initiation; mature ribosome assembly;
CDS_3865	protein methylation;
CDS_3874	protein dephosphorylation;
CDS_3876	vesicle-mediated transport; intracellular protein transport;
CDS_3878	chitin catabolic process; polysaccharide catabolic process;
CDS_3889	Mo-molybdopterin cofactor biosynthetic process;
CDS_3891	phosphorylation;
CDS_3892	metabolic process;
CDS_3893	transcription, DNA-dependent;
CDS_3894	protein methylation;
CDS_3896	purine nucleotide biosynthetic process;
CDS_3897	folic acid-containing compound biosynthetic process; oxidation-reduction process;
CDS_3902	DNA repair;
CDS_3904	methylation;
CDS_3906	translation;
CDS_3907	transcription, DNA-dependent;
CDS_3909	threonine biosynthetic process;
CDS_3910	threonine biosynthetic process;
CDS_3911	metabolic process;
CDS_3912	translational initiation;
CDS_3913	protein catabolic process;
CDS_3914	protein phosphorylation;
CDS_3915	RNA processing; regulation of transcription, DNA-dependent; regulation of cyclin-dependent protein serine/threonine kinase activity;
CDS_3916	ATP catabolic process;
CDS_3917	oxidation-reduction process;
CDS_3918	calcium ion transmembrane transport;
CDS_3922	protein polymerization; GTP catabolic process; microtubule-based process;
CDS_3926	small GTPase mediated signal transduction; protein transport;
CDS_3930	potassium ion transmembrane transport;
CDS_3932	nucleosome assembly;
CDS_3934	regulation of transcription, DNA-dependent;
CDS_3935	translational initiation;
CDS_3936	ER to Golgi vesicle-mediated transport; protein transport;
CDS_3940	metabolic process;
CDS_3941	carbohydrate metabolic process;
CDS_3947	ubiquitin-dependent protein catabolic process;
CDS_3951	regulation of transcription, DNA-dependent;
CDS_3953	response to oxidative stress; oxidation-reduction process;
CDS_3954	regulation of transcription, DNA-dependent; regulation of cyclin-dependent protein serine/threonine kinase activity;
CDS_3956	regulation of transcription, DNA-dependent;
CDS_3965	oxidation-reduction process;
CDS_3966	microtubule-based movement;
CDS_3971	translation;
CDS_3974	intracellular protein transport; ER to Golgi vesicle-mediated transport;
CDS_3978	cell redox homeostasis; glycerol ether metabolic process;
CDS_3984	oxidation-reduction process;
CDS_3987	misfolded or incompletely synthesized protein catabolic process;
CDS_3988	biosynthetic process;
CDS_3989	actin cytoskeleton organization;
CDS_3990	mRNA splicing, via spliceosome;
CDS_3994	proteolysis;
CDS_3995	protein phosphorylation;
CDS_3996	protein folding;
CDS_3999	cellular amino acid biosynthetic process; pyrimidine nucleotide biosynthetic process;
CDS_4000	translation;
CDS_4010	proteolysis;
CDS_4020	macromolecule metabolic process; primary metabolic process;
CDS_4022	protein phosphorylation;
CDS_4023	protein phosphorylation;
CDS_4025	vesicle-mediated transport;
CDS_4030	'de novo' UMP biosynthetic process; 'de novo' pyrimidine nucleobase biosynthetic process;
CDS_4031	tryptophanyl-tRNA aminoacylation;
CDS_4038	translation;
CDS_4039	phosphorylation;
CDS_4063	multicellular organismal development;
CDS_4064	oxidation-reduction process;
CDS_4065	phosphorylation;
CDS_4066	regulation of transcription, DNA-dependent;
CDS_4067	valyl-tRNA aminoacylation; regulation of translational fidelity;
CDS_4070	small GTPase mediated signal transduction;
CDS_4074	oxidation-reduction process;
CDS_4077	carbohydrate metabolic process;
CDS_4078	mRNA processing;
CDS_4081	regulation of actin filament polymerization;
CDS_4086	amine metabolic process;
CDS_4087	protein transport;
CDS_4094	biosynthetic process;
CDS_4095	oxidation-reduction process;
CDS_4100	heme oxidation;
CDS_4101	protein transport;
CDS_4105	regulation of transcription, DNA-dependent;
CDS_4108	tRNA processing;
CDS_4115	transmembrane transport; ATP catabolic process;
CDS_4118	oxidation-reduction process;
CDS_4125	response to stress;
CDS_4142	carbohydrate metabolic process;
CDS_4146	tetrapyrrole biosynthetic process; peptidyl-pyrromethane cofactor linkage;
CDS_4147	protein polymerization; GTP catabolic process; microtubule-based process;
CDS_4151	protein targeting to peroxisome;
CDS_4155	RNA processing;
CDS_4161	electron transport chain;
CDS_4164	regulation of transcription, DNA-dependent; nucleosome assembly;
CDS_4166	positive regulation of Rac GTPase activity; cell chemotaxis;
CDS_4174	polysaccharide catabolic process;
CDS_4176	cysteine metabolic process;
CDS_4180	oxidation-reduction process; GMP biosynthetic process;
CDS_4192	metabolic process;
CDS_4201	cellular amino acid metabolic process; oxidation-reduction process;
CDS_4203	metabolic process;
CDS_4208	oxidation-reduction process;
CDS_4223	ATP hydrolysis coupled proton transport;
CDS_4227	mannose metabolic process;
CDS_4228	fatty acid biosynthetic process;
CDS_4229	transport;
CDS_4233	oxidation-reduction process;
CDS_4240	metabolic process;
CDS_4249	regulation of transcription, DNA-dependent;
CDS_4256	tricarboxylic acid cycle; glyoxylate cycle;
CDS_4261	protein phosphorylation;
CDS_4263	response to oxidative stress; oxidation-reduction process;
CDS_4267	translation;
CDS_4268	translation;
CDS_4272	cellular metabolic process;
CDS_4275	fatty acid biosynthetic process; oxidation-reduction process;
CDS_4277	GTP catabolic process; SRP-dependent cotranslational protein targeting to membrane;
CDS_4278	signal peptide processing;
CDS_4279	signal peptide processing;
CDS_4282	methylation;
CDS_4283	translational initiation;
CDS_4287	cell redox homeostasis;
CDS_4290	protein folding;
CDS_4291	carbohydrate metabolic process; glycerol-3-phosphate catabolic process; oxidation-reduction process;
CDS_4300	vesicle-mediated transport;
CDS_4304	ATP catabolic process;
CDS_4308	protein phosphorylation;
CDS_4309	oxidation-reduction process;
CDS_4313	lipid metabolic process; intracellular signal transduction;
CDS_4316	chlorophyll biosynthetic process; photosynthesis; oxidation-reduction process;
CDS_4320	response to cytokinin stimulus; metabolic process;
CDS_4324	transport;
CDS_4325	transcription, DNA-dependent; nucleotide-excision repair;
CDS_4329	protein phosphorylation;
CDS_4330	ubiquitin-dependent protein catabolic process;
CDS_4342	translational elongation;
CDS_4347	protein metabolic process; response to stress;
CDS_4353	oxidation-reduction process; histidine biosynthetic process;
CDS_4357	DNA-dependent transcription, initiation; regulation of sequence-specific DNA binding transcription factor activity;
CDS_4358	proteolysis;
CDS_4359	amine metabolic process;
CDS_4360	protein folding;
CDS_4363	methylation;
CDS_4366	small GTPase mediated signal transduction; protein transport;
CDS_4368	protein phosphorylation; signal transduction;
CDS_4372	translational initiation;
CDS_4373	transmembrane transport; potassium ion transport;
CDS_4374	proteolysis;
CDS_4378	oxidation-reduction process;
CDS_4379	malate metabolic process; oxidation-reduction process;
CDS_4383	translational elongation; GTP catabolic process;
CDS_4384	protein dephosphorylation;
CDS_4385	exocytosis;
CDS_4394	glycogen biosynthetic process;
CDS_4396	transcription, DNA-dependent;
CDS_4397	intracellular signal transduction; regulation of transcription, DNA-dependent; signal transduction by phosphorylation; ethylene mediated signaling pathway;
CDS_4399	cellular metabolic process;
CDS_4403	DNA recombination; DNA repair;
CDS_4404	protein folding; response to heat;
CDS_4419	protein folding;
CDS_4420	amino acid transmembrane transport;
CDS_4423	oxidation-reduction process;
CDS_4425	translation;
CDS_4427	nucleotide-excision repair; regulation of transcription, DNA-dependent;
CDS_4431	oxidation-reduction process;
CDS_4434	potassium ion transmembrane transport;
CDS_4437	regulation of transcription, DNA-dependent;
CDS_4438	DNA repair;
CDS_4439	translational elongation; GTP catabolic process; response to cadmium ion;
CDS_4452	potassium ion transport;
CDS_4456	tricarboxylic acid cycle; isocitrate metabolic process;
CDS_4457	protein phosphorylation;
CDS_4458	carbohydrate metabolic process;
CDS_4460	multicellular organismal development; protein ubiquitination; ubiquitin-dependent protein catabolic process;
CDS_4468	proteolysis involved in cellular protein catabolic process;
CDS_4469	DNA repair;
CDS_4473	carbohydrate metabolic process;
CDS_4478	histidine biosynthetic process;
CDS_4482	protein phosphorylation;
CDS_4483	transcription, DNA-dependent;
CDS_4490	translation;
CDS_4491	cell redox homeostasis;
CDS_4492	nucleic acid phosphodiester bond hydrolysis; RNA metabolic process;
CDS_4508	histidine biosynthetic process;
CDS_4509	metabolic process;
CDS_4511	cell cycle arrest;
CDS_4513	protein phosphorylation;
CDS_4519	translation;
CDS_4520	ribosome biogenesis;
CDS_4523	regulation of transcription, DNA-dependent;
CDS_4524	metabolic process;
CDS_4525	small GTPase mediated signal transduction;
CDS_4526	proteolysis;
CDS_4527	oxidation-reduction process;
CDS_4532	biosynthetic process;
CDS_4539	translation;
CDS_4543	transmembrane transport;
CDS_4544	aromatic amino acid family metabolic process;
CDS_4545	regulation of ARF GTPase activity;
CDS_4546	response to cadmium ion; defense response to oomycetes; glutathione transport;
CDS_4550	RNA methylation; rRNA processing;
CDS_4552	pentose-phosphate shunt;
CDS_4554	oxidation-reduction process;
CDS_4570	translation;
CDS_4572	small GTPase mediated signal transduction;
CDS_4574	translational elongation;
CDS_4580	regulation of transcription, DNA-dependent;
CDS_4584	phosphorylation;
CDS_4586	protein phosphorylation;
CDS_4593	cellular metabolic process;
CDS_4602	microtubule cytoskeleton organization;
CDS_4603	protein folding; response to cadmium ion; response to heat; response to virus; response to salt stress;
CDS_4604	protein targeting to mitochondrion;
CDS_4606	mRNA processing;
CDS_4609	vesicle-mediated transport; intracellular protein transport;
CDS_4613	cellulose biosynthetic process;
CDS_4614	cell morphogenesis; cytoskeleton organization;
CDS_4625	glycogen catabolic process;
CDS_4630	translation;
CDS_4631	protein processing;
CDS_4632	transcription, DNA-dependent;
CDS_4633	uracil salvage; nucleoside metabolic process;
CDS_4634	carotenoid biosynthetic process;
CDS_4636	protein phosphorylation; signal transduction;
CDS_4637	protein transport; autophagy; proteolysis;
CDS_4639	protein folding; response to stress;
CDS_4640	ubiquitin-dependent protein catabolic process;
CDS_4642	oxidation-reduction process;
CDS_4646	lysyl-tRNA aminoacylation;
CDS_4647	cell cycle; phosphorylation;
CDS_4655	protoporphyrinogen IX biosynthetic process; oxidation-reduction process;
CDS_4656	vesicle-mediated transport; intracellular protein transport;
CDS_4658	translation;
CDS_4662	small GTPase mediated signal transduction; protein transport;
CDS_4669	transcription initiation from RNA polymerase II promoter;
CDS_4674	protein phosphorylation;
CDS_4676	proteolysis;
CDS_4681	cell redox homeostasis; glycerol ether metabolic process;
CDS_4683	ubiquitin-dependent protein catabolic process;
CDS_4688	oxylipin biosynthetic process; oxidation-reduction process;
CDS_4689	response to cadmium ion; ubiquitin-dependent protein catabolic process;
CDS_4694	RNA-dependent DNA replication; proteolysis; DNA integration;
CDS_4695	glycogen biosynthetic process;
CDS_4706	protein phosphorylation;
CDS_4707	protein phosphorylation;
CDS_4708	protein phosphorylation;
CDS_4714	tryptophanyl-tRNA aminoacylation;
CDS_4718	oxidation-reduction process;
CDS_4719	transmembrane transport;
CDS_4727	ATP catabolic process;
CDS_4730	protein phosphorylation;
CDS_4733	oxidation-reduction process; regulation of transcription, DNA-dependent; glutamate biosynthetic process; proline catabolic process to glutamate; proline biosynthetic process;
CDS_4736	multicellular organismal development; protein ubiquitination; ubiquitin-dependent protein catabolic process;
CDS_4737	protein phosphorylation;
CDS_4738	protein phosphorylation;
CDS_4740	transport;
CDS_4742	folic acid-containing compound biosynthetic process; oxidation-reduction process;
CDS_4746	oxidation-reduction process;
CDS_4747	oxidation-reduction process;
CDS_4749	oxidation-reduction process;
CDS_4750	oxidation-reduction process;
CDS_4752	protein refolding;
CDS_4753	glycolipid transport;
CDS_4757	RNA modification;
CDS_4762	phosphorylation;
CDS_4769	chorismate metabolic process; aromatic amino acid family biosynthetic process;
CDS_4772	protein phosphorylation;
CDS_4774	extracellular polysaccharide biosynthetic process;
CDS_4777	metabolic process;
CDS_4781	regulation of transcription, DNA-dependent;
CDS_4782	regulation of transcription from RNA polymerase II promoter;
CDS_4784	metabolic process;
CDS_4785	ATP synthesis coupled proton transport; aerobic electron transport chain;
CDS_4788	protein import into nucleus;
CDS_4795	oxidation-reduction process;
CDS_4798	oxidation-reduction process;
CDS_4800	metabolic process;
CDS_4805	metabolic process;
CDS_4812	protein ubiquitination; ubiquitin-dependent protein catabolic process;
CDS_4813	ubiquitin-dependent protein catabolic process;
CDS_4815	methylation;
CDS_4824	protein glycosylation;
CDS_4825	protein phosphorylation;
CDS_4830	transcription initiation from RNA polymerase II promoter;
CDS_4834	urea catabolic process;
CDS_4843	protein phosphorylation;
CDS_4846	carbohydrate metabolic process;
CDS_4850	oxidation-reduction process;
CDS_4853	response to zinc ion; cellular amino acid metabolic process; proteolysis;
CDS_4861	ATP synthesis coupled proton transport; ATP hydrolysis coupled proton transport;
CDS_4864	protein phosphorylation; signal transduction;
CDS_4866	NAD biosynthetic process;
CDS_4867	proteolysis;
CDS_4868	protein transport;
CDS_4870	protein phosphorylation;
CDS_4882	L-arabinose metabolic process;
CDS_4885	tricarboxylic acid cycle; cellular carbohydrate metabolic process;
CDS_4889	fatty acid biosynthetic process; oxidation-reduction process;
CDS_4890	negative regulation of transcription from RNA polymerase III promoter;
CDS_4892	lipid metabolic process;
CDS_4902	protein neddylation;
CDS_4905	nucleobase-containing compound metabolic process;
CDS_4910	regulation of transcription, DNA-dependent;
CDS_4918	arginine metabolic process;
CDS_4919	methylation;
CDS_4925	methylation;
CDS_4926	regulation of ARF GTPase activity;
CDS_4927	phosphorylation; D-ribose metabolic process;
CDS_4929	translation;
CDS_4931	protein phosphorylation;
CDS_4945	mRNA splicing, via spliceosome;
CDS_4946	protein targeting;
CDS_4947	protein targeting;
CDS_4948	protein ubiquitination;
CDS_4950	protein phosphorylation;
CDS_4951	metabolic process;
CDS_4952	cobalt ion transport; nickel cation transmembrane transport;
CDS_4953	protein ubiquitination; trichome branching; DNA endoreduplication;
CDS_4954	protein phosphorylation;
CDS_4955	regulation of transcription, DNA-dependent;
CDS_4963	transmembrane transport; potassium ion transport;
CDS_4964	glutaminyl-tRNA aminoacylation;
CDS_4965	translation;
CDS_4966	transcription, DNA-dependent;
CDS_4972	translational initiation; translational frameshifting; peptidyl-lysine modification to hypusine; positive regulation of translational termination; positive regulation of translational elongation;
CDS_4982	signal peptide processing; proteolysis;
CDS_4986	ceramide metabolic process;
CDS_4987	aerobic respiration;
CDS_4988	response to stress;
CDS_4998	nucleobase-containing compound metabolic process;
CDS_4999	nucleobase-containing compound metabolic process;
CDS_5005	protein folding; protein peptidyl-prolyl isomerization;
CDS_5008	transmembrane transport;
CDS_5010	metabolic process;
CDS_5013	oxidation-reduction process;
CDS_5017	metabolic process;
CDS_5018	regulation of transcription, DNA-dependent;
CDS_5019	riboflavin biosynthetic process;
CDS_5020	threonine metabolic process; phosphorylation;
CDS_5026	nucleic acid phosphodiester bond hydrolysis; chiasma assembly; double-strand break repair via homologous recombination; mitotic recombination;
CDS_5030	transcription, DNA-dependent;
CDS_5039	transport;
CDS_5051	regulation of transcription, DNA-dependent;
CDS_5054	intracellular signal transduction; regulation of transcription, DNA-dependent; signal transduction by phosphorylation; ethylene mediated signaling pathway;
CDS_5059	translation;
CDS_5060	metabolic process;
CDS_5063	proteolysis involved in cellular protein catabolic process;
CDS_5064	proteolysis involved in cellular protein catabolic process;
CDS_5066	proton transport;
CDS_5082	protein folding;
CDS_5085	oxidation-reduction process;
CDS_5088	vesicle-mediated transport; intracellular protein transport;
CDS_5089	cellular glucan metabolic process;
CDS_5091	transmembrane transport; potassium ion transport;
CDS_5096	metabolic process;
CDS_5101	phosphatidylinositol phosphorylation; sulfur compound metabolic process;
CDS_5104	oxidation-reduction process;
CDS_5106	protein glycosylation;
CDS_5110	oxidation-reduction process;
CDS_5114	cellular aldehyde metabolic process; oxidation-reduction process;
CDS_5115	lipid metabolic process;
CDS_5118	intracellular protein transport;
CDS_5119	ATP biosynthetic process; cation transport; ATP catabolic process;
CDS_5123	biosynthetic process;
CDS_5125	phosphorelay signal transduction system; red, far-red light phototransduction; protein-tetrapyrrole linkage; regulation of transcription, DNA-dependent; protein-chromophore linkage; detection of visible light; signal transduction by phosphorylation;
CDS_5129	response to stress;
CDS_5132	tRNA 5'-leader removal; ion transport;
CDS_5135	protein transport;
CDS_5136	protein folding;
CDS_5144	transmembrane transport; ATP catabolic process;
CDS_5153	metabolic process;
CDS_5155	protoporphyrinogen IX biosynthetic process; oxidation-reduction process;
CDS_5157	nucleotide phosphorylation;
CDS_5162	transport;
CDS_5165	lipid metabolic process;
CDS_5167	SRP-dependent cotranslational protein targeting to membrane;
CDS_5168	DNA repair;
CDS_5169	transcription, DNA-dependent;
CDS_5171	intracellular signal transduction; phosphorelay signal transduction system; regulation of transcription, DNA-dependent;
CDS_5172	intracellular signal transduction; phosphorelay signal transduction system; regulation of transcription, DNA-dependent;
CDS_5173	carbohydrate metabolic process;
CDS_5175	proteolysis; regulation of catalytic activity;
CDS_5180	mitosis; protein phosphorylation; cell division;
CDS_5182	transcription, DNA-dependent; nucleotide-excision repair;
CDS_5197	ubiquitin-dependent protein catabolic process;
CDS_5198	ubiquitin-dependent protein catabolic process;
CDS_5200	cell wall macromolecule catabolic process;
CDS_5202	transmembrane transport; ATP catabolic process;
CDS_5204	proteolysis;
CDS_5210	translation;
CDS_5211	oxidation-reduction process;
CDS_5220	translation;
CDS_5227	biosynthetic process;
CDS_5228	regulation of transcription, DNA-dependent;
CDS_5235	malate metabolic process; tricarboxylic acid cycle; cellular carbohydrate metabolic process;
CDS_5239	translation;
CDS_5244	intracellular protein transport;
CDS_5248	ubiquitin-dependent protein catabolic process;
CDS_5251	response to stress; protein phosphorylation;
CDS_5252	macromolecule biosynthetic process;
CDS_5253	intracellular signal transduction; phosphorelay signal transduction system; regulation of transcription, DNA-dependent;
CDS_5256	RNA-dependent DNA replication;
CDS_5258	intracellular protein transport;
CDS_5260	negative regulation of translational elongation; SRP-dependent cotranslational protein targeting to membrane;
CDS_5262	flavonoid biosynthetic process;
CDS_5264	regulation of transcription, DNA-dependent;
CDS_5271	carbohydrate metabolic process;
CDS_5273	response to stress;
CDS_5276	oxidation-reduction process;
CDS_5277	DNA replication;
CDS_5278	protein transport;
CDS_5279	protein phosphorylation;
CDS_5280	intracellular protein transport;
CDS_5284	transmembrane transport;
CDS_5288	fatty acid biosynthetic process; oxidation-reduction process;
CDS_5290	DNA repair;
CDS_5296	fatty acid metabolic process; oxidation-reduction process;
CDS_5308	vesicle-mediated transport; intracellular protein transport;
CDS_5309	methylation;
CDS_5311	metal ion transport;
CDS_5312	protein phosphorylation;
CDS_5313	gluconeogenesis; glycolysis;
CDS_5316	protein folding;
CDS_5317	protein folding;
CDS_5318	oxidation-reduction process;
CDS_5322	organic substance catabolic process; protein metabolic process;
CDS_5324	protein transport;
CDS_5328	regulation of transcription, DNA-dependent;
CDS_5329	carbohydrate metabolic process;
CDS_5330	microtubule-based process;
CDS_5331	fatty acid biosynthetic process;
CDS_5333	mannose metabolic process;
CDS_5334	nucleic acid phosphodiester bond hydrolysis; tRNA splicing, via endonucleolytic cleavage and ligation;
CDS_5347	ribonucleoside monophosphate biosynthetic process; nucleotide biosynthetic process; nucleoside metabolic process; 5-phosphoribose 1-diphosphate biosynthetic process; phosphorylation;
CDS_5348	transmembrane transport;
CDS_5349	transcription, DNA-dependent;
CDS_5351	small GTPase mediated signal transduction; protein transport;
CDS_5352	regulation of transcription, DNA-dependent; auxin mediated signaling pathway;
CDS_5356	oxidation-reduction process;
CDS_5359	carbohydrate metabolic process;
CDS_5361	methylation;
CDS_5371	fatty acid metabolic process; oxidation-reduction process;
CDS_5372	electron transport chain; tricarboxylic acid cycle;
CDS_5377	regulation of ARF GTPase activity;
CDS_5379	lipid metabolic process;
CDS_5382	protein phosphorylation;
CDS_5386	unsaturated fatty acid biosynthetic process; oxidation-reduction process;
CDS_5392	protein dephosphorylation;
CDS_5393	regulation of transcription, DNA-dependent;
CDS_5400	transmembrane transport;
CDS_5408	tricarboxylic acid cycle;
CDS_5410	drug transmembrane transport;
CDS_5412	GTP catabolic process;
CDS_5416	proteolysis; lipid metabolic process;
CDS_5417	proteolysis; lipid metabolic process;
CDS_5419	translation;
CDS_5420	metabolic process;
CDS_5422	transmembrane transport;
CDS_5425	transport;
CDS_5426	MAPK cascade; protein phosphorylation;
CDS_5427	valyl-tRNA aminoacylation; regulation of translational fidelity;
CDS_5431	protein retention in ER lumen;
CDS_5437	translation;
CDS_5439	vesicle-mediated transport; intracellular protein transport;
CDS_5441	vesicle-mediated transport;
CDS_5443	glycolysis;
CDS_5446	protein phosphorylation;
CDS_5447	glycyl-tRNA aminoacylation;
CDS_5448	ubiquitin-dependent protein catabolic process;
CDS_5458	biosynthetic process;
CDS_5465	phosphorylation;
CDS_5471	MAPK cascade; protein phosphorylation;
CDS_5472	DNA methylation on adenine;
CDS_5473	protein phosphorylation;
CDS_5474	regulation of transcription, DNA-dependent;
CDS_5477	regulation of transcription, DNA-dependent;
CDS_5478	metabolic process;
CDS_5481	metabolic process;
CDS_5482	metabolic process;
CDS_5490	phosphorylation;
CDS_5491	metabolic process;
CDS_5495	lipid metabolic process;
CDS_5504	translational elongation;
CDS_5511	protein transport;
CDS_5516	Arp2/3 complex-mediated actin nucleation;
CDS_5522	RNA processing;
CDS_5524	GTP catabolic process;
CDS_5527	protein phosphorylation;
CDS_5546	protein phosphorylation;
CDS_5548	protein phosphorylation; signal transduction;
CDS_5551	lipid metabolic process;
CDS_5559	transmembrane transport;
CDS_5563	cell redox homeostasis; glutathione metabolic process; oxidation-reduction process;
CDS_5565	fatty acid biosynthetic process; malonyl-CoA biosynthetic process;
CDS_5567	ATP synthesis coupled electron transport;
CDS_5568	transport;
CDS_5570	nucleotide-excision repair;
CDS_5578	methylation;
CDS_5581	fatty acid biosynthetic process; oxidation-reduction process;
CDS_5583	intracellular signal transduction;
CDS_5586	regulation of transcription, DNA-dependent;
CDS_5590	translation;
CDS_5594	fatty acid beta-oxidation using acyl-CoA dehydrogenase;
CDS_5601	queuosine biosynthetic process;
CDS_5603	proteolysis involved in cellular protein catabolic process;
CDS_5605	transport;
CDS_5608	regulation of transcription, DNA-dependent;
CDS_5610	regulation of transcription, DNA-dependent;
CDS_5612	branched-chain amino acid biosynthetic process;
CDS_5614	fatty acid biosynthetic process; malonyl-CoA biosynthetic process;
CDS_5618	glucan biosynthetic process;
CDS_5620	protein phosphorylation;
CDS_5621	protein phosphorylation;
CDS_5626	peptidyl-tyrosine dephosphorylation;
CDS_5629	cell redox homeostasis; glycerol ether metabolic process;
CDS_5631	small GTPase mediated signal transduction; protein transport;
CDS_5633	protein dephosphorylation;
CDS_5635	metabolic process;
CDS_5637	oxidation-reduction process; terpenoid biosynthetic process;
CDS_5638	DNA replication; DNA repair;
CDS_5649	regulation of transcription, DNA-dependent;
CDS_5650	oxidation-reduction process;
CDS_5651	protein phosphorylation;
CDS_5655	translation;
CDS_5657	translation;
CDS_5658	protein folding; response to heat;
CDS_5666	drug transmembrane transport;
CDS_5670	positive regulation of Rab GTPase activity;
CDS_5672	metal ion transport;
CDS_5675	translation;
CDS_5678	protein glycosylation;
CDS_5679	riboflavin biosynthetic process;
CDS_5682	metabolic process;
CDS_5684	cell morphogenesis;
CDS_5685	cell morphogenesis;
CDS_5692	potassium ion transport;
CDS_5695	mitochondrial transport;
CDS_5696	protein ubiquitination;
CDS_5699	transcription, DNA-dependent;
CDS_5700	protein ubiquitination;
CDS_5701	protein phosphorylation;
CDS_5713	intracellular protein transport;
CDS_5714	cellular glucan metabolic process;
CDS_5716	rRNA processing;
CDS_5717	protein phosphorylation;
CDS_5728	nucleoside diphosphate phosphorylation; UTP biosynthetic process; GTP biosynthetic process; CTP biosynthetic process;
CDS_5730	protein import into mitochondrial outer membrane;
CDS_5732	oxidation-reduction process;
CDS_5738	signal peptide processing;
CDS_5743	phosphorylation;
CDS_5747	S-adenosylmethionine biosynthetic process;
CDS_5751	photosynthesis;
CDS_5758	cell morphogenesis;
CDS_5768	transport;
CDS_5770	root hair cell tip growth; phosphatidylinositol-mediated signaling; phosphatidylinositol biosynthetic process; pollen tube growth; phosphatidylinositol phosphorylation;
CDS_5773	nucleosome assembly;
CDS_5774	isoleucine biosynthetic process; valine biosynthetic process; oxidation-reduction process;
CDS_5777	phosphorelay signal transduction system;
CDS_5779	pyridoxal phosphate biosynthetic process; oxidation-reduction process; pyridoxine biosynthetic process;
CDS_5782	proteolysis;
CDS_5783	protein folding; response to stress;
CDS_5785	DNA integration; DNA recombination;
CDS_5786	carbohydrate metabolic process;
CDS_5796	protein phosphorylation;
CDS_5801	tricarboxylic acid cycle;
CDS_5806	phosphorylation;
CDS_5811	oxidation-reduction process;
CDS_5812	small GTPase mediated signal transduction; protein transport;
CDS_5814	protein phosphorylation;
CDS_5816	protein folding;
CDS_5818	lipopolysaccharide biosynthetic process;
CDS_5820	vesicle-mediated transport; intracellular protein transport;
CDS_5821	protein phosphorylation;
CDS_5822	aromatic amino acid family biosynthetic process;
CDS_5823	regulation of transcription, DNA-dependent;
CDS_5824	regulation of transcription, DNA-dependent;
CDS_5826	cellular heat acclimation; seed development;
CDS_5830	oxidation-reduction process;
CDS_5831	DNA replication; oxidation-reduction process;
CDS_5844	small GTPase mediated signal transduction; protein transport;
CDS_5850	phosphorylation; glycolysis;
CDS_5851	vesicle-mediated transport; intracellular protein transport;
CDS_5857	metabolic process;
CDS_5859	transport;
CDS_5860	translation;
CDS_5861	regulation of transcription, DNA-dependent;
CDS_5865	RNA processing;
CDS_5871	cellular metabolic process;
CDS_5875	protein phosphorylation;
CDS_5877	copper ion transport;
CDS_5878	tricarboxylic acid cycle; carbon fixation;
CDS_5881	vesicle fusion with Golgi apparatus; intracellular protein transport;
CDS_5882	regulation of primary metabolic process; regulation of cellular metabolic process; regulation of macromolecule metabolic process; transcription, DNA-dependent;
CDS_5883	transmembrane transport;
CDS_5889	nucleosome assembly;
CDS_5890	regulation of transcription, DNA-dependent;
CDS_5893	ATP synthesis coupled proton transport;
CDS_5896	lysine biosynthetic process via diaminopimelate;
CDS_5898	pyrimidine nucleotide biosynthetic process;
CDS_5905	oxidation-reduction process;
CDS_5908	protein phosphorylation; regulation of signal transduction;
CDS_5913	regulation of transcription, DNA-dependent;
CDS_5915	protein phosphorylation;
CDS_5921	protein ubiquitination;
CDS_5926	translation;
CDS_5928	protein ubiquitination;
CDS_5930	protein targeting;
CDS_5935	regulation of transcription, DNA-dependent;
CDS_5936	chorismate biosynthetic process; aromatic amino acid family biosynthetic process;
CDS_5938	protein transport;
CDS_5939	oxidation-reduction process;
CDS_5942	translation;
CDS_5946	sterol metabolic process;
CDS_5949	nucleosome assembly;
CDS_5957	regulation of ARF protein signal transduction;
CDS_5961	gamma-aminobutyric acid catabolic process; oxidation-reduction process;
CDS_5962	fucosylation; protein glycosylation;
CDS_5963	isoprenoid biosynthetic process; coenzyme A metabolic process; oxidation-reduction process;
CDS_5977	vesicle docking involved in exocytosis;
CDS_5979	metabolic process;
CDS_5983	signal transduction; regulation of transcription, DNA-dependent;
CDS_5984	drug transmembrane transport;
CDS_5989	protein phosphorylation;
CDS_5993	protein phosphorylation;
CDS_5994	tricarboxylic acid cycle;
CDS_5995	tricarboxylic acid cycle;
CDS_6000	cell cycle; cell division; chromosome segregation;
CDS_6010	regulation of actin filament polymerization;
CDS_6012	cell redox homeostasis; glycerol ether metabolic process;
CDS_6016	protein polymerization; GTP catabolic process;
CDS_6034	RNA processing;
CDS_6035	RNA splicing;
CDS_6036	RNA splicing;
CDS_6040	small GTPase mediated signal transduction;
CDS_6043	regulation of transcription, DNA-dependent;
CDS_6052	aspartyl-tRNA aminoacylation;
CDS_6053	superoxide metabolic process; oxidation-reduction process;
CDS_6055	protein phosphorylation;
CDS_6061	metabolic process;
CDS_6065	RNA processing;
CDS_6067	regulation of transcription from RNA polymerase II promoter;
CDS_6069	oligopeptide transport;
CDS_6070	oligopeptide transport;
CDS_6071	microtubule-based process;
CDS_6072	magnesium ion transport;
CDS_6078	ER to Golgi vesicle-mediated transport;
CDS_6080	protein phosphorylation;
CDS_6081	leucine biosynthetic process;
CDS_6082	regulation of transcription, DNA-dependent;
CDS_6083	translation;
CDS_6085	translation;
CDS_6088	ATP catabolic process;
CDS_6093	regulation of translational fidelity; leucyl-tRNA aminoacylation;
CDS_6100	cofactor biosynthetic process; cobalamin biosynthetic process; nucleoside biosynthetic process;
CDS_6103	plant-type cell wall organization;
CDS_6106	regulation of transcription, DNA-dependent;
CDS_6107	transmembrane transport;
CDS_6116	protein phosphorylation;
CDS_6132	metabolic process;
CDS_6136	microtubule-based process;
CDS_6140	ATP synthesis coupled proton transport;
CDS_6143	oxidation-reduction process;
CDS_6148	protein polymerization; GTP catabolic process;
CDS_6151	metabolic process;
CDS_6152	oxidation-reduction process;
CDS_6156	proteolysis;
CDS_6157	proteolysis;
CDS_6160	'de novo' IMP biosynthetic process;
CDS_6162	transmembrane transport;
CDS_6163	RNA-dependent DNA replication; proteolysis; DNA integration;
CDS_6164	mRNA splicing, via spliceosome;
CDS_6170	protein dephosphorylation;
CDS_6175	transcription, DNA-dependent;
CDS_6179	oxidation-reduction process;
CDS_6181	threonylcarbamoyladenosine biosynthetic process; proteolysis;
CDS_6185	regulation of transcription, DNA-dependent;
CDS_6186	keto-3-deoxy-D-manno-octulosonic acid biosynthetic process;
CDS_6190	cell redox homeostasis; oxidation-reduction process;
CDS_6194	drug transmembrane transport;
CDS_6196	oxidation-reduction process; aromatic amino acid family metabolic process;
CDS_6197	DNA-dependent transcription, initiation;
CDS_6200	DNA repair;
CDS_6201	cellular metabolic process;
CDS_6208	carbohydrate phosphorylation; galactose metabolic process;
CDS_6209	carbohydrate phosphorylation; galactose metabolic process;
CDS_6210	regulation of transcription, DNA-dependent;
CDS_6211	amine metabolic process;
CDS_6216	oxidation-reduction process;
CDS_6217	protein phosphorylation;
CDS_6220	formaldehyde catabolic process;
CDS_6226	tryptophan biosynthetic process;
CDS_6227	DNA repair;
CDS_6228	autophagic vacuole assembly;
CDS_6230	small GTPase mediated signal transduction; protein transport;
CDS_6237	regulation of transcription, DNA-dependent;
CDS_6244	metabolic process;
CDS_6249	transposition, DNA-mediated;
CDS_6253	response to stress; regulation of transcription, DNA-dependent;
CDS_6254	proteolysis;
CDS_6255	regulation of transcription, DNA-dependent;
CDS_6258	oxidation-reduction process;
CDS_6264	nucleotide-sugar transport; carbohydrate transport;
CDS_6266	protein folding; protein peptidyl-prolyl isomerization;
CDS_6269	translational initiation;
CDS_6270	oxidation-reduction process;
CDS_6275	vesicle-mediated transport; intracellular protein transport;
CDS_6276	translation;
CDS_6277	proteolysis;
CDS_6280	protein ubiquitination;
CDS_6288	proteolysis;
CDS_6290	hexose metabolic process;
CDS_6291	carbohydrate metabolic process;
CDS_6297	phosphorylation;
CDS_6300	cell redox homeostasis; glycerol ether metabolic process;
CDS_6302	protein folding; response to stress;
CDS_6304	purine nucleotide metabolic process;
CDS_6312	transmembrane transport; magnesium ion transport;
CDS_6319	carbohydrate metabolic process;
CDS_6320	regulation of transcription, DNA-dependent;
CDS_6322	metabolic process;
CDS_6331	cation transport; phospholipid transport;
CDS_6332	cysteine biosynthetic process from serine;
CDS_6335	oxidation-reduction process;
CDS_6337	protein folding; oxidation-reduction process;
CDS_6338	protein folding; oxidation-reduction process;
CDS_6339	regulation of transcription, DNA-dependent;
CDS_6340	transmembrane transport; ATP catabolic process;
CDS_6342	proteolysis;
CDS_6347	magnesium ion transport;
CDS_6348	iron-sulfur cluster assembly;
CDS_6353	pseudouridine synthesis;
CDS_6356	translational initiation;
CDS_6361	proteolysis;
CDS_6363	calcium ion transport; transmembrane transport;
CDS_6365	proteolysis;
CDS_6369	protein ubiquitination; ubiquitin-dependent protein catabolic process;
CDS_6370	DNA integration;
CDS_6372	oxidation-reduction process;
CDS_6379	tubulin complex assembly;
CDS_6380	proteolysis; lipid metabolic process;
CDS_6381	protein dephosphorylation;
CDS_6388	nicotinamide nucleotide metabolic process;
CDS_6389	steroid metabolic process; oxidation-reduction process;
CDS_6390	transport;
[truncated: 9,040 more rows]

## Sheet: cellular componen
CDS IDs	GO cellular component
CDS_6	cytoplasm;
CDS_15	nucleus;
CDS_21	membrane;
CDS_25	integral to membrane;
CDS_27	eukaryotic translation elongation factor 1 complex;
CDS_31	small ribosomal subunit;
CDS_33	cytoplasm;
CDS_40	plastid;
CDS_41	ribosome;
CDS_42	intracellular;
CDS_53	integral to membrane;
CDS_57	extracellular region;
CDS_60	cytoplasm;
CDS_61	vacuole; chloroplast; nucleolus; plasma membrane; mitochondrion;
CDS_63	COPII vesicle coat;
CDS_65	integral to membrane;
CDS_74	cytoplasm; proteasome core complex; nucleus;
CDS_75	cytoplasm; proteasome core complex; nucleus;
CDS_76	cytoplasm; proteasome core complex; nucleus;
CDS_82	cytoplasm; proteasome core complex; nucleus;
CDS_84	endoplasmic reticulum;
CDS_93	membrane;
CDS_114	cytoplasm;
CDS_127	integral to membrane;
CDS_129	pyruvate dehydrogenase complex;
CDS_130	pyruvate dehydrogenase complex;
CDS_133	eukaryotic translation elongation factor 1 complex;
CDS_137	integral to membrane;
CDS_144	cytoplasm;
CDS_148	nucleus;
CDS_149	cytoplasm;
CDS_151	integral to membrane;
CDS_152	integral to membrane;
CDS_172	ribosome; chloroplast;
CDS_174	protein complex; chloroplast; vacuole;
CDS_185	phosphopyruvate hydratase complex;
CDS_190	endoplasmic reticulum;
CDS_195	peroxisome;
CDS_202	mRNA cleavage factor complex;
CDS_219	T=1 icosahedral viral capsid; host cell cytoplasm;
CDS_223	membrane;
CDS_229	cytoplasm;
CDS_230	integral to membrane;
CDS_250	cytoplasm;
CDS_251	mitochondrion;
CDS_252	small ribosomal subunit;
CDS_265	membrane; lipid particle;
CDS_281	cytoplasm; nucleolus;
CDS_287	glyoxysome;
CDS_296	nucleus;
CDS_301	mitochondrial inner membrane presequence translocase complex; integral to membrane;
CDS_310	plasma membrane; integral to membrane;
CDS_314	membrane;
CDS_333	integral to membrane;
CDS_334	integral to membrane;
CDS_335	integral to membrane;
CDS_336	integral to membrane;
CDS_346	membrane;
CDS_355	integral to membrane;
CDS_360	mitochondrion;
CDS_367	plasma membrane;
CDS_368	nucleus;
CDS_372	ribosome;
CDS_375	nucleus;
CDS_386	membrane;
CDS_399	mitochondrial inner membrane; integral to membrane;
CDS_402	peroxisomal membrane;
CDS_406	intracellular;
CDS_407	endoplasmic reticulum membrane;
CDS_410	large ribosomal subunit;
CDS_414	ribosome;
CDS_421	ribosome;
CDS_423	chloroplast outer membrane;
CDS_426	mitochondrion;
CDS_434	nuclear pore;
CDS_441	intrinsic to endoplasmic reticulum membrane;
CDS_445	nucleus;
CDS_446	membrane;
CDS_457	cytoskeleton;
CDS_471	prefoldin complex;
CDS_473	integral to membrane;
CDS_490	integral to membrane;
CDS_493	Golgi transport complex;
CDS_498	integral to membrane; endoplasmic reticulum;
CDS_499	apoplast; cell wall;
CDS_508	outer membrane-bounded periplasmic space;
CDS_509	intracellular;
CDS_512	intracellular membrane-bounded organelle;
CDS_525	extracellular region;
CDS_530	integral to membrane;
CDS_540	clathrin adaptor complex; clathrin coat of coated pit;
CDS_541	clathrin adaptor complex; clathrin coat of coated pit;
CDS_551	chloroplast;
CDS_565	cytoplasm;
CDS_572	integral to membrane;
CDS_577	intracellular;
CDS_581	ribosome;
CDS_587	small ribosomal subunit;
CDS_588	nucleus;
CDS_590	nucleus;
CDS_591	nucleus;
CDS_596	nucleus;
CDS_612	integral to membrane;
CDS_613	integral to peroxisomal membrane;
CDS_619	chloroplast envelope; integral to membrane;
CDS_620	integral to membrane; Golgi membrane; extracellular region; endosome membrane; plasma membrane;
CDS_621	nucleosome; nucleus;
CDS_625	integral to membrane;
CDS_626	integral to membrane; endoplasmic reticulum; mitochondrion;
CDS_628	integral to membrane;
CDS_631	RNA-induced silencing complex;
CDS_635	endoplasmic reticulum;
CDS_639	integral to membrane;
CDS_642	ribosome;
CDS_652	integral to membrane;
CDS_664	ribosome;
CDS_669	endoplasmic reticulum;
CDS_670	nucleus;
CDS_671	cytoplasm;
CDS_672	nuclear pore;
CDS_675	integral to membrane;
CDS_678	cytoplasm;
CDS_679	cytoplasm;
CDS_685	membrane coat;
CDS_688	mitochondrial respiratory chain complex III;
CDS_697	nucleosome; nucleus;
CDS_698	nucleosome; nucleus;
CDS_700	integral to membrane;
CDS_721	proton-transporting V-type ATPase, V0 domain; vacuolar membrane; integral to membrane;
CDS_722	integral to membrane;
CDS_732	ribosome;
CDS_733	ribosome;
CDS_738	clathrin adaptor complex;
CDS_742	cytoplasm;
CDS_755	spliceosomal complex;
CDS_760	ribosome;
CDS_764	integral to membrane;
CDS_771	integral to membrane;
CDS_773	nucleus;
CDS_776	chloroplast; membrane;
CDS_778	nucleus;
CDS_779	chloroplast;
CDS_781	cytoplasm;
CDS_784	membrane;
CDS_795	cytoplasm;
CDS_796	integral to membrane; signal peptidase complex;
CDS_798	integral to membrane; plasma membrane;
CDS_801	vacuolar membrane; integral to membrane;
CDS_803	integral to membrane;
CDS_804	intracellular;
CDS_806	nucleus;
CDS_814	small ribosomal subunit;
CDS_823	integral to membrane;
CDS_834	integral to membrane;
CDS_837	vacuole; proton-transporting V-type ATPase, V0 domain; integral to membrane;
CDS_846	integral to membrane;
CDS_849	nucleus;
CDS_853	cytoplasm; nucleus;
CDS_857	cytoplasm;
CDS_858	nucleus;
CDS_862	integral to membrane;
CDS_865	ribosome;
CDS_868	integral to membrane;
CDS_872	large ribosomal subunit;
CDS_880	intracellular;
CDS_886	membrane;
CDS_903	ribosome;
CDS_922	ribosome;
CDS_926	ribosome;
CDS_927	ribosome;
CDS_929	core TFIIH complex;
CDS_941	plasma membrane; integral to membrane;
CDS_943	ribosome;
CDS_944	ribosome;
CDS_949	integral to membrane;
CDS_955	ribosome;
CDS_964	ribosome;
CDS_970	integral to peroxisomal membrane;
CDS_974	Golgi apparatus;
CDS_975	vacuole; Golgi-associated vesicle; plastid;
CDS_980	nucleus;
CDS_993	integral to membrane;
CDS_1009	nucleus;
CDS_1015	ribosome;
CDS_1016	clathrin adaptor complex;
CDS_1018	membrane;
CDS_1019	integral to membrane;
CDS_1028	membrane;
CDS_1029	mitochondrial inner membrane;
CDS_1030	integral to membrane;
CDS_1033	integral to membrane;
CDS_1035	integral to membrane;
CDS_1042	Ino80 complex;
CDS_1044	ribosome;
CDS_1045	ribosome;
CDS_1055	mitochondrial inner membrane; respiratory chain;
CDS_1069	integral to membrane;
CDS_1070	cytoplasm;
CDS_1083	eukaryotic translation initiation factor 3 complex; nucleus;
CDS_1084	cytoplasm; proteasome core complex; nucleus;
CDS_1088	chloroplast;
CDS_1095	microtubule; cytoplasm;
CDS_1098	nucleus;
CDS_1104	large ribosomal subunit;
CDS_1107	membrane;
CDS_1110	integral to membrane;
CDS_1117	nucleus;
CDS_1120	ribosome;
CDS_1124	integral to membrane;
CDS_1126	nucleolus; cytosolic large ribosomal subunit;
CDS_1127	chloroplast;
CDS_1133	ribosome;
CDS_1134	ribosome;
CDS_1138	chloroplast;
CDS_1154	ubiquitin ligase complex;
CDS_1155	glyoxysome;
CDS_1156	glyoxysome;
CDS_1165	cytoplasm;
CDS_1166	ribosome;
CDS_1168	nucleus;
CDS_1172	membrane;
CDS_1179	ribosome;
CDS_1181	cytoplasm; proteasome core complex, alpha-subunit complex; nucleus;
CDS_1201	integral to membrane;
CDS_1202	ribosome;
CDS_1205	ribosome;
CDS_1206	ribosome;
CDS_1213	ribosome;
CDS_1214	cytoplasm;
CDS_1234	integral to membrane;
CDS_1260	membrane;
CDS_1263	integral to membrane;
CDS_1265	integral to membrane;
CDS_1266	integral to membrane;
CDS_1267	integral to membrane;
CDS_1276	membrane;
CDS_1277	membrane;
CDS_1280	nucleus;
CDS_1285	ribosome;
CDS_1286	ribosome;
CDS_1289	ribosome;
CDS_1296	vacuolar proton-transporting V-type ATPase, V0 domain;
CDS_1297	endoplasmic reticulum membrane;
CDS_1302	integral to membrane;
CDS_1305	nucleus;
CDS_1306	cytoplasm;
CDS_1307	mitochondrial inner membrane;
CDS_1314	membrane;
CDS_1320	integral to membrane;
CDS_1323	integral to membrane;
CDS_1340	membrane;
CDS_1345	intracellular;
CDS_1351	WASH complex; F-actin capping protein complex;
CDS_1355	chloroplast;
CDS_1357	cytoplasm; proteasome core complex; nucleus;
CDS_1367	spliceosomal complex; plastid;
CDS_1389	mitochondrial outer membrane;
CDS_1402	Golgi apparatus; endoplasmic reticulum;
CDS_1407	ribosome;
CDS_1411	nucleus;
CDS_1412	integral to membrane;
CDS_1427	ribosome;
CDS_1429	chloroplast;
CDS_1432	integral to membrane;
CDS_1446	nucleus;
CDS_1450	proton-transporting V-type ATPase, V0 domain; vacuolar membrane; integral to membrane;
CDS_1456	integral to membrane;
CDS_1464	nucleus;
CDS_1465	nucleus;
CDS_1468	nucleosome; nucleus;
CDS_1490	nucleus;
CDS_1503	integral to membrane;
CDS_1515	integral to membrane;
CDS_1516	clathrin coat of coated pit; clathrin coat of trans-Golgi network vesicle;
CDS_1518	mitochondrial outer membrane;
CDS_1523	nucleolus;
CDS_1524	nuclear pore;
CDS_1527	integral to membrane;
CDS_1528	ribosome;
CDS_1531	integral to membrane;
CDS_1533	integral to membrane;
CDS_1535	ribosome;
CDS_1539	cytoplasm; proteasome core complex, alpha-subunit complex; nucleus;
CDS_1540	cytoplasm; proteasome core complex, alpha-subunit complex; nucleus;
CDS_1543	nucleolus;
CDS_1546	cytosolic large ribosomal subunit;
CDS_1547	membrane;
CDS_1552	integral to membrane;
CDS_1567	ribosome;
CDS_1573	nucleolus; vacuole; plasma membrane; cell wall; cytosolic small ribosomal subunit;
CDS_1581	cytoplasm;
CDS_1584	clathrin adaptor complex;
CDS_1586	vacuole; Golgi-associated vesicle; plastid;
CDS_1587	vacuole; Golgi-associated vesicle; plastid;
CDS_1594	ribosome;
CDS_1595	ribosome;
CDS_1597	mitochondrial outer membrane;
CDS_1611	cytoplasm; plasma membrane; nucleus;
CDS_1613	extrinsic to membrane; oxygen evolving complex;
CDS_1642	intracellular;
CDS_1643	chloroplast;
CDS_1647	integral to membrane;
CDS_1650	integral to membrane;
CDS_1654	membrane;
CDS_1664	nucleus;
CDS_1665	ribosome;
CDS_1667	endoplasmic reticulum;
CDS_1670	ribosome;
CDS_1671	integral to membrane;
CDS_1677	proton-transporting V-type ATPase, V0 domain; vacuolar membrane; integral to membrane;
CDS_1678	membrane;
CDS_1680	cytoplasm;
CDS_1681	integral to membrane;
CDS_1682	membrane;
CDS_1686	cytoplasm;
CDS_1694	nucleus;
CDS_1698	integral to membrane;
CDS_1700	membrane;
CDS_1702	cytoplasm;
CDS_1705	integral to membrane;
CDS_1706	membrane;
CDS_1707	chloroplast nucleoid;
CDS_1716	ribosome;
CDS_1718	nucleus;
CDS_1720	ribosome;
CDS_1722	endoplasmic reticulum;
CDS_1723	ribosome;
CDS_1725	integral to membrane;
CDS_1727	mitochondrial intermembrane space; respiratory chain;
CDS_1735	nucleoplasm; centriole; nucleolus; DNA topoisomerase complex (ATP-hydrolyzing); condensed chromosome; nuclear chromosome;
CDS_1739	cytoplasm; proteasome core complex, alpha-subunit complex; nucleus;
CDS_1740	membrane;
CDS_1747	ribosome;
CDS_1750	membrane;
CDS_1752	cytoplasm;
CDS_1784	mitochondrial inner membrane; respiratory chain; integral to membrane;
CDS_1786	integral to membrane;
CDS_1790	membrane;
CDS_1791	cytoplasm;
CDS_1792	ribosome;
CDS_1793	nucleus;
CDS_1809	endoplasmic reticulum;
CDS_1813	membrane;
CDS_1818	nucleus;
CDS_1819	integral to membrane;
CDS_1833	cytoplasm;
CDS_1838	integral to membrane;
CDS_1839	nucleus;
CDS_1842	ribosome;
CDS_1845	cytoplasm;
CDS_1847	photosystem II; chloroplast thylakoid membrane;
CDS_1849	membrane;
CDS_1853	integral to membrane; endoplasmic reticulum;
CDS_1874	cytoplasm;
CDS_1875	cytoplasm;
CDS_1891	mitochondrial respiratory chain;
CDS_1901	integral to membrane;
CDS_1904	cullin-RING ubiquitin ligase complex;
CDS_1915	membrane;
CDS_1919	eukaryotic translation elongation factor 1 complex;
CDS_1921	cytoplasm;
CDS_1925	integral to membrane; nucleus;
CDS_1933	nucleus;
CDS_1935	protein phosphatase type 2A complex;
CDS_1939	integral to membrane;
CDS_1952	small ribosomal subunit;
CDS_1953	small ribosomal subunit;
CDS_1955	chloroplast;
CDS_1963	ribosome;
CDS_1964	integral to membrane;
CDS_1969	cytoplasm;
CDS_1971	integral to membrane;
CDS_1978	6-phosphofructokinase complex;
CDS_1985	ribosome;
CDS_1986	ribosome;
CDS_1995	anaphase-promoting complex;
CDS_2010	ribosome;
CDS_2013	ribosome;
CDS_2014	clathrin coat;
CDS_2015	ribosome;
CDS_2018	chloroplast;
CDS_2021	mitochondrial proton-transporting ATP synthase complex, catalytic core F(1);
CDS_2029	ribosome;
CDS_2030	intracellular;
CDS_2032	integral to membrane;
CDS_2037	intracellular;
CDS_2043	nucleosome; nucleus;
CDS_2067	cytoplasm;
CDS_2071	monolayer-surrounded lipid storage body; integral to membrane;
CDS_2073	integral to membrane;
CDS_2078	integral to membrane;
CDS_2081	integral to membrane;
CDS_2089	integral to membrane;
CDS_2092	COPII vesicle coat;
CDS_2105	cytoplasm;
CDS_2106	cytoplasm;
CDS_2114	nucleosome; nucleus;
CDS_2115	nucleus;
CDS_2116	mitochondrial proton-transporting ATP synthase complex, catalytic core F(1);
CDS_2117	integral to membrane;
CDS_2119	cytoplasm;
CDS_2121	mediator complex;
CDS_2134	Golgi apparatus; integral to membrane;
CDS_2143	chloroplast;
CDS_2149	ribosome;
CDS_2154	nucleus;
CDS_2160	cytoplasm;
CDS_2161	chloroplast;
CDS_2162	chloroplast;
CDS_2166	intracellular;
CDS_2169	integral to membrane;
CDS_2171	nuclear pore;
CDS_2188	membrane;
CDS_2189	nucleus;
CDS_2192	cytoplasm;
CDS_2193	cytoplasm;
CDS_2197	endoplasmic reticulum;
CDS_2204	cytoplasm;
CDS_2211	plasma membrane;
CDS_2215	cytoplasm;
CDS_2222	integral to membrane;
CDS_2228	protein phosphatase type 2A complex;
CDS_2229	nucleus;
CDS_2231	integral to membrane;
CDS_2243	nucleus;
CDS_2244	integral to membrane;
CDS_2247	nucleus; cytosol;
CDS_2252	NuA4 histone acetyltransferase complex;
CDS_2253	NuA4 histone acetyltransferase complex;
CDS_2254	nuclear pore;
CDS_2255	nucleus;
CDS_2256	ubiquitin ligase complex;
CDS_2258	membrane;
CDS_2264	cytoplasm;
CDS_2274	mitochondrial proton-transporting ATP synthase complex, coupling factor F(o);
CDS_2275	mitochondrial inner membrane presequence translocase complex;
CDS_2281	cytoplasm;
CDS_2285	integral to membrane;
CDS_2301	cytosolic small ribosomal subunit; nucleus;
CDS_2307	integral to membrane;
CDS_2309	photosystem II;
CDS_2316	Arp2/3 protein complex;
CDS_2327	ribosome;
CDS_2328	nucleus;
CDS_2335	nucleus;
CDS_2351	extracellular region;
CDS_2353	spliceosomal complex;
CDS_2354	spliceosomal complex;
CDS_2358	cytoplasm;
CDS_2361	intracellular;
CDS_2371	cytoplasm;
CDS_2374	integral to membrane;
CDS_2388	plasma membrane; integral to membrane;
CDS_2391	nuclear pore;
CDS_2392	nuclear pore;
CDS_2394	cytoplasm;
CDS_2395	vacuole; plasma membrane;
CDS_2400	nucleus;
CDS_2406	integral to membrane;
CDS_2418	nucleolus; ribonucleoprotein complex;
CDS_2422	Golgi apparatus; endoplasmic reticulum;
CDS_2425	cytoplasm;
CDS_2430	membrane;
CDS_2433	integral to membrane; proton-transporting ATP synthase complex, coupling factor F(o);
CDS_2439	endoplasmic reticulum;
CDS_2449	ribosome;
CDS_2454	ribosome;
CDS_2469	ribosome;
CDS_2470	ribosome;
CDS_2473	nucleus;
CDS_2484	integral to membrane;
CDS_2486	ribosome;
CDS_2494	nucleosome; nucleus;
CDS_2495	integral to membrane;
CDS_2498	intracellular;
CDS_2501	ribosome;
CDS_2512	membrane;
CDS_2514	membrane;
CDS_2520	ribosome;
CDS_2527	ribosome;
CDS_2536	cytosol; cell wall; mitochondrion; nucleolus; plasma membrane; apoplast;
CDS_2538	integral to membrane;
CDS_2546	ribosome;
CDS_2547	cytosolic large ribosomal subunit;
CDS_2552	ribosome;
CDS_2553	ribosome;
CDS_2554	U4/U6 x U5 tri-snRNP complex;
CDS_2558	nucleus;
CDS_2566	membrane;
CDS_2573	integral to membrane;
CDS_2579	cytoplasm;
CDS_2581	mitochondrion; chloroplast;
CDS_2585	nucleolus;
CDS_2595	proton-transporting V-type ATPase, V0 domain;
CDS_2596	cytoplasm;
CDS_2599	ribosome;
CDS_2604	mitochondrial membrane;
CDS_2611	ribonucleoprotein complex; nucleus;
CDS_2614	integral to membrane;
CDS_2620	intracellular;
CDS_2623	ribosome;
CDS_2625	nucleus;
CDS_2631	chloroplast;
CDS_2634	ribosome;
CDS_2637	mitochondrion;
CDS_2649	protein phosphatase type 2A complex;
CDS_2660	nucleus;
CDS_2661	cytosol; root hair tip; membrane; nucleus;
CDS_2664	mitochondrion;
CDS_2666	COPI vesicle coat;
CDS_2669	intracellular;
CDS_2675	integral to membrane;
CDS_2679	integral to membrane;
CDS_2680	integral to membrane;
CDS_2683	integral to membrane;
CDS_2684	nucleolus; cytosolic ribosome; plasma membrane; chloroplast;
CDS_2691	integral to membrane;
CDS_2694	cytoplasm;
CDS_2709	ribosome;
CDS_2710	ribosome;
CDS_2718	Golgi transport complex;
CDS_2719	clathrin coat of coated pit; clathrin coat of trans-Golgi network vesicle;
CDS_2722	integral to membrane;
CDS_2723	integral to membrane;
CDS_2728	membrane;
CDS_2740	1,3-beta-D-glucan synthase complex;
CDS_2742	large ribosomal subunit;
CDS_2743	integral to membrane;
CDS_2746	intracellular; membrane;
CDS_2754	ribosome;
CDS_2763	peroxisome;
CDS_2765	cytoplasm;
CDS_2768	membrane;
CDS_2772	membrane;
CDS_2774	ribosome;
CDS_2778	plasma membrane; integral to membrane;
CDS_2779	nucleus;
CDS_2788	integral to membrane;
CDS_2793	ribonucleoprotein complex;
CDS_2794	integral to membrane; signal peptidase complex;
CDS_2797	mitochondrial inner membrane; integral to membrane;
CDS_2799	cytoplasm;
CDS_2800	cytoplasm;
CDS_2821	cytoplasm;
CDS_2822	intracellular;
CDS_2823	membrane;
CDS_2825	nucleus;
CDS_2828	mitochondrial inner membrane;
CDS_2833	membrane;
CDS_2834	nucleus;
CDS_2836	nucleus; cytoplasm;
CDS_2837	cytoplasm;
CDS_2857	eukaryotic translation initiation factor 2 complex;
CDS_2858	eukaryotic translation initiation factor 2 complex;
CDS_2862	nucleosome; nucleus;
CDS_2863	cytoplasm;
CDS_2864	eukaryotic translation initiation factor 3 complex;
CDS_2865	eukaryotic translation initiation factor 3 complex;
CDS_2866	extracellular region;
CDS_2875	mitochondrial matrix;
CDS_2878	membrane;
CDS_2879	membrane;
CDS_2885	phosphopyruvate hydratase complex;
CDS_2897	integral to membrane;
CDS_2901	proton-transporting V-type ATPase, V0 domain; integral to membrane;
CDS_2906	extracellular region;
CDS_2907	integral to membrane;
CDS_2909	intracellular;
CDS_2916	chloroplast;
CDS_2924	intracellular;
CDS_2925	ribosome;
CDS_2926	Ino80 complex;
CDS_2927	chloroplast;
CDS_2931	ribosome;
CDS_2932	large ribosomal subunit;
CDS_2933	integral to membrane;
CDS_2943	cytoplasm;
CDS_2947	integral to membrane;
CDS_2951	cytoplasm;
CDS_2952	membrane;
CDS_2954	membrane;
CDS_2961	integral to membrane;
CDS_2963	nucleoplasm; centriole; nucleoid; nucleolus; viral integration complex; DNA topoisomerase complex (ATP-hydrolyzing); synaptonemal complex;
CDS_2981	ribosome;
CDS_2987	ribosome;
CDS_2996	membrane;
CDS_3000	integral to membrane;
CDS_3004	membrane;
CDS_3005	ribosome;
CDS_3006	nucleus;
CDS_3008	cytoplasm;
CDS_3014	integral to membrane;
CDS_3015	cell surface; phosphopyruvate hydratase complex; extracellular region;
CDS_3023	integral to membrane;
CDS_3025	cytosolic large ribosomal subunit;
CDS_3029	ribosome;
CDS_3031	cytoskeleton; cytoplasm;
CDS_3032	cytoskeleton; cytoplasm;
CDS_3041	nucleus;
CDS_3050	ribosome;
CDS_3057	RNA polymerase complex;
CDS_3058	transcription factor TFIIA complex;
CDS_3059	cytoplasm;
CDS_3065	ribosome;
CDS_3069	spliceosomal complex;
CDS_3080	ubiquitin ligase complex;
CDS_3082	clathrin coat of coated pit; clathrin coat of trans-Golgi network vesicle;
CDS_3084	intracellular;
CDS_3091	integral to membrane;
CDS_3095	ribosome;
CDS_3107	ribosome;
CDS_3108	nucleus;
CDS_3111	integral to membrane;
CDS_3114	core TFIIH complex;
CDS_3117	membrane;
CDS_3119	proton-transporting two-sector ATPase complex, catalytic domain;
CDS_3120	proton-transporting two-sector ATPase complex, catalytic domain;
CDS_3122	membrane;
CDS_3128	nucleus;
CDS_3129	membrane;
CDS_3130	membrane;
CDS_3134	respiratory chain; integral to membrane; mitochondrion;
CDS_3139	integral to membrane;
CDS_3147	integral to membrane;
CDS_3148	proton-transporting V-type ATPase, V1 domain;
CDS_3149	COPII vesicle coat;
CDS_3152	proton-transporting V-type ATPase, V0 domain; vacuolar membrane; integral to membrane;
CDS_3153	integral to membrane;
CDS_3165	nucleus;
CDS_3167	membrane;
CDS_3171	membrane;
CDS_3173	Golgi apparatus; integral to membrane;
CDS_3175	vacuole; proton-transporting V-type ATPase, V0 domain;
CDS_3178	nucleus;
CDS_3185	proteasome regulatory particle, base subcomplex;
CDS_3186	proteasome regulatory particle, base subcomplex;
CDS_3192	nucleus;
CDS_3194	nucleus;
CDS_3202	ribosome;
CDS_3205	integral to membrane; plasma membrane;
CDS_3206	intracellular;
CDS_3218	cytoplasm;
CDS_3219	cytoplasm;
CDS_3221	eukaryotic translation elongation factor 1 complex;
CDS_3226	membrane;
CDS_3229	membrane;
CDS_3231	integral to membrane;
CDS_3233	integral to membrane;
CDS_3242	ribosome;
CDS_3247	ribosome;
CDS_3248	ribosome;
CDS_3251	mitochondrial respiratory chain complex III;
CDS_3258	ribosome;
CDS_3260	plasma membrane; integral to membrane;
CDS_3267	integral to membrane;
CDS_3269	cytoplasm; nucleus;
CDS_3272	ribosome; mitochondrion;
CDS_3273	ribosome; mitochondrion;
CDS_3278	Golgi apparatus; integral to membrane;
CDS_3281	cytoplasm; proteasome core complex; nucleus;
CDS_3285	integral to membrane;
CDS_3302	intracellular;
CDS_3306	clathrin coat;
CDS_3310	proton-transporting V-type ATPase, V1 domain;
CDS_3314	ubiquitin ligase complex;
CDS_3320	extracellular region; membrane;
CDS_3326	intracellular;
CDS_3332	membrane;
CDS_3335	integral to membrane; plasma membrane;
CDS_3348	membrane;
CDS_3349	vacuolar proton-transporting V-type ATPase complex;
CDS_3368	cytoplasm;
CDS_3378	ribosome;
CDS_3380	intracellular;
CDS_3387	apoplast; cell wall;
CDS_3388	membrane;
CDS_3390	nucleus;
CDS_3404	membrane;
CDS_3405	cytoplasm;
CDS_3406	cytoplasm;
CDS_3415	intracellular;
CDS_3416	nucleus;
CDS_3420	Golgi stack;
CDS_3426	nucleus;
CDS_3429	chloroplast; membrane;
CDS_3452	intracellular;
CDS_3467	membrane;
CDS_3473	ribosome;
CDS_3477	box H/ACA snoRNP complex;
CDS_3490	protein farnesyltransferase complex;
CDS_3493	mitochondrion;
CDS_3498	integral to membrane;
CDS_3502	cytoplasm;
CDS_3504	cytoplasm;
CDS_3505	nucleus;
CDS_3506	protein phosphatase type 2A complex;
CDS_3509	integral to membrane;
CDS_3515	membrane;
CDS_3517	ribosome;
CDS_3523	cytoplasm;
CDS_3536	integral to peroxisomal membrane;
CDS_3544	SAGA-type complex;
CDS_3555	cytoplasm;
CDS_3563	nucleosome; nucleus;
CDS_3565	cytoplasm; bacterial nucleoid;
CDS_3566	actin cytoskeleton;
CDS_3572	cullin-RING ubiquitin ligase complex;
CDS_3588	integral to membrane;
CDS_3590	ribosome;
CDS_3592	nucleus;
CDS_3594	membrane;
CDS_3595	integral to membrane;
CDS_3600	ribosome;
CDS_3604	nucleolus; ribonucleoprotein complex;
CDS_3614	cytoplasm;
CDS_3616	membrane;
CDS_3621	proteasome complex;
CDS_3626	integral to membrane;
CDS_3629	outer membrane;
CDS_3636	cytoplasm;
CDS_3638	nuclear cap binding complex;
CDS_3639	cytoplasm;
CDS_3641	microtubule associated complex;
CDS_3642	proteasome complex;
CDS_3643	proteasome complex;
CDS_3645	outer membrane;
CDS_3656	membrane;
CDS_3659	proteasome regulatory particle, base subcomplex;
CDS_3660	intracellular;
CDS_3667	nucleolus; cytosolic large ribosomal subunit; mitochondrion;
CDS_3674	intracellular;
CDS_3676	membrane;
CDS_3678	proton-transporting two-sector ATPase complex, catalytic domain;
CDS_3679	nucleus;
CDS_3680	nucleus;
CDS_3691	endoplasmic reticulum membrane;
CDS_3693	ribosome;
CDS_3696	anaphase-promoting complex;
CDS_3704	mitochondrial respiratory chain complex IV;
CDS_3708	cytoplasm;
CDS_3712	plasma membrane;
CDS_3715	large ribosomal subunit;
CDS_3718	membrane;
CDS_3721	membrane;
CDS_3727	membrane; chloroplast;
CDS_3735	integral to membrane; endoplasmic reticulum;
CDS_3739	integral to membrane;
CDS_3743	proton-transporting V-type ATPase, V1 domain;
CDS_3745	nucleus;
CDS_3746	nucleus;
CDS_3756	chloroplast membrane;
CDS_3767	integral to membrane; cytoplasm;
CDS_3772	DNA-directed RNA polymerase III complex;
CDS_3784	microtubule; phragmoplast;
CDS_3794	integral to plasma membrane;
CDS_3800	outer membrane;
CDS_3806	ribosome;
CDS_3809	integral to membrane;
CDS_3812	integral to membrane; cytoplasm;
CDS_3813	integral to membrane;
CDS_3814	Golgi transport complex;
CDS_3818	integral to membrane;
CDS_3820	apoplast; cell wall;
CDS_3821	oligosaccharyltransferase complex;
CDS_3823	membrane;
CDS_3824	ribosome;
CDS_3825	ribosome;
CDS_3826	peroxisome;
CDS_3827	CCAAT-binding factor complex;
CDS_3832	integral to membrane;
CDS_3834	nucleolus;
CDS_3836	acetyl-CoA carboxylase complex;
CDS_3837	integral to membrane;
CDS_3846	intracellular;
CDS_3849	membrane;
CDS_3853	ribonucleoprotein complex;
CDS_3856	integral to membrane;
CDS_3859	cytoplasm; nucleolus;
CDS_3876	COPI vesicle coat;
CDS_3878	extracellular space;
CDS_3887	membrane;
CDS_3906	ribosome;
CDS_3907	nucleus;
CDS_3913	cytoplasm;
CDS_3917	endoplasmic reticulum membrane;
CDS_3918	integral to membrane;
CDS_3922	microtubule; cytoplasm;
CDS_3930	membrane;
CDS_3932	nucleosome; nucleus;
CDS_3934	nucleus;
CDS_3936	Golgi membrane; integral to membrane; cis-Golgi network;
CDS_3945	integral to membrane;
CDS_3947	cullin-RING ubiquitin ligase complex;
CDS_3966	microtubule associated complex; microtubule;
CDS_3970	nucleus;
CDS_3971	ribosome;
CDS_3974	COPII vesicle coat;
CDS_3987	cytoplasm;
CDS_3990	spliceosomal complex;
CDS_3994	proteasome regulatory particle;
CDS_3996	cytoplasm;
CDS_3999	cytoplasm;
CDS_4000	large ribosomal subunit;
CDS_4025	integral to membrane;
CDS_4031	cytoplasm;
CDS_4038	ribosome;
CDS_4039	cytoplasm;
CDS_4066	transcription factor complex;
CDS_4067	cytoplasm;
CDS_4070	intracellular;
CDS_4078	nucleus;
CDS_4079	membrane;
CDS_4081	cytoskeleton;
CDS_4082	integral to membrane;
CDS_4083	integral to membrane;
CDS_4087	mitochondrion;
CDS_4091	nucleus;
CDS_4103	nucleus;
CDS_4105	nucleus;
CDS_4107	cytoplasm;
CDS_4115	integral to membrane;
CDS_4117	plasma membrane; integral to membrane;
CDS_4147	microtubule;
CDS_4151	peroxisomal membrane;
CDS_4155	ribonucleoprotein complex; nucleus;
CDS_4160	integral to membrane;
CDS_4164	nucleosome; nucleus;
CDS_4166	membrane; cytosol; stereocilium;
CDS_4178	plasma membrane; integral to membrane;
CDS_4180	cytoplasm;
CDS_4223	proton-transporting V-type ATPase, V1 domain;
CDS_4225	nucleus;
CDS_4229	integral to membrane;
CDS_4267	ribosome;
CDS_4268	ribosome;
CDS_4275	integral to membrane;
CDS_4277	signal recognition particle;
CDS_4278	integral to membrane; signal peptidase complex;
CDS_4279	integral to membrane; signal peptidase complex;
CDS_4283	cytoplasm;
CDS_4290	cytoplasm;
CDS_4291	glycerol-3-phosphate dehydrogenase complex;
CDS_4300	integral to membrane;
CDS_4308	integral to membrane;
CDS_4314	integral to membrane;
CDS_4324	integral to membrane;
CDS_4325	core TFIIH complex;
CDS_4330	cytoplasm; proteasome core complex, alpha-subunit complex; nucleus;
CDS_4342	intracellular;
CDS_4351	intracellular;
CDS_4353	chloroplast;
CDS_4357	nucleus;
CDS_4360	cytoplasm;
CDS_4370	integral to membrane;
CDS_4372	cytoplasm;
CDS_4373	integral to membrane;
CDS_4374	cytoplasm;
CDS_4383	chloroplast;
CDS_4385	exocyst;
CDS_4396	RNA polymerase complex;
CDS_4397	endoplasmic reticulum membrane;
CDS_4403	cytoplasm;
CDS_4420	integral to membrane;
CDS_4425	ribosome;
CDS_4427	core TFIIH complex;
CDS_4434	membrane;
CDS_4437	CCAAT-binding factor complex;
CDS_4438	nucleus;
CDS_4439	vacuole; chloroplast; nucleolus; plasma membrane; mitochondrion;
CDS_4452	integral to membrane; plasma membrane;
CDS_4457	integral to membrane;
CDS_4460	nucleus;
CDS_4468	cytoplasm; proteasome core complex; nucleus;
CDS_4490	ribosome;
CDS_4492	cytoplasm;
CDS_4511	nucleus;
CDS_4514	membrane;
CDS_4519	ribosome;
CDS_4523	nucleus;
CDS_4525	intracellular;
CDS_4533	nucleus;
CDS_4539	large ribosomal subunit;
CDS_4542	integral to membrane;
CDS_4543	integral to membrane;
CDS_4546	plastid;
CDS_4550	nucleus;
CDS_4570	nucleolus; cytosolic small ribosomal subunit; mitochondrion;
CDS_4572	intracellular;
CDS_4573	integral to membrane;
CDS_4574	eukaryotic translation elongation factor 1 complex;
CDS_4583	integral to membrane;
CDS_4602	microtubule organizing center; spindle pole;
CDS_4603	plasma membrane; cell wall; chloroplast; mitochondrion;
CDS_4604	mitochondrial outer membrane;
CDS_4606	nucleus;
CDS_4609	membrane;
CDS_4613	integral to membrane;
CDS_4630	ribosome;
CDS_4631	integral to membrane;
CDS_4632	nucleus;
CDS_4637	cytoplasm;
CDS_4640	cytoplasm; proteasome core complex, alpha-subunit complex; nucleus;
CDS_4646	cytoplasm;
CDS_4652	integral to membrane;
CDS_4656	clathrin adaptor complex;
CDS_4658	ribosome;
CDS_4659	ribosome;
CDS_4669	nucleus;
CDS_4677	integral to membrane;
CDS_4681	chloroplast stroma;
CDS_4689	cytosolic ribosome; vacuole; proteasome core complex, alpha-subunit complex; nucleus;
CDS_4698	membrane;
CDS_4714	cytoplasm;
CDS_4719	integral to membrane;
CDS_4727	membrane;
CDS_4736	nucleus;
CDS_4737	integral to membrane;
CDS_4738	integral to membrane;
CDS_4740	membrane;
CDS_4749	integral to membrane;
CDS_4752	cytoplasm;
CDS_4753	cytoplasm;
CDS_4763	cytoskeleton; cytoplasm;
CDS_4767	nucleus;
CDS_4782	mediator complex;
CDS_4785	mitochondrion; integral to membrane; proton-transporting ATP synthase complex, coupling factor F(o);
CDS_4788	cytoplasm; nucleus;
CDS_4800	plastid;
CDS_4812	ubiquitin ligase complex;
CDS_4820	integral to membrane; plant-type cell wall; Golgi apparatus;
CDS_4824	Golgi apparatus; integral to membrane;
CDS_4830	transcription factor TFIIF complex;
CDS_4834	cytoplasm;
CDS_4853	vacuole;
CDS_4861	mitochondrion; integral to membrane; proton-transporting ATP synthase complex, coupling factor F(o);
CDS_4868	integral to membrane; Gram-negative-bacterium-type cell wall;
CDS_4883	integral to membrane;
CDS_4886	intracellular;
CDS_4889	chloroplast;
CDS_4890	nucleus;
CDS_4896	cytoskeleton; cytoplasm;
CDS_4912	nucleus;
CDS_4929	ribosome;
CDS_4934	endoplasmic reticulum;
CDS_4945	spliceosomal complex;
CDS_4946	membrane;
CDS_4947	membrane;
CDS_4948	ubiquitin ligase complex;
CDS_4952	integral to membrane;
CDS_4953	intracellular; plasma membrane;
CDS_4955	nucleus;
CDS_4963	integral to membrane;
CDS_4964	cytoplasm;
CDS_4965	mitochondrial ribosome;
CDS_4966	nucleus;
CDS_4982	integral to membrane;
CDS_4986	integral to membrane;
CDS_4987	integral to membrane;
CDS_4998	nucleus;
CDS_4999	nucleus;
CDS_5003	cytosol;
CDS_5008	integral to membrane;
CDS_5018	nucleus;
CDS_5026	condensed nuclear chromosome;
CDS_5030	nucleus;
CDS_5039	integral to membrane;
CDS_5042	intracellular;
CDS_5051	nucleus;
CDS_5054	endoplasmic reticulum membrane;
CDS_5058	Piccolo NuA4 histone acetyltransferase complex;
CDS_5059	ribosome;
CDS_5063	cytoplasm; proteasome core complex; nucleus;
CDS_5064	cytoplasm; proteasome core complex; nucleus;
CDS_5066	membrane;
CDS_5076	intracellular;
CDS_5082	mitochondrial matrix;
CDS_5088	COPI vesicle coat;
CDS_5089	apoplast; cell wall;
CDS_5091	integral to membrane;
CDS_5106	Golgi apparatus; integral to membrane;
CDS_5118	intracellular;
CDS_5119	integral to membrane;
CDS_5125	membrane;
CDS_5132	postsynaptic membrane; integral to membrane;
CDS_5136	cytoplasm;
CDS_5144	integral to membrane;
CDS_5155	chloroplast;
CDS_5160	membrane;
CDS_5162	intracellular;
CDS_5167	signal recognition particle;
CDS_5168	cytoplasm; nucleus;
CDS_5182	core TFIIH complex;
CDS_5202	integral to membrane;
CDS_5210	ribosome;
CDS_5212	integral to membrane;
CDS_5213	chloroplast;
CDS_5220	ribosome;
CDS_5228	nucleus;
CDS_5230	nucleus;
CDS_5239	nucleolus; cytosolic small ribosomal subunit; mitochondrion;
CDS_5244	nuclear pore;
CDS_5245	membrane;
CDS_5248	intracellular;
CDS_5252	integral to endoplasmic reticulum membrane;
CDS_5258	integral to membrane; endoplasmic reticulum;
CDS_5260	signal recognition particle, endoplasmic reticulum targeting;
CDS_5277	intracellular;
CDS_5278	mitochondrial inner membrane presequence translocase complex;
CDS_5280	intracellular;
CDS_5284	integral to membrane;
CDS_5288	chloroplast;
CDS_5298	nucleus;
CDS_5308	membrane;
CDS_5313	cytoplasm;
CDS_5315	nucleolus; peroxisome; plasma membrane;
CDS_5316	cytoplasm;
CDS_5317	cytoplasm;
CDS_5319	endoplasmic reticulum;
CDS_5322	membrane;
CDS_5324	integral to membrane;
CDS_5328	nucleus;
CDS_5330	microtubule associated complex;
CDS_5347	cytoplasm;
CDS_5348	mitochondrial outer membrane;
CDS_5349	nucleus;
CDS_5352	nucleus;
CDS_5356	membrane;
CDS_5369	integral to membrane;
CDS_5378	chloroplast;
CDS_5386	endoplasmic reticulum membrane; integral to membrane;
CDS_5393	nucleus;
CDS_5400	integral to membrane;
CDS_5401	membrane;
CDS_5408	oxoglutarate dehydrogenase complex;
CDS_5410	membrane;
CDS_5419	small ribosomal subunit;
CDS_5422	membrane;
CDS_5425	integral to membrane;
CDS_5427	cytoplasm;
CDS_5431	integral to membrane;
CDS_5435	ER membrane protein complex;
CDS_5437	ribosome;
CDS_5439	membrane coat;
CDS_5441	integral to membrane;
CDS_5447	cytoplasm;
CDS_5448	cullin-RING ubiquitin ligase complex;
CDS_5477	nucleus;
CDS_5503	intracellular;
CDS_5504	ribosome;
CDS_5506	integral to membrane;
CDS_5511	integral to membrane;
CDS_5516	Arp2/3 protein complex;
CDS_5522	ribonucleoprotein complex; nucleus;
CDS_5535	integral to membrane;
CDS_5559	integral to membrane;
CDS_5563	cytoplasm;
CDS_5565	acetyl-CoA carboxylase complex;
CDS_5567	chloroplast;
CDS_5568	integral to membrane;
CDS_5570	core TFIIH complex;
CDS_5581	chloroplast;
CDS_5583	membrane;
CDS_5586	nucleus;
CDS_5590	large ribosomal subunit;
CDS_5600	membrane;
CDS_5603	cytoplasm; proteasome core complex; nucleus;
CDS_5605	Golgi stack;
CDS_5608	nucleus;
CDS_5610	nucleus;
CDS_5614	chloroplast envelope; chloroplast stroma;
CDS_5647	membrane;
CDS_5651	integral to membrane;
CDS_5655	ribosome;
CDS_5657	nucleolus; plasma membrane; cytosolic large ribosomal subunit; chloroplast;
CDS_5659	integral to membrane;
CDS_5666	membrane;
CDS_5670	intracellular;
CDS_5674	integral to membrane;
CDS_5675	ribosome;
CDS_5676	nucleus;
CDS_5678	Golgi apparatus; integral to membrane;
CDS_5692	plasma membrane; integral to membrane;
CDS_5695	integral to membrane; mitochondrial membrane;
CDS_5696	ubiquitin ligase complex;
CDS_5699	nucleus;
CDS_5703	plasma membrane;
CDS_5713	nuclear pore;
CDS_5714	apoplast; cell wall;
CDS_5730	mitochondrial outer membrane translocase complex;
CDS_5737	nucleus;
CDS_5738	integral to membrane; signal peptidase complex;
CDS_5748	mitochondrial matrix;
CDS_5749	nucleus;
CDS_5751	oxygen evolving complex; thylakoid membrane;
CDS_5761	endoplasmic reticulum;
CDS_5768	integral to membrane;
CDS_5770	cytosol; root hair tip; membrane; nucleus;
CDS_5773	nucleus;
CDS_5782	cell wall;
CDS_5804	integral to membrane;
CDS_5814	integral to membrane;
CDS_5816	prefoldin complex;
CDS_5818	cytoplasm;
CDS_5820	membrane;
CDS_5823	nucleus;
CDS_5824	nucleus;
CDS_5826	nucleus; cytosol;
CDS_5831	ribonucleoside-diphosphate reductase complex;
CDS_5851	membrane;
CDS_5852	intracellular;
CDS_5859	integral to membrane;
CDS_5860	ribosome;
CDS_5865	intracellular;
CDS_5877	integral to membrane;
CDS_5881	Golgi membrane;
CDS_5883	integral to membrane;
CDS_5888	integral to membrane;
CDS_5889	nucleosome; nucleus;
CDS_5890	intracellular;
CDS_5893	proton-transporting ATP synthase complex, catalytic core F(1);
CDS_5914	integral to membrane;
CDS_5921	ubiquitin ligase complex;
CDS_5923	plasma membrane;
CDS_5926	ribosome;
CDS_5928	ubiquitin ligase complex;
CDS_5930	membrane;
CDS_5938	integral to membrane;
CDS_5942	large ribosomal subunit;
CDS_5945	nucleus;
CDS_5946	integral to membrane; endoplasmic reticulum;
CDS_5949	nucleosome; nucleus;
CDS_5956	intracellular;
CDS_5962	Golgi cisterna membrane; integral to membrane;
CDS_5963	integral to membrane;
CDS_5984	membrane;
CDS_5985	membrane;
CDS_6000	integral to membrane;
CDS_6001	integral to nuclear inner membrane;
CDS_6010	cytoskeleton;
CDS_6016	protein complex; cytoplasm;
CDS_6035	small nuclear ribonucleoprotein complex;
CDS_6036	small nuclear ribonucleoprotein complex;
CDS_6040	intracellular; membrane;
CDS_6052	cytoplasm;
CDS_6067	mediator complex;
CDS_6069	integral to membrane;
CDS_6070	integral to membrane;
CDS_6071	microtubule associated complex;
CDS_6078	cis-Golgi network;
CDS_6079	cell wall;
CDS_6082	nucleus;
CDS_6083	large ribosomal subunit;
CDS_6085	large ribosomal subunit;
CDS_6093	cytoplasm;
CDS_6094	intracellular;
CDS_6103	extracellular region; membrane;
CDS_6107	integral to membrane;
CDS_6109	plasma membrane; integral to membrane;
CDS_6118	integral to membrane;
CDS_6136	microtubule associated complex;
CDS_6140	membrane;
CDS_6145	integral to membrane;
CDS_6147	nucleus;
CDS_6148	protein complex; cytoplasm;
CDS_6153	membrane;
CDS_6156	vacuole;
CDS_6162	integral to membrane;
CDS_6185	nucleus;
CDS_6186	cytoplasm;
CDS_6194	membrane;
CDS_6197	nucleus;
CDS_6208	cytoplasm;
CDS_6209	cytoplasm;
CDS_6210	nucleus;
CDS_6213	nucleus;
CDS_6215	membrane;
CDS_6218	nucleolus;
CDS_6228	cytoplasm;
CDS_6237	H4/H2A histone acetyltransferase complex;
CDS_6253	nucleus;
CDS_6255	intracellular;
CDS_6256	integral to membrane;
CDS_6264	Golgi membrane; integral to membrane;
CDS_6275	clathrin coat of coated pit; clathrin coat of trans-Golgi network vesicle;
CDS_6276	ribosome;
CDS_6280	ubiquitin ligase complex;
CDS_6289	membrane;
CDS_6291	extracellular region;
CDS_6310	integral to membrane;
CDS_6312	membrane;
CDS_6320	nucleus;
CDS_6331	integral to membrane;
CDS_6337	endoplasmic reticulum membrane;
CDS_6338	endoplasmic reticulum membrane;
CDS_6339	nucleus;
CDS_6340	integral to membrane;
CDS_6347	membrane;
CDS_6356	chloroplast;
CDS_6361	membrane;
CDS_6363	integral to membrane;
CDS_6369	ubiquitin ligase complex;
CDS_6379	microtubule;
CDS_6389	integral to membrane; cytoplasm;
CDS_6390	intracellular;
CDS_6393	integral to membrane;
CDS_6395	integral to membrane;
CDS_6398	ribosome;
CDS_6402	clathrin coat;
CDS_6403	integral to membrane;
CDS_6407	peroxisome;
CDS_6409	integral to membrane;
CDS_6434	nucleus;
CDS_6442	membrane;
CDS_6444	mitochondrial proton-transporting ATP synthase complex, coupling factor F(o);
CDS_6455	membrane;
CDS_6481	intracellular;
CDS_6492	plasma membrane; integral to membrane;
CDS_6500	nucleus;
CDS_6502	spliceosomal complex;
CDS_6511	mitochondrion;
CDS_6542	nuclear pore;
CDS_6553	intracellular;
CDS_6561	cytoplasm;
CDS_6562	integral to membrane;
CDS_6564	signal recognition particle;
CDS_6574	extrachromosomal circular DNA;
CDS_6576	integral to membrane; plasma membrane;
CDS_6583	Golgi cisterna membrane; integral to membrane;
CDS_6586	Ku70:Ku80 complex;
CDS_6599	cytoplasm; nucleus;
CDS_6602	intracellular;
CDS_6604	chloroplast;
CDS_6606	integral to Golgi membrane;
CDS_6607	nucleus;
CDS_6653	intracellular;
CDS_6655	cytoskeleton;
CDS_6662	endoplasmic reticulum;
CDS_6668	membrane;
CDS_6672	apoplast; cell wall;
CDS_6677	integral to membrane;
CDS_6680	ribosome;
CDS_6682	membrane;
CDS_6691	integral to membrane;
CDS_6698	cytoplasm;
CDS_6699	nucleus;
CDS_6700	ribosome;
CDS_6704	integral to membrane;
CDS_6707	endoplasmic reticulum membrane;
CDS_6716	membrane coat;
CDS_6722	integral to membrane;
CDS_6730	intracellular;
CDS_6732	ubiquitin ligase complex;
CDS_6747	cytoplasm;
CDS_6756	vacuolar proton-transporting V-type ATPase, V1 domain;
CDS_6770	integral to membrane; endoplasmic reticulum;
CDS_6784	nucleolus; cytosolic large ribosomal subunit; mitochondrion;
CDS_6785	integral to membrane;
CDS_6787	Golgi membrane; integral to membrane; cis-Golgi network;
CDS_6794	nucleus;
CDS_6796	nucleus;
CDS_6804	nucleus;
CDS_6807	integral to membrane; endoplasmic reticulum;
CDS_6810	membrane;
CDS_6812	peroxisome;
CDS_6813	integral to membrane;
CDS_6816	signal recognition particle receptor complex;
CDS_6821	intracellular;
CDS_6833	oxygen evolving complex; extrinsic to membrane;
CDS_6843	integral to membrane; peroxisomal membrane;
CDS_6869	membrane;
CDS_6877	integral to membrane;
CDS_6880	vacuole; endoplasmic reticulum lumen; aleurone grain;
CDS_6885	integral to membrane; plasma membrane;
CDS_6886	integral to membrane;
CDS_6895	membrane coat;
CDS_6896	membrane coat;
CDS_6898	cytoplasm;
CDS_6899	cytosol; plasma membrane;
CDS_6909	chromosome, centromeric region; nucleus;
CDS_6911	exosome (RNase complex);
CDS_6912	chloroplast envelope; plasma membrane;
CDS_6914	extrachromosomal circular DNA;
CDS_6918	cytoplasm;
CDS_6940	endoplasmic reticulum membrane;
CDS_6946	transcription factor complex;
CDS_6948	membrane;
CDS_6960	cytoplasm;
CDS_6971	cytoplasm;
CDS_6983	glycine cleavage complex;
CDS_6999	cytoplasm;
CDS_7001	integral to plasma membrane;
CDS_7004	mitochondrial outer membrane translocase complex;
CDS_7005	intracellular;
CDS_7006	intracellular;
CDS_7023	ribosome;
CDS_7032	membrane;
CDS_7044	intracellular;
CDS_7048	integral to membrane;
CDS_7051	nucleolus; ribonucleoprotein complex;
CDS_7052	ribosome;
CDS_7058	ubiquitin ligase complex;
CDS_7061	signal recognition particle;
CDS_7065	integral to membrane;
CDS_7068	membrane;
CDS_7081	protein complex;
CDS_7098	microtubule associated complex; microtubule;
CDS_7099	integral to membrane;
CDS_7106	proteasome core complex;
CDS_7135	integral to membrane;
CDS_7140	cytoplasm;
CDS_7147	membrane;
CDS_7150	integral to membrane;
CDS_7164	integral to membrane;
CDS_7182	ribosome;
CDS_7189	membrane;
CDS_7210	intracellular;
CDS_7215	chloroplast outer membrane; peribacteroid membrane;
CDS_7218	intracellular;
CDS_7222	ribosome;
CDS_7225	intracellular; integral to membrane;
CDS_7232	integral to membrane;
CDS_7234	Golgi membrane; integral to membrane;
CDS_7244	nucleosome; nucleus;
CDS_7253	integral to membrane;
CDS_7266	apoplast; cell wall;
CDS_7269	nucleus;
CDS_7289	cytoplasm; nucleus;
CDS_7293	proton-transporting ATP synthase complex, catalytic core F(1);
CDS_7329	nucleus;
CDS_7332	cytoplasm;
CDS_7342	chloroplast;
CDS_7345	membrane;
CDS_7350	cytoplasmic membrane-bounded vesicle; mitochondrion;
CDS_7352	integral to membrane;
CDS_7355	cytoplasm;
CDS_7366	ribosome;
CDS_7372	intracellular;
CDS_7374	nucleus;
CDS_7375	mitochondrial inner membrane; integral to membrane;
CDS_7376	cytoplasm;
CDS_7378	integral to plasma membrane;
CDS_7393	intracellular;
CDS_7404	cytoplasm;
CDS_7407	membrane;
CDS_7433	proton-transporting V-type ATPase, V1 domain;
CDS_7439	ribosome;
CDS_7449	cytoplasm;
CDS_7467	intracellular;
CDS_7474	COPI vesicle coat;
CDS_7484	nucleus;
CDS_7485	protein phosphatase type 2A complex;
CDS_7491	clathrin adaptor complex;
CDS_7525	nucleus;
CDS_7531	integral to membrane;
CDS_7533	integral to membrane;
CDS_7535	membrane;
CDS_7536	membrane;
CDS_7540	cytoplasm;
CDS_7542	vacuole; plasma membrane;
CDS_7544	integral to plasma membrane;
CDS_7560	Type I site-specific deoxyribonuclease complex;
CDS_7581	nucleus;
CDS_7583	membrane;
CDS_7585	Arp2/3 protein complex;
CDS_7586	cytoplasm;
CDS_7604	integral to membrane;
CDS_7606	nucleus;
CDS_7607	nucleus;
CDS_7612	spliceosomal complex;
CDS_7624	ribosome;
CDS_7626	intracellular;
CDS_7640	COPI vesicle coat;
CDS_7641	integral to membrane;
CDS_7649	chromosome; nucleus;
CDS_7671	integral to membrane; intracellular; plasma membrane;
CDS_7685	membrane;
CDS_7686	ribosome;
CDS_7693	transcription factor TFIIE complex;
CDS_7703	plasma membrane;
CDS_7710	nucleosome; nucleus;
CDS_7713	integral to membrane;
CDS_7714	endoplasmic reticulum lumen;
CDS_7716	plasma membrane;
CDS_7722	mitochondrial matrix;
CDS_7724	membrane;
CDS_7726	extrinsic to membrane; plasma membrane; endoplasmic reticulum exit site; nucleus; cytosol;
CDS_7730	integral to membrane;
CDS_7735	nucleus;
CDS_7737	integral to membrane;
CDS_7743	membrane;
CDS_7749	cytoplasm;
CDS_7768	nucleus;
CDS_7773	intracellular;
CDS_7785	intracellular;
CDS_7786	integral to membrane;
CDS_7788	spliceosomal complex;
CDS_7789	Golgi transport complex;
CDS_7792	integral to membrane; plasma membrane;
CDS_7804	integral to membrane;
CDS_7810	signal recognition particle, endoplasmic reticulum targeting;
CDS_7816	intracellular;
CDS_7822	intracellular;
CDS_7827	peroxisome;
CDS_7834	nucleus;
CDS_7837	ribosome; chloroplast; mitochondrion;
CDS_7838	large ribosomal subunit; chloroplast;
CDS_7843	nucleus;
CDS_7860	intracellular;
CDS_7865	ribosome;
CDS_7883	clathrin adaptor complex; COPI vesicle coat;
CDS_7890	membrane;
CDS_7892	integral to membrane;
CDS_7893	cytoplasm;
CDS_7896	membrane;
CDS_7905	membrane coat;
CDS_7906	nucleosome; nucleus;
CDS_7912	intrinsic to endoplasmic reticulum membrane;
CDS_7916	mitochondrial matrix;
CDS_7919	nucleus;
CDS_7936	nucleus;
CDS_7949	Golgi stack;
CDS_7950	nucleus;
CDS_7958	integral to membrane;
CDS_7996	membrane;
CDS_7997	cytosolic large ribosomal subunit;
CDS_7998	cytosolic large ribosomal subunit;
CDS_8003	nucleus;
CDS_8004	ribosome;
CDS_8007	membrane;
CDS_8012	nucleus;
CDS_8013	cytoplasm;
CDS_8016	plasma membrane; integral to membrane;
CDS_8043	cytoplasm;
CDS_8044	membrane;
CDS_8045	integral to membrane;
CDS_8046	membrane;
CDS_8048	nucleus;
CDS_8060	plasma membrane;
CDS_8061	endoplasmic reticulum membrane; integral to membrane;
CDS_8062	cytoplasm;
CDS_8076	integral to membrane; outer membrane-bounded periplasmic space;
CDS_8077	integral to membrane; outer membrane-bounded periplasmic space;
CDS_8091	intracellular;
CDS_8100	integral to membrane;
CDS_8102	membrane;
CDS_8107	intracellular;
CDS_8116	plasma membrane; integral to membrane;
CDS_8117	integral to membrane;
CDS_8132	membrane;
CDS_8136	large ribosomal subunit;
CDS_8146	plasma membrane; integral to membrane;
CDS_8147	nucleus;
CDS_8150	integral to membrane;
CDS_8153	integral to membrane;
CDS_8174	large ribosomal subunit;
CDS_8177	cytoplasm; proteasome core complex, alpha-subunit complex; nucleus;
CDS_8207	chloroplast envelope;
CDS_8235	mitochondrion; chloroplast; glutamyl-tRNA(Gln) amidotransferase complex;
CDS_8237	cytoplasm;
CDS_8243	integral to membrane;
CDS_8253	COPI vesicle coat;
CDS_8254	chloroplast; plasma membrane; mitochondrion;
CDS_8255	intracellular;
CDS_8261	membrane;
CDS_8266	intracellular;
CDS_8270	integral to membrane;
CDS_8279	cell wall; extracellular region;
CDS_8283	intracellular;
CDS_8300	chloroplast;
CDS_8303	nucleus;
CDS_8306	nucleus;
CDS_8307	nucleus;
CDS_8313	transcription factor TFIID complex;
CDS_8317	phosphopyruvate hydratase complex;
CDS_8326	nucleus;
CDS_8332	large ribosomal subunit;
CDS_8335	integral to membrane;
CDS_8339	microtubule associated complex; microtubule;
CDS_8344	cytoplasm;
CDS_8345	protein phosphatase type 2A complex;
CDS_8350	integral to membrane;
CDS_8364	integral to membrane;
CDS_8367	nucleosome; nucleus;
CDS_8369	mitochondrial inner membrane; respiratory chain; integral to membrane;
CDS_8381	integral to membrane;
CDS_8388	cytoplasm;
CDS_8395	mitochondrial proton-transporting ATP synthase complex, coupling factor F(o); integral to membrane;
CDS_8397	cytoplasm;
CDS_8403	integral to membrane;
CDS_8413	integral to membrane;
CDS_8420	intracellular;
CDS_8429	nucleus;
CDS_8435	intracellular;
CDS_8436	1,3-beta-D-glucan synthase complex;
CDS_8444	integral to membrane;
CDS_8447	nucleus;
CDS_8461	chloroplast stroma;
CDS_8464	nucleus;
CDS_8467	membrane; cell periphery;
CDS_8478	cytoplasm;
CDS_8483	extrachromosomal circular DNA;
CDS_8485	integral to membrane;
CDS_8486	6-phosphofructokinase complex;
CDS_8489	nucleus;
CDS_8492	ribonucleoside-diphosphate reductase complex;
CDS_8494	integral to membrane;
CDS_8495	integral to membrane;
CDS_8503	cytoplasm;
CDS_8520	integral to membrane;
CDS_8530	nucleus;
CDS_8540	cytoplasm;
CDS_8543	membrane;
CDS_8551	integral to membrane;
CDS_8553	intracellular;
CDS_8554	Arp2/3 protein complex;
CDS_8557	nucleus;
CDS_8564	chromosome;
CDS_8571	membrane;
CDS_8572	nucleus;
CDS_8574	intracellular;
CDS_8580	chloroplast thylakoid membrane;
CDS_8581	1,3-beta-D-glucan synthase complex;
CDS_8585	integral to membrane;
CDS_8589	intracellular;
CDS_8594	plant-type cell wall; plasma membrane;
CDS_8603	membrane; chloroplast;
CDS_8614	integral to membrane;
CDS_8617	mitochondrial intermembrane space;
CDS_8623	membrane;
CDS_8632	chloroplast;
CDS_8637	nucleus;
CDS_8642	chloroplast stroma;
CDS_8647	cytoplasm;
CDS_8667	Golgi apparatus part; clathrin adaptor complex;
CDS_8677	eukaryotic translation initiation factor 2 complex;
CDS_8680	integral to membrane;
CDS_8684	integral to membrane;
CDS_8692	intracellular;
CDS_8705	nucleus;
CDS_8708	integral to membrane;
CDS_8709	nucleus;
CDS_8710	nucleus;
CDS_8722	ribosome;
CDS_8728	chloroplast;
CDS_8736	integral to membrane;
CDS_8738	peroxisome;
CDS_8742	oxygen evolving complex; extrinsic to membrane;
CDS_8743	intracellular; membrane;
CDS_8748	integral to membrane;
CDS_8762	cytoplasm;
CDS_8763	cytoplasm;
CDS_8776	exocyst;
CDS_8785	integral to membrane;
CDS_8794	pyruvate dehydrogenase complex;
CDS_8797	membrane;
CDS_8828	nucleus;
CDS_8831	cytoplasm;
CDS_8836	Golgi membrane; integral to membrane;
CDS_8855	membrane;
CDS_8863	chromosome; nucleus;
CDS_8881	cytoplasm;
CDS_8885	extracellular region;
CDS_8891	actin cytoskeleton;
CDS_8920	proteasome complex;
CDS_8945	ribosome;
CDS_8946	large ribosomal subunit;
CDS_8956	thylakoid; chloroplast envelope;
CDS_8966	nucleus;
CDS_8968	integral to membrane; endoplasmic reticulum;
CDS_8971	ribosome;
CDS_8980	integral to membrane;
CDS_8981	membrane;
CDS_8983	membrane;
CDS_8989	mitochondrial inner membrane; respiratory chain; integral to membrane;
CDS_8999	nucleus;
CDS_9000	integral to membrane;
CDS_9001	membrane;
CDS_9003	intracellular;
CDS_9007	nucleus;
CDS_9016	ribosome;
CDS_9023	photosystem II; integral to membrane; photosystem I; chloroplast thylakoid membrane;
CDS_9025	mitochondrial inner membrane presequence translocase complex;
CDS_9038	membrane;
CDS_9039	intracellular;
CDS_9041	intracellular;
CDS_9079	proteasome core complex;
CDS_9082	intracellular;
CDS_9099	integral to membrane;
CDS_9102	plasma membrane;
CDS_9103	endoplasmic reticulum;
CDS_9104	ribosome;
CDS_9126	6-phosphofructokinase complex;
CDS_9145	integral to membrane; plasma membrane;
CDS_9146	intracellular;
CDS_9158	cytoplasm;
CDS_9166	cytoplasm;
CDS_9195	integral to membrane;
CDS_9209	membrane;
CDS_9213	THO complex part of transcription export complex;
CDS_9217	intracellular;
CDS_9218	photosystem I; mitochondrion; integral to membrane; chloroplast envelope; chloroplast thylakoid membrane; photosystem II; plastoglobule; apoplast;
CDS_9219	integral to membrane;
CDS_9221	integral to membrane;
CDS_9230	proteasome complex;
CDS_9231	integral to membrane;
CDS_9234	cytoplasm;
CDS_9242	prefoldin complex;
CDS_9252	plasma membrane; integral to membrane;
CDS_9278	integral to membrane;
CDS_9296	integral to membrane; proton-transporting ATP synthase complex, coupling factor F(o); plasma membrane;
CDS_9297	integral to membrane; proton-transporting ATP synthase complex, coupling factor F(o); plasma membrane;
CDS_9299	ribosome;
CDS_9307	integral to membrane; oligosaccharyltransferase complex;
CDS_9314	membrane;
CDS_9315	membrane;
CDS_9317	cytoplasm;
CDS_9347	integral to membrane;
CDS_9356	mitochondrial matrix;
CDS_9368	mitochondrial matrix;
CDS_9369	cytoplasm;
CDS_9374	cytoplasm; nucleus;
CDS_9383	membrane;
CDS_9390	mediator complex;
CDS_9394	integral to membrane;
CDS_9395	integral to membrane;
CDS_9402	ubiquitin ligase complex;
CDS_9404	membrane;
CDS_9405	spliceosomal complex;
CDS_9407	nucleus;
CDS_9419	chloroplast;
CDS_9420	chloroplast;
CDS_9426	endoplasmic reticulum membrane; integral to membrane;
CDS_9427	endoplasmic reticulum lumen;
CDS_9438	ribosome;
CDS_9445	Golgi apparatus; integral to membrane;
CDS_9446	Golgi apparatus; integral to membrane;
CDS_9460	Golgi apparatus; integral to membrane;
CDS_9462	clathrin adaptor complex;
CDS_9472	apoplast; cell wall;
CDS_9480	Arp2/3 protein complex;
CDS_9490	intracellular;
CDS_9497	membrane;
CDS_9523	extracellular region;
CDS_9528	nucleus;
CDS_9530	ribonucleoprotein complex;
CDS_9532	Ino80 complex;
CDS_9549	cytoplasm;
CDS_9565	cullin-RING ubiquitin ligase complex;
CDS_9576	chloroplast;
CDS_9580	integral to membrane;
CDS_9586	nucleus;
CDS_9602	eukaryotic translation initiation factor 3 complex;
CDS_9609	mismatch repair complex;
CDS_9615	membrane;
CDS_9621	cytoplasm;
CDS_9628	ribosome;
CDS_9632	cytoplasm;
CDS_9643	integral to membrane;
CDS_9658	integral to membrane;
CDS_9666	intracellular;
CDS_9668	integral to membrane;
CDS_9705	nucleus;
CDS_9708	integral to membrane;
CDS_9713	nucleus;
CDS_9714	integral to membrane;
CDS_9716	plastoglobule; chloroplast envelope; photosystem I reaction center; integral to membrane; chloroplast thylakoid membrane;
CDS_9717	photosystem I reaction center;
CDS_9734	COPII vesicle coat;
CDS_9740	intracellular;
CDS_9749	integral to membrane;
CDS_9751	clathrin adaptor complex;
CDS_9763	membrane;
CDS_9764	integral to membrane;
CDS_9782	integral to membrane;
CDS_9786	intracellular;
CDS_9798	clathrin adaptor complex;
CDS_9804	nuclear pore;
CDS_9810	extracellular region; membrane;
CDS_9816	intracellular;
CDS_9831	integral to membrane;
CDS_9832	cytoplasm;
CDS_9837	integral to membrane;
CDS_9841	extrinsic to membrane; oxygen evolving complex;
CDS_9863	cytoplasm;
CDS_9871	nucleus;
CDS_9872	integral to membrane;
CDS_9878	integral to membrane;
CDS_9894	integral to membrane;
CDS_9897	transcription factor TFIID complex;
CDS_9902	cytoplasm; nucleus;
CDS_9904	respiratory chain; mitochondrion;
CDS_9906	endoplasmic reticulum;
CDS_9909	Ku70:Ku80 complex;
CDS_9912	HAUS complex;
CDS_9919	apoplast;
CDS_9926	CCAAT-binding factor complex;
CDS_9957	cytoplasm;
CDS_9966	intracellular;
CDS_9970	integral to membrane;
CDS_9977	integral to membrane;
CDS_9985	nucleus;
CDS_9994	ribosome;
CDS_9997	integral to membrane;
CDS_10002	membrane;
CDS_10012	chloroplast thylakoid membrane;
CDS_10013	nucleus;
CDS_10017	integral to membrane; endoplasmic reticulum;
CDS_10022	integral to membrane;
CDS_10023	ribosome;
CDS_10030	cytoplasm;
CDS_10036	mitochondrion; chloroplast;
CDS_10040	retromer complex;
CDS_10047	microtubule; cytoplasm;
CDS_10065	photosystem II;
CDS_10069	integral to membrane;
CDS_10070	integral to membrane;
CDS_10074	integral to membrane;
CDS_10076	cytoplasm;
CDS_10082	small ribosomal subunit;
CDS_10084	ribosome;
CDS_10111	Golgi transport complex;
CDS_10124	nucleus;
CDS_10125	cytoplasm;
CDS_10135	integral to membrane;
CDS_10140	integral to membrane; plasma membrane;
CDS_10152	intracellular;
CDS_10155	nucleus;
CDS_10170	membrane;
CDS_10205	cytoplasm; nucleus;
CDS_10209	integral to membrane;
CDS_10218	mitochondrial inner membrane presequence translocase complex;
CDS_10222	integral to membrane;
CDS_10243	intracellular organelle;
CDS_10244	chloroplast;
CDS_10252	integral to membrane;
CDS_10253	integral to membrane;
CDS_10257	mitochondrial outer membrane;
CDS_10260	CCAAT-binding factor complex;
CDS_10262	nucleus;
CDS_10266	intracellular;
CDS_10267	COPI vesicle coat;
CDS_10276	cytoplasm;
CDS_10282	intracellular;
CDS_10287	integral to membrane;
CDS_10288	integral to membrane;
CDS_10292	integral to membrane;
CDS_10303	integral to membrane;
CDS_10311	cytoplasm;
CDS_10315	integral to membrane;
CDS_10316	clathrin adaptor complex;
CDS_10350	ribosome;
CDS_10351	membrane;
CDS_10358	nucleus;
CDS_10365	cullin-RING ubiquitin ligase complex;
CDS_10382	membrane;
CDS_10383	6-phosphofructokinase complex;
CDS_10386	membrane;
CDS_10390	proton-transporting V-type ATPase, V1 domain;
CDS_10391	proton-transporting V-type ATPase, V1 domain;
CDS_10394	integral to membrane;
CDS_10397	integral to membrane;
CDS_10404	clathrin coat;
CDS_10425	intracellular;
CDS_10426	endoplasmic reticulum;
CDS_10427	nucleus;
CDS_10430	nucleus;
CDS_10446	membrane;
CDS_10450	integral to membrane;
CDS_10460	membrane;
CDS_10470	cytoplasm;
CDS_10473	membrane;
CDS_10474	nucleus;
CDS_10475	membrane; chloroplast;
CDS_10476	cytoplasm;
CDS_10477	cytoplasm;
CDS_10478	integral to membrane;
CDS_10479	integral to membrane;
CDS_10483	cytosol; integral to endoplasmic reticulum membrane; plasmodesma; nuclear envelope;
CDS_10487	plasma membrane; integral to membrane;
CDS_10488	vacuolar proton-transporting V-type ATPase, V0 domain;
CDS_10493	nuclear pore;
CDS_10495	HslUV protease complex;
CDS_10498	cytoplasm;
CDS_10512	cytoplasm;
CDS_10521	intracellular;
CDS_10522	membrane;
CDS_10525	intracellular part;
CDS_10526	intracellular;
CDS_10536	membrane;
CDS_10537	membrane;
CDS_10543	membrane;
CDS_10544	membrane;
CDS_10565	integral to membrane;
CDS_10570	membrane;
CDS_10574	intracellular;
CDS_10594	membrane;
CDS_10604	integral to membrane;
CDS_10608	chromosome; nucleus;
CDS_10610	ribosome;
CDS_10615	proteasome complex;
CDS_10627	signal recognition particle;
CDS_10648	plasma membrane; integral to membrane; chloroplast; mitochondrial membrane;
CDS_10656	nucleus;
CDS_10661	exosome (RNase complex);
CDS_10674	ubiquitin ligase complex;
CDS_10676	nucleus;
CDS_10688	integral to membrane;
CDS_10690	protein complex;
CDS_10691	protein complex;
CDS_10708	integral to membrane;
CDS_10715	integral to membrane;
CDS_10737	cytoplasm;
CDS_10753	membrane;
CDS_10755	nucleus;
CDS_10756	nucleus;
CDS_10761	integral to membrane;
CDS_10764	protein complex; extracellular space; yolk;
CDS_10765	integral to membrane;
CDS_10770	integral to membrane;
CDS_10772	nucleus;
CDS_10775	endoplasmic reticulum;
CDS_10788	cytoplasm;
CDS_10793	ribosome;
CDS_10795	membrane;
CDS_10811	chloroplast;
CDS_10824	nuclear pore;
CDS_10828	nitrate reductase complex;
CDS_10835	nucleus;
CDS_10847	integral to peroxisomal membrane;
CDS_10859	mitochondrial outer membrane translocase complex;
CDS_10873	cytoplasm;
CDS_10888	Golgi apparatus; integral to membrane;
CDS_10896	outer membrane;
CDS_10927	nucleus;
CDS_10930	peroxisome;
CDS_10934	Golgi apparatus; integral to membrane;
CDS_10938	bacterial-type flagellum basal body;
CDS_10946	nucleus;
CDS_10951	mediator complex;
CDS_10954	endoplasmic reticulum;
CDS_10964	nucleus;
CDS_10978	protein phosphatase type 2A complex;
CDS_10979	integral to membrane; plasma membrane;
CDS_10997	chloroplast;
CDS_11009	integral to membrane;
CDS_11015	integral to membrane;
CDS_11020	RNA-induced silencing complex;
CDS_11022	nucleus;
CDS_11024	integral to membrane;
CDS_11030	integral to membrane;
CDS_11040	transcription factor TFIIA complex;
CDS_11041	plastid;
CDS_11042	cytoplasm;
CDS_11046	nucleus;
CDS_11063	mitochondrion;
CDS_11065	apoplast;
CDS_11066	outer membrane-bounded periplasmic space;
CDS_11083	microtubule associated complex; microtubule;
CDS_11086	nucleus;
CDS_11091	cell wall; nucleolus; chloroplast envelope; vacuole; cytosolic ribosome; plasma membrane; apoplast;
CDS_11102	nucleus;
CDS_11110	ribosome;
CDS_11111	cytoplasm;
CDS_11114	nucleus;
CDS_11124	ubiquitin ligase complex;
CDS_11135	integral to membrane;
CDS_11136	mitochondrial inner membrane; proton-transporting ATP synthase complex, catalytic core F(1);
CDS_11142	membrane;
CDS_11146	cytoplasm;
CDS_11150	protein phosphatase type 2A complex;
CDS_11152	nuclear pore;
CDS_11180	intracellular;
CDS_11199	nucleus;
CDS_11200	mitochondrial inner membrane; respiratory chain; integral to membrane;
CDS_11206	mitochondrion;
CDS_11207	integral to membrane;
CDS_11236	nuclear cap binding complex;
CDS_11243	cullin-RING ubiquitin ligase complex;
CDS_11244	DNA-directed RNA polymerase II, holoenzyme;
CDS_11246	cytoplasm;
CDS_11254	cytosolic ribosome; vacuole; proteasome core complex, alpha-subunit complex; nucleus;
CDS_11285	integral to membrane;
CDS_11288	microtubule;
CDS_11306	cytoplasm;
CDS_11311	integral to membrane;
CDS_11312	nucleus;
CDS_11320	cytoplasm;
CDS_11321	membrane;
CDS_11324	intracellular;
CDS_11328	nuclear pore;
CDS_11331	microtubule associated complex;
CDS_11332	cytoplasm;
CDS_11333	nucleus;
CDS_11344	integral to membrane;
CDS_11345	integral to membrane;
CDS_11352	integral to membrane;
CDS_11356	proteasome complex;
CDS_11359	thylakoid lumen; chloroplast stroma; chloroplast thylakoid membrane;
CDS_11361	prefoldin complex;
CDS_11364	cytoplasm;
CDS_11372	cytoplasm;
CDS_11380	nucleosome; nucleus;
CDS_11389	ribosome;
CDS_11390	ribosome;
CDS_11401	membrane;
CDS_11419	chloroplast;
CDS_11425	membrane; chloroplast;
CDS_11445	integral to membrane;
CDS_11447	signal recognition particle, endoplasmic reticulum targeting;
CDS_11451	ubiquitin ligase complex;
CDS_11452	nucleus;
CDS_11454	nucleus;
CDS_11456	ribosome;
CDS_11488	integral to membrane;
CDS_11490	nucleus;
CDS_11497	ribosome; chloroplast;
CDS_11515	intracellular;
CDS_11517	nucleus;
CDS_11522	extracellular region;
CDS_11537	nucleus;
CDS_11543	nucleus;
CDS_11550	nucleus;
CDS_11559	integral to membrane;
CDS_11560	nucleus;
CDS_11565	membrane;
CDS_11570	integral to membrane;
CDS_11572	membrane;
CDS_11576	chromosome; nucleus;
CDS_11582	integral to membrane;
CDS_11590	cytoplasm;
CDS_11604	membrane;
CDS_11611	nucleus;
CDS_11614	membrane;
CDS_11615	chloroplast;
CDS_11618	intracellular;
CDS_11624	integral to membrane;
CDS_11631	integral to membrane;
CDS_11634	membrane;
CDS_11643	cytoplasm;
CDS_11655	apoplast; cell wall;
CDS_11659	nucleus;
CDS_11668	integral to membrane;
CDS_11677	nucleus;
CDS_11682	integral to membrane;
CDS_11704	ribosome;
CDS_11705	nucleosome; nucleolus; chloroplast; vacuole; plasma membrane;
CDS_11706	nucleosome; nucleolus; chloroplast; vacuole; plasma membrane;
CDS_11715	6-phosphofructokinase complex;
CDS_11717	integral to membrane;
CDS_11719	intrinsic to endoplasmic reticulum membrane;
CDS_11727	COPII vesicle coat;
CDS_11747	nucleus;
CDS_11750	integral to membrane;
CDS_11751	integral to membrane;
CDS_11784	6-phosphofructokinase complex;
CDS_11799	ribosome;
CDS_11823	integral to membrane;
CDS_11824	integral to membrane; plasma membrane;
CDS_11825	nucleus;
CDS_11836	intracellular;
CDS_11837	membrane;
CDS_11843	membrane; chloroplast;
CDS_11854	integral to membrane;
CDS_11859	nucleus;
CDS_11866	integral to membrane;
CDS_11867	integral to membrane;
CDS_11875	cytoplasm;
CDS_11882	ribosome; mitochondrion;
CDS_11886	intracellular;
CDS_11909	intracellular;
CDS_11924	nucleus;
CDS_11926	nucleoplasm; cell wall; ribonucleoprotein complex;
CDS_11930	integral to membrane;
CDS_11933	intracellular;
CDS_11935	ubiquitin ligase complex;
CDS_11941	postsynaptic membrane; integral to membrane;
CDS_11944	chloroplast membrane;
CDS_11947	prefoldin complex;
CDS_11952	chloroplast;
CDS_11957	prefoldin complex;
CDS_11961	nuclear pore;
CDS_11964	ribosome;
CDS_11968	intracellular membrane-bounded organelle;
CDS_11971	nucleus;
CDS_11993	molybdopterin synthase complex;
CDS_12018	mitochondrial matrix;
CDS_12024	cytoplasm;
CDS_12026	endoplasmic reticulum;
CDS_12029	nucleus;
CDS_12032	integral to membrane;
CDS_12039	nucleus;
CDS_12043	integral to peroxisomal membrane;
CDS_12048	nucleus;
CDS_12050	membrane;
CDS_12054	integral to membrane;
CDS_12064	chromosome; membrane;
CDS_12065	nucleus;
CDS_12069	U4/U6 x U5 tri-snRNP complex;
CDS_12077	membrane;
[truncated: 3,968 more rows]

## Sheet:  molecular function
CDS IDs	GO molecular function
CDS_2	metal ion binding; carbohydrate binding;
CDS_3	protein kinase activity; ATP binding;
CDS_4	zinc ion binding;
CDS_5	nutrient reservoir activity; aspartic-type endopeptidase activity;
CDS_6	iron ion binding; lipoxygenase activity;
CDS_13	isomerase activity;
CDS_15	DNA binding;
CDS_16	nutrient reservoir activity;
CDS_21	potassium ion transmembrane transporter activity;
CDS_24	nutrient reservoir activity;
CDS_27	translation elongation factor activity;
CDS_31	structural constituent of ribosome;
CDS_32	electron carrier activity; protein disulfide oxidoreductase activity;
CDS_33	iron ion binding; inositol oxygenase activity;
CDS_34	ATP binding; protein serine/threonine kinase activity;
CDS_35	GTP binding;
CDS_36	heme binding; metal ion binding;
CDS_37	iron ion binding; lipoxygenase activity;
CDS_40	hydrolase activity;
CDS_41	structural constituent of ribosome;
CDS_42	zinc ion binding;
CDS_44	pyridoxal phosphate binding; glycogen phosphorylase activity;
CDS_47	oxidoreductase activity;
CDS_49	transferase activity, transferring hexosyl groups;
CDS_50	GTP binding;
CDS_52	kinase activity; ATP binding;
CDS_55	nutrient reservoir activity;
CDS_57	serine-type endopeptidase inhibitor activity; peptidase activity;
CDS_58	nutrient reservoir activity;
CDS_60	translation elongation factor activity; GTPase activity; GTP binding;
CDS_61	translation elongation factor activity; GTP binding; GTPase activity;
CDS_62	allantoinase activity; cobalt ion binding; zinc ion binding;
CDS_63	zinc ion binding;
CDS_71	ATP binding; protein serine/threonine kinase activity;
CDS_74	threonine-type endopeptidase activity;
CDS_75	threonine-type endopeptidase activity;
CDS_76	threonine-type endopeptidase activity;
CDS_78	amino acid binding; prephenate dehydratase activity;
CDS_79	transferase activity;
CDS_82	threonine-type endopeptidase activity;
CDS_86	N-acetyltransferase activity; iron-sulfur cluster binding;
CDS_89	oxidoreductase activity; nucleotide binding;
CDS_91	galactinol-raffinose galactosyltransferase activity;
CDS_92	galactinol-raffinose galactosyltransferase activity;
CDS_96	methylenetetrahydrofolate reductase (NADPH) activity;
CDS_97	acid-amino acid ligase activity;
CDS_98	acid-amino acid ligase activity;
CDS_103	heme binding; peroxidase activity;
CDS_104	oxidoreductase activity; nucleotide binding;
CDS_109	nucleotide binding; RNA binding;
CDS_110	hydrolase activity;
CDS_114	ATP binding;
CDS_119	zinc ion binding;
CDS_121	hydroxyacylglutathione hydrolase activity; zinc ion binding;
CDS_125	transferase activity, transferring glycosyl groups;
CDS_127	heme binding; oxidoreductase activity, acting on paired donors, with incorporation or reduction of molecular oxygen; monooxygenase activity; iron ion binding; electron carrier activity;
CDS_129	dihydrolipoyllysine-residue acetyltransferase activity;
CDS_130	dihydrolipoyllysine-residue acetyltransferase activity;
CDS_133	translation elongation factor activity;
CDS_136	metal ion binding;
CDS_137	ATPase activity, coupled to transmembrane movement of substances; ATP binding;
CDS_139	transferase activity, transferring hexosyl groups;
CDS_143	ATP binding; protein serine/threonine kinase activity;
CDS_144	3'-5'-exoribonuclease activity; RNA binding; polyribonucleotide nucleotidyltransferase activity;
CDS_148	sequence-specific DNA binding transcription factor activity; DNA binding;
CDS_149	serine O-acetyltransferase activity;
CDS_161	iron ion binding; lipoxygenase activity;
CDS_164	oxidoreductase activity, acting on paired donors, with incorporation or reduction of molecular oxygen, 2-oxoglutarate as one donor, and incorporation of one atom each of oxygen into both donors;
CDS_165	cysteine-type endopeptidase inhibitor activity;
CDS_166	aspartic-type endopeptidase activity;
CDS_167	ATP binding; unfolded protein binding;
CDS_169	ATP binding; protein serine/threonine kinase activity;
CDS_172	structural constituent of ribosome; rRNA binding; nucleotide binding;
CDS_174	GTPase activity; GTP binding;
CDS_178	binding;
CDS_182	inositol-3-phosphate synthase activity; nucleotide binding;
CDS_183	nutrient reservoir activity;
CDS_185	phosphopyruvate hydratase activity; magnesium ion binding;
CDS_187	intramolecular lyase activity;
CDS_188	zinc ion binding;
CDS_190	unfolded protein binding; calcium ion binding;
CDS_191	DNA binding;
CDS_195	urate oxidase activity;
CDS_199	DNA-directed RNA polymerase activity; nucleotide binding;
CDS_201	glutathione peroxidase activity;
CDS_202	mRNA binding;
CDS_203	RNA binding; ribonuclease T2 activity;
CDS_210	hydrolase activity, hydrolyzing O-glycosyl compounds;
CDS_212	oxidoreductase activity; nucleotide binding;
CDS_213	protein-arginine deiminase activity; agmatine deiminase activity;
CDS_216	heme binding; oxidoreductase activity, acting on paired donors, with incorporation or reduction of molecular oxygen; monooxygenase activity; iron ion binding; electron carrier activity;
CDS_218	nucleic acid binding; nucleotide binding;
CDS_219	structural molecule activity;
CDS_220	GTP binding;
CDS_221	RNA binding; DNA binding;
CDS_229	aminomethyltransferase activity;
CDS_230	ER retention sequence binding;
CDS_231	GTPase activity; GTP binding;
CDS_234	adenosylhomocysteinase activity; nucleotide binding;
CDS_242	transferase activity, transferring acyl groups other than amino-acyl groups;
CDS_250	glutamate-ammonia ligase activity; ATP binding;
CDS_251	enzyme inhibitor activity;
CDS_252	structural constituent of ribosome; RNA binding;
CDS_256	nucleoside-triphosphatase activity; ATP binding;
CDS_259	transferase activity;
CDS_261	iron ion binding; oxidoreductase activity, acting on single donors with incorporation of molecular oxygen, incorporation of two atoms of oxygen; oxidoreductase activity, acting on paired donors, with incorporation or reduction of molecular oxygen, 2-oxoglutarate as one donor, and incorporation of one atom each of oxygen into both donors;
CDS_262	CTP synthase activity;
CDS_263	CTP synthase activity;
CDS_268	tryptophan synthase activity; pyridoxal phosphate binding;
CDS_276	ATP binding;
CDS_277	zinc ion binding;
CDS_278	ubiquinol-cytochrome-c reductase activity;
CDS_279	malate synthase activity;
CDS_281	translation initiation factor activity; ribosomal large subunit binding; ribosome binding;
CDS_285	nucleic acid binding; ATP binding; ATP-dependent helicase activity;
CDS_287	malate synthase activity;
CDS_288	zinc ion binding;
CDS_291	nucleotide binding;
CDS_293	metal ion binding; metalloendopeptidase activity;
CDS_294	ATP binding; protein serine/threonine kinase activity;
CDS_296	protein dimerization activity;
CDS_301	P-P-bond-hydrolysis-driven protein transmembrane transporter activity;
CDS_302	RNA-directed DNA polymerase activity;
CDS_306	lipid binding; transporter activity;
CDS_309	allantoinase activity; cobalt ion binding; zinc ion binding;
CDS_312	RNA-directed DNA polymerase activity; RNA binding;
CDS_318	NAD binding; oxidoreductase activity, acting on the aldehyde or oxo group of donors, NAD or NADP as acceptor; NADP binding;
CDS_320	metal ion binding; heat shock protein binding; ATP binding; unfolded protein binding;
CDS_322	DNA binding; chromatin binding;
CDS_326	peptidyl-prolyl cis-trans isomerase activity;
CDS_332	metal ion binding; isocitrate hydro-lyase (cis-aconitate-forming) activity; citrate hydro-lyase (cis-aconitate-forming) activity; 4 iron, 4 sulfur cluster binding;
CDS_333	transporter activity;
CDS_334	transporter activity;
CDS_335	transporter activity;
CDS_336	transporter activity;
CDS_339	zinc ion binding; DNA binding;
CDS_342	intramolecular transferase activity;
CDS_344	protein-disulfide reductase activity;
CDS_345	nucleoside-triphosphatase activity; ATP binding;
CDS_351	DNA binding;
CDS_355	transporter activity;
CDS_357	cysteine-type peptidase activity;
CDS_359	sucrose synthase activity;
CDS_360	ATP binding; unfolded protein binding;
CDS_361	nucleotidyltransferase activity;
CDS_365	metalloexopeptidase activity; aminopeptidase activity;
CDS_370	nucleotide binding;
CDS_372	structural constituent of ribosome;
CDS_373	ATP binding;
CDS_375	sequence-specific DNA binding transcription factor activity; sequence-specific DNA binding;
CDS_377	calcium ion binding; calcium-dependent phospholipid binding;
CDS_379	zinc ion binding;
CDS_387	pyridoxal phosphate binding; glutamate decarboxylase activity;
CDS_388	ATP binding; protein serine/threonine kinase activity;
CDS_389	ATP binding;
CDS_390	peptidyl-prolyl cis-trans isomerase activity;
CDS_391	GTP binding; translation initiation factor activity;
CDS_394	metal ion binding; xylose isomerase activity;
CDS_399	transporter activity;
CDS_402	transcription corepressor activity;
CDS_404	metal ion binding;
CDS_406	zinc ion binding;
CDS_407	NADPH-hemoprotein reductase activity; iron ion binding; FMN binding;
CDS_410	structural constituent of ribosome;
CDS_412	nucleic acid binding; ATP binding; ATP-dependent helicase activity;
CDS_413	acid-amino acid ligase activity;
CDS_414	structural constituent of ribosome;
CDS_416	oxidoreductase activity; nucleotide binding;
CDS_421	structural constituent of ribosome;
CDS_423	P-P-bond-hydrolysis-driven protein transmembrane transporter activity; GTP binding;
CDS_426	cytochrome-c oxidase activity;
CDS_434	protein transporter activity;
CDS_435	cysteamine dioxygenase activity;
CDS_438	translation elongation factor activity;
CDS_441	transferase activity, transferring hexosyl groups;
CDS_442	zinc ion binding;
CDS_443	zinc ion binding;
CDS_445	RNA binding; nucleotide binding;
CDS_446	phosphorelay sensor kinase activity; ATP binding;
CDS_447	hydrolase activity, hydrolyzing O-glycosyl compounds; cation binding;
CDS_452	flavin adenine dinucleotide binding; electron carrier activity; iron ion binding; nitrate reductase (NADH) activity; molybdenum ion binding; heme binding; molybdopterin cofactor binding;
CDS_454	calcium ion binding; ATP binding; protein serine/threonine kinase activity;
CDS_462	peptidyl-prolyl cis-trans isomerase activity;
CDS_465	ATP binding; shikimate kinase activity;
CDS_468	identical protein binding; serine-type endopeptidase activity;
CDS_471	unfolded protein binding;
CDS_472	ATP binding; helicase activity; DNA binding;
CDS_473	ATP binding; protein serine/threonine kinase activity;
CDS_494	ATP binding; protein serine/threonine kinase activity;
CDS_495	oxidoreductase activity, acting on the aldehyde or oxo group of donors, NAD or NADP as acceptor;
CDS_498	ER retention sequence binding;
CDS_499	hydrolase activity, hydrolyzing O-glycosyl compounds; xyloglucan:xyloglucosyl transferase activity;
CDS_506	catalytic activity;
CDS_507	nucleic acid binding;
CDS_508	ATP binding; ATPase activity; transporter activity;
CDS_509	nucleic acid binding; nucleotide binding;
CDS_510	hydrolase activity, acting on ester bonds;
CDS_511	ATP binding; protein serine/threonine kinase activity;
CDS_512	2 iron, 2 sulfur cluster binding;
CDS_513	intramolecular transferase activity, phosphotransferases;
CDS_517	nucleic acid binding; ATP binding; ATP-dependent helicase activity;
CDS_520	oxidoreductase activity; nucleotide binding;
CDS_527	oxidoreductase activity, acting on a sulfur group of donors, disulfide as acceptor;
CDS_530	aspartic-type endopeptidase activity;
CDS_534	calcium ion binding;
CDS_539	RNA-directed DNA polymerase activity; RNA binding; aspartic-type endopeptidase activity; zinc ion binding;
CDS_543	zinc ion binding;
CDS_544	ATP binding; protein serine/threonine kinase activity;
CDS_546	transferase activity;
CDS_551	glucose-1-phosphate adenylyltransferase activity;
CDS_552	ATP binding; protein serine/threonine kinase activity;
CDS_556	aspartic-type endopeptidase activity;
CDS_560	adenosylmethionine decarboxylase activity;
CDS_561	RNA binding;
CDS_563	DNA-directed DNA polymerase activity; DNA binding;
CDS_564	ARF GTPase activator activity; zinc ion binding;
CDS_565	ATP binding; unfolded protein binding;
CDS_571	binding;
CDS_573	transporter activity;
CDS_579	acid-amino acid ligase activity;
CDS_581	structural constituent of ribosome;
CDS_586	pyruvate dehydrogenase (acetyl-transferring) activity;
CDS_587	structural constituent of ribosome; RNA binding;
CDS_588	DNA binding; NAD+ ADP-ribosyltransferase activity;
CDS_590	damaged DNA binding;
CDS_591	damaged DNA binding;
CDS_595	cysteine-type endopeptidase activity;
CDS_596	DNA binding;
CDS_597	zinc ion binding; nucleic acid binding; nucleotide binding;
CDS_599	fatty-acyl-CoA binding;
CDS_600	nucleotide binding; coenzyme binding; catalytic activity;
CDS_605	transferase activity, transferring glycosyl groups;
CDS_607	DNA binding;
CDS_611	hydrolase activity, hydrolyzing O-glycosyl compounds;
CDS_612	serine-type endopeptidase activity;
CDS_619	solute:hydrogen antiporter activity; nucleotide binding;
CDS_620	receptor binding; cytokine receptor activity;
CDS_621	DNA binding;
CDS_623	triose-phosphate isomerase activity;
CDS_624	nucleotide binding;
CDS_631	hydrolase activity, acting on ester bonds; nucleic acid binding;
CDS_632	metal ion binding; protein serine/threonine phosphatase activity;
CDS_633	ATP binding; protein serine/threonine kinase activity;
CDS_634	translation elongation factor activity; ribosome binding;
CDS_636	transferase activity;
CDS_638	oxidoreductase activity; nucleotide binding; zinc ion binding;
CDS_642	structural constituent of ribosome;
CDS_645	catalytic activity;
CDS_650	nucleotide binding;
CDS_652	cation-transporting ATPase activity; metal ion binding; ATP binding;
CDS_655	catalytic activity;
CDS_656	translation initiation factor activity;
CDS_659	choline kinase activity;
CDS_664	structural constituent of ribosome;
CDS_666	oxidoreductase activity; nucleotide binding; zinc ion binding;
CDS_670	DNA binding; protein dimerization activity;
CDS_671	ATP binding; tRNA binding;
CDS_674	hydrolase activity; isopentenyl-diphosphate delta-isomerase activity;
CDS_675	transporter activity;
CDS_678	glutamate-ammonia ligase activity; ATP binding;
CDS_679	ATP binding;
CDS_680	serine-type carboxypeptidase activity;
CDS_684	iron ion binding; iron-sulfur cluster binding;
CDS_691	metal ion binding; 2 iron, 2 sulfur cluster binding; chlorophyllide a oxygenase [overall] activity;
CDS_693	aspartic-type endopeptidase activity;
CDS_694	GTP binding;
CDS_695	oxidoreductase activity; nucleotide binding;
CDS_697	DNA binding; protein heterodimerization activity;
CDS_698	DNA binding; protein heterodimerization activity;
CDS_707	DNA binding;
CDS_708	nucleic acid binding; nucleotide binding;
CDS_709	lipid binding;
CDS_717	oxidoreductase activity; nucleotide binding; zinc ion binding;
CDS_718	phospholipid binding;
CDS_719	phospholipid binding;
CDS_720	coenzyme binding; nucleotide binding; UDP-glucose 4-epimerase activity;
CDS_721	hydrogen ion transmembrane transporter activity;
CDS_729	zinc ion binding; chromatin binding; DNA binding;
CDS_732	structural constituent of ribosome;
CDS_733	structural constituent of ribosome;
CDS_739	tryptophan synthase activity;
CDS_740	nucleic acid binding; protein methyltransferase activity;
CDS_742	ATP binding; galactokinase activity;
CDS_745	hydrolase activity, acting on glycosyl bonds;
CDS_756	catalytic activity;
CDS_757	oxidoreductase activity, acting on paired donors, with incorporation or reduction of molecular oxygen, 2-oxoglutarate as one donor, and incorporation of one atom each of oxygen into both donors;
CDS_758	oxidoreductase activity, acting on paired donors, with incorporation or reduction of molecular oxygen, 2-oxoglutarate as one donor, and incorporation of one atom each of oxygen into both donors;
CDS_759	metallopeptidase activity; zinc ion binding;
CDS_760	structural constituent of ribosome;
CDS_761	translation initiation factor activity;
CDS_764	phosphatidate cytidylyltransferase activity;
CDS_765	calcium ion binding;
CDS_768	zinc ion binding;
CDS_769	aspartic-type endopeptidase activity;
CDS_774	protein tyrosine/serine/threonine phosphatase activity;
CDS_776	zeaxanthin epoxidase activity; zeaxanthin epoxidase [overall] activity; antheraxanthin epoxidase activity;
CDS_777	SUMO ligase activity;
CDS_778	sequence-specific DNA binding transcription factor activity; sequence-specific DNA binding;
CDS_779	ferric iron binding; ferroxidase activity;
CDS_781	ATP binding;
CDS_784	transporter activity;
CDS_785	protein dimerization activity;
CDS_789	zinc ion binding;
CDS_792	protein kinase activity; ATP binding;
CDS_795	manganese ion binding; metalloexopeptidase activity; aminopeptidase activity;
CDS_796	peptidase activity;
CDS_797	O-methyltransferase activity; protein dimerization activity;
CDS_800	nucleic acid binding; nucleotide binding;
CDS_801	hydrogen-translocating pyrophosphatase activity; inorganic diphosphatase activity;
CDS_802	carbohydrate binding;
CDS_803	transporter activity;
CDS_804	GTP binding;
CDS_806	sequence-specific DNA binding transcription factor activity; DNA binding;
CDS_811	electron carrier activity; protein disulfide oxidoreductase activity;
CDS_814	structural constituent of ribosome; RNA binding;
CDS_817	peptide deformylase activity; iron ion binding;
CDS_826	NAD binding; UDP-glucose 6-dehydrogenase activity;
CDS_833	electron carrier activity; protein disulfide oxidoreductase activity;
CDS_835	binding;
CDS_837	hydrogen ion transmembrane transporter activity;
CDS_838	cysteine-type endopeptidase inhibitor activity;
CDS_840	ATP binding; protein serine/threonine kinase activity;
CDS_841	nucleotide binding; coenzyme binding; catalytic activity;
CDS_844	translation initiation factor activity;
CDS_846	ER retention sequence binding;
CDS_847	zinc ion binding; nucleic acid binding;
CDS_849	ubiquitin-protein ligase activity; zinc ion binding;
CDS_851	ATP binding;
CDS_853	protein transporter activity;
CDS_855	transferase activity, transferring glycosyl groups;
CDS_856	ATP binding;
CDS_857	NAD binding; isocitrate dehydrogenase (NADP+) activity; magnesium ion binding;
CDS_858	sequence-specific DNA binding transcription factor activity; sequence-specific DNA binding;
CDS_860	acid-amino acid ligase activity;
CDS_865	structural constituent of ribosome; nucleotide binding;
CDS_866	transferase activity, transferring glycosyl groups;
CDS_867	RNA binding; DNA binding;
CDS_868	calcium-transporting ATPase activity; calmodulin binding; metal ion binding; ATP binding;
CDS_872	structural constituent of ribosome;
CDS_878	mannose-1-phosphate guanylyltransferase (GDP) activity;
CDS_879	mannose-1-phosphate guanylyltransferase (GDP) activity;
CDS_880	GTP binding;
CDS_881	nucleoside-triphosphatase activity; ATP binding;
CDS_882	nucleoside-triphosphatase activity; ATP binding;
CDS_883	iron ion binding; lipoxygenase activity;
CDS_886	4 iron, 4 sulfur cluster binding; electron carrier activity; oxidoreductase activity, acting on NAD(P)H;
CDS_889	ATP binding; unfolded protein binding;
CDS_890	metal ion binding; heat shock protein binding; ATP binding; unfolded protein binding;
CDS_895	Rab geranylgeranyltransferase activity;
CDS_896	phosphotransferase activity, alcohol group as acceptor;
CDS_898	zinc ion binding;
CDS_901	sequence-specific DNA binding;
CDS_903	structural constituent of ribosome;
CDS_905	carbohydrate binding; hydrolase activity, hydrolyzing O-glycosyl compounds;
CDS_908	zinc ion binding;
CDS_910	4 iron, 4 sulfur cluster binding;
CDS_912	catalytic activity;
CDS_919	ribulose-phosphate 3-epimerase activity; metal ion binding;
CDS_922	structural constituent of ribosome;
CDS_926	structural constituent of ribosome; RNA binding;
CDS_927	structural constituent of ribosome; RNA binding;
CDS_929	ATP-dependent DNA helicase activity; DNA binding; ATP binding;
CDS_933	zinc ion binding;
CDS_937	binding;
CDS_943	structural constituent of ribosome;
CDS_944	structural constituent of ribosome;
CDS_947	DNA binding;
CDS_948	pyridoxal phosphate binding; glycogen phosphorylase activity;
CDS_955	structural constituent of ribosome;
CDS_958	metal ion binding;
CDS_959	4-(cytidine 5'-diphospho)-2-C-methyl-D-erythritol kinase activity; ATP binding;
CDS_960	transferase activity, transferring glycosyl groups;
CDS_964	structural constituent of ribosome;
CDS_965	N-methyltransferase activity;
CDS_968	ATP binding; protein serine/threonine kinase activity;
CDS_970	zinc ion binding;
CDS_973	GTPase activity; GTP binding;
CDS_974	GTP binding;
CDS_975	GTP binding;
CDS_976	transferase activity, transferring glycosyl groups;
CDS_980	peroxiredoxin activity; peroxidase activity;
CDS_981	calcium ion binding;
CDS_984	transferase activity, transferring hexosyl groups;
CDS_985	molybdenum ion binding; pyridoxal phosphate binding; catalytic activity;
CDS_988	electron carrier activity; protein disulfide oxidoreductase activity;
CDS_990	electron carrier activity; protein disulfide oxidoreductase activity;
CDS_998	zinc ion binding;
CDS_999	GTP binding;
CDS_1007	hydrolase activity;
CDS_1009	nucleic acid binding;
CDS_1017	nucleic acid binding; nucleotide binding;
CDS_1018	oxidoreductase activity, acting on the CH-CH group of donors, NAD or NADP as acceptor;
CDS_1025	electron carrier activity; protein disulfide oxidoreductase activity;
CDS_1028	SNAP receptor activity;
CDS_1029	oxidoreductase activity, acting on NAD(P)H;
CDS_1031	transferase activity;
CDS_1032	GTPase activity; GTP binding;
CDS_1033	ATP:ADP antiporter activity; ATP binding;
CDS_1037	nucleic acid binding; nucleotide binding;
CDS_1044	structural constituent of ribosome;
CDS_1046	metal ion binding; 4 iron, 4 sulfur cluster binding; quinone binding; NADH dehydrogenase (ubiquinone) activity;
CDS_1052	RNA binding;
CDS_1053	peptide-methionine (S)-S-oxide reductase activity;
CDS_1054	electron carrier activity; protein disulfide oxidoreductase activity;
CDS_1055	ubiquinol-cytochrome-c reductase activity;
CDS_1058	heme binding; peroxidase activity;
CDS_1061	ATP binding;
CDS_1066	nucleic acid binding; nucleotide binding;
CDS_1070	phosphotransferase activity, alcohol group as acceptor; kinase activity; ATP binding;
CDS_1072	pyridoxal phosphate binding; transaminase activity;
CDS_1077	nucleotide binding; coenzyme binding; catalytic activity;
CDS_1080	calcium ion binding;
CDS_1082	dGTPase activity; phosphoric diester hydrolase activity; magnesium ion binding;
CDS_1083	translation initiation factor activity; ribosome binding;
CDS_1084	threonine-type endopeptidase activity;
CDS_1090	nucleic acid binding; nucleotide binding;
CDS_1093	nucleotide binding; L-malate dehydrogenase activity;
CDS_1095	GTPase activity; structural constituent of cytoskeleton; GTP binding;
CDS_1097	cysteine-type peptidase activity;
CDS_1098	nucleic acid binding; zinc ion binding;
CDS_1100	zinc ion binding;
CDS_1104	structural constituent of ribosome;
CDS_1105	nucleic acid binding; nucleotide binding;
CDS_1107	transporter activity;
CDS_1117	DNA binding; chromatin binding;
CDS_1118	zinc ion binding;
CDS_1120	structural constituent of ribosome;
CDS_1125	nucleic acid binding; nucleotide binding;
CDS_1126	structural constituent of ribosome;
CDS_1127	NAD binding; zinc ion binding; histidinol dehydrogenase activity;
CDS_1128	sequence-specific DNA binding transcription factor activity; sequence-specific DNA binding;
CDS_1133	structural constituent of ribosome;
CDS_1134	structural constituent of ribosome;
CDS_1138	DNA-directed RNA polymerase activity; DNA binding;
CDS_1139	ATP binding; protein serine/threonine kinase activity;
CDS_1142	metal ion binding; metalloendopeptidase activity;
CDS_1146	hydrolase activity, hydrolyzing O-glycosyl compounds;
CDS_1149	sucrose-phosphate phosphatase activity; magnesium ion binding;
CDS_1150	oxidoreductase activity;
CDS_1151	N-acetyltransferase activity;
CDS_1154	ubiquitin-protein ligase activity;
CDS_1155	metal ion binding; heme binding; catalase activity;
CDS_1156	metal ion binding; heme binding; catalase activity;
CDS_1160	nucleic acid binding; nucleotide binding;
CDS_1163	methionine adenosyltransferase activity; metal ion binding; ATP binding;
CDS_1164	methionine adenosyltransferase activity; metal ion binding; ATP binding;
CDS_1165	methionine adenosyltransferase activity; metal ion binding; ATP binding;
CDS_1166	structural constituent of ribosome;
CDS_1174	ATP binding;
CDS_1179	structural constituent of ribosome;
CDS_1180	ATP binding; protein serine/threonine kinase activity;
CDS_1181	threonine-type endopeptidase activity;
CDS_1182	sequence-specific DNA binding transcription factor activity; sequence-specific DNA binding;
CDS_1184	nucleic acid binding; nucleotide binding;
CDS_1190	oxidoreductase activity;
CDS_1191	zinc ion binding; nucleic acid binding;
CDS_1198	binding; catalytic activity;
CDS_1200	1-phosphatidylinositol-4-phosphate 5-kinase activity; ATP binding;
CDS_1201	protein kinase activity; ATP binding;
CDS_1202	structural constituent of ribosome;
CDS_1205	structural constituent of ribosome;
CDS_1206	structural constituent of ribosome;
CDS_1208	zinc ion binding;
CDS_1209	identical protein binding; serine-type endopeptidase activity;
CDS_1211	chalcone isomerase activity;
CDS_1212	DNA binding;
CDS_1214	helicase activity; DNA binding; ATP binding; zinc ion binding;
CDS_1215	zinc ion binding;
CDS_1220	DNA binding;
CDS_1223	nucleic acid binding; ATP binding; ATP-dependent helicase activity;
CDS_1227	oxidoreductase activity, acting on the aldehyde or oxo group of donors, NAD or NADP as acceptor;
CDS_1232	transferase activity, transferring phosphorus-containing groups;
CDS_1235	iron ion binding; iron-sulfur cluster binding;
CDS_1238	nucleic acid binding; nucleotide binding;
CDS_1240	catalytic activity;
CDS_1256	catalytic activity;
CDS_1257	metal ion binding; lyase activity;
CDS_1265	ATP binding; protein serine/threonine kinase activity;
CDS_1266	ATP binding; protein serine/threonine kinase activity;
CDS_1267	ATP binding; protein serine/threonine kinase activity;
CDS_1268	metal ion binding;
CDS_1269	triglyceride lipase activity; carboxylesterase activity;
CDS_1276	acetylglucosaminyltransferase activity;
CDS_1280	ATP-dependent helicase activity; RNA binding; ATP binding; zinc ion binding;
CDS_1281	enzyme regulator activity;
CDS_1282	zinc ion binding;
CDS_1284	transferase activity;
CDS_1285	structural constituent of ribosome;
CDS_1286	structural constituent of ribosome;
CDS_1289	structural constituent of ribosome;
CDS_1294	nucleoside-triphosphatase activity; ATP binding;
CDS_1296	hydrogen ion transmembrane transporter activity;
CDS_1297	phosphorelay response regulator activity; ATP binding; phosphorelay sensor kinase activity;
CDS_1300	peptidyl-prolyl cis-trans isomerase activity;
CDS_1302	ATPase activity, coupled to transmembrane movement of substances; ATP binding;
CDS_1314	metal ion transmembrane transporter activity;
CDS_1315	catalytic activity;
CDS_1317	oxidoreductase activity; FMN binding;
CDS_1321	zinc ion binding; nucleic acid binding;
CDS_1328	flavin adenine dinucleotide binding; oxidoreductase activity, acting on the CH-CH group of donors;
CDS_1330	zinc ion binding;
CDS_1331	transferase activity;
CDS_1337	Rab GDP-dissociation inhibitor activity;
CDS_1340	magnesium ion transmembrane transporter activity;
CDS_1343	catalytic activity;
CDS_1346	zinc ion binding; chromatin binding; DNA binding;
CDS_1347	endopeptidase inhibitor activity; peptidase activity;
CDS_1349	acylphosphatase activity;
CDS_1350	metal ion binding;
CDS_1351	actin binding;
CDS_1355	glucose-1-phosphate adenylyltransferase activity;
CDS_1357	threonine-type endopeptidase activity;
CDS_1358	3-oxoacyl-[acyl-carrier-protein] reductase (NADPH) activity; nucleotide binding;
CDS_1360	glutamate-cysteine ligase activity;
CDS_1366	ketol-acid reductoisomerase activity; metal ion binding; coenzyme binding; nucleotide binding;
CDS_1371	oxidoreductase activity, acting on paired donors, with oxidation of a pair of donors resulting in the reduction of molecular oxygen to two molecules of water;
CDS_1372	proline dehydrogenase activity;
CDS_1373	proline dehydrogenase activity;
CDS_1374	coenzyme binding; nucleotide binding; UDP-glucose 4-epimerase activity;
CDS_1375	nucleic acid binding; nucleotide binding;
CDS_1377	3-methyl-2-oxobutanoate hydroxymethyltransferase activity; methyltransferase activity;
CDS_1381	DNA binding; chromatin binding;
CDS_1382	chromatin binding;
CDS_1384	protein tyrosine kinase activity; ATP binding; protein serine/threonine kinase activity;
CDS_1385	RNA binding;
CDS_1389	voltage-gated anion channel activity;
CDS_1391	chaperone binding; ATPase activator activity;
CDS_1399	calcium ion binding; ATP binding; protein serine/threonine kinase activity;
CDS_1400	ATP binding; damaged DNA binding; mismatched DNA binding;
CDS_1402	GTP binding;
CDS_1403	ATP binding;
CDS_1407	structural constituent of ribosome;
CDS_1409	oxidoreductase activity; nucleotide binding; zinc ion binding;
CDS_1411	zinc ion binding; DNA binding; ATP binding; helicase activity; iron ion binding;
CDS_1414	DNA binding;
CDS_1420	1-acylglycerol-3-phosphate O-acyltransferase activity;
CDS_1421	flavin adenine dinucleotide binding; glutamate synthase (NADH) activity; iron-sulfur cluster binding; iron ion binding; FMN binding;
CDS_1423	calcium ion binding;
CDS_1424	omega peptidase activity;
CDS_1425	nucleic acid binding; nucleotide binding;
CDS_1427	structural constituent of ribosome;
CDS_1428	aspartic-type endopeptidase activity;
CDS_1429	electron transporter, transferring electrons within the cyclic electron transport pathway of photosynthesis activity;
CDS_1430	ATP binding; protein serine/threonine kinase activity;
CDS_1434	nucleic acid binding; nucleotide binding;
CDS_1442	RNA binding; methyltransferase activity;
CDS_1443	RNA binding; methyltransferase activity;
CDS_1444	nucleoside-triphosphatase activity; ATP binding;
CDS_1446	protein dimerization activity;
CDS_1450	hydrogen ion transmembrane transporter activity;
CDS_1452	nucleotide binding;
CDS_1459	oxidoreductase activity; iron ion binding;
CDS_1460	nucleic acid binding; nucleotide binding;
CDS_1461	nucleotide binding; coenzyme binding; catalytic activity;
CDS_1465	sequence-specific DNA binding transcription factor activity; transcription regulatory region sequence-specific DNA binding;
CDS_1468	DNA binding; protein heterodimerization activity;
CDS_1476	metal ion binding;
CDS_1477	transferase activity, transferring acyl groups other than amino-acyl groups;
CDS_1480	zinc ion binding;
CDS_1482	copper ion binding; electron carrier activity;
CDS_1483	glutathione transferase activity;
CDS_1485	heme binding; metal ion binding; peroxidase activity;
CDS_1487	protein kinase activity; ATP binding;
CDS_1490	DNA-directed RNA polymerase activity; DNA binding;
CDS_1491	DNA binding; chromatin binding;
CDS_1497	peptide-methionine (R)-S-oxide reductase activity;
CDS_1501	chitinase activity;
CDS_1505	heme binding;
CDS_1511	GTP binding;
CDS_1512	GTP binding;
CDS_1513	methyltransferase activity;
CDS_1516	structural molecule activity;
CDS_1518	voltage-gated anion channel activity;
CDS_1520	zinc ion binding;
CDS_1522	zinc ion binding; nucleic acid binding;
CDS_1523	GTP binding;
CDS_1524	transferase activity;
CDS_1527	substrate-specific transmembrane transporter activity;
CDS_1528	structural constituent of ribosome;
CDS_1531	metal ion binding; cation-transporting ATPase activity; ATP binding;
CDS_1537	starch synthase activity;
CDS_1538	starch synthase activity;
CDS_1539	threonine-type endopeptidase activity;
CDS_1540	threonine-type endopeptidase activity;
CDS_1545	ATP binding; protein serine/threonine kinase activity;
CDS_1546	structural constituent of ribosome;
CDS_1547	metalloendopeptidase activity; ATP binding; nucleoside-triphosphatase activity;
CDS_1551	nucleotide binding; coenzyme binding; catalytic activity;
CDS_1552	oxidoreductase activity; iron ion binding;
CDS_1553	ureidoglycolate hydrolase activity;
CDS_1563	succinate-CoA ligase (ADP-forming) activity; nucleotide binding; lyase activity; ATP citrate synthase activity;
CDS_1566	NAD binding; isocitrate dehydrogenase (NAD+) activity; magnesium ion binding;
CDS_1567	structural constituent of ribosome; RNA binding;
CDS_1571	zinc ion binding;
CDS_1573	structural constituent of ribosome; RNA binding;
CDS_1575	metal ion binding; protein serine/threonine phosphatase activity;
CDS_1581	ATP binding;
CDS_1583	zinc ion binding;
CDS_1585	nucleotide binding;
CDS_1586	GTP binding;
CDS_1587	GTP binding;
CDS_1590	peptide-methionine (R)-S-oxide reductase activity;
CDS_1594	structural constituent of ribosome;
CDS_1595	structural constituent of ribosome;
CDS_1597	calcium ion binding; GTPase activity; GTP binding;
CDS_1606	endodeoxyribonuclease activity, producing 5'-phosphomonoesters;
CDS_1608	ATP binding; protein serine/threonine kinase activity;
CDS_1609	nucleic acid binding;
CDS_1610	diacylglycerol kinase activity;
CDS_1611	acid-amino acid ligase activity;
CDS_1612	ATP binding; ATPase activity;
CDS_1613	calcium ion binding;
CDS_1618	nucleic acid binding; nucleotide binding;
CDS_1629	nucleotide binding; coenzyme binding; catalytic activity;
CDS_1633	nucleic acid binding; nucleotide binding;
CDS_1641	zinc ion binding; nucleotide binding; RNA binding;
CDS_1642	GTP binding;
CDS_1643	metal ion binding;
CDS_1644	zinc ion binding; nucleic acid binding;
CDS_1650	P-P-bond-hydrolysis-driven protein transmembrane transporter activity;
CDS_1656	oxidoreductase activity, acting on the CH-CH group of donors;
CDS_1657	calcium ion binding;
CDS_1660	arginine decarboxylase activity;
CDS_1663	nucleic acid binding; ATP binding; ATP-dependent helicase activity;
CDS_1664	zinc ion binding; methyltransferase activity;
CDS_1665	structural constituent of ribosome;
CDS_1669	zinc ion binding;
CDS_1670	structural constituent of ribosome;
CDS_1674	hydrolase activity, hydrolyzing O-glycosyl compounds;
CDS_1676	GTP binding;
CDS_1677	hydrogen ion transmembrane transporter activity;
CDS_1678	ATP binding; protein homodimerization activity; photoreceptor activity; phosphorelay sensor kinase activity;
CDS_1679	oxidoreductase activity; FMN binding;
CDS_1680	threonine-tRNA ligase activity; ATP binding;
CDS_1682	antiporter activity; drug transmembrane transporter activity;
CDS_1685	metal ion binding;
CDS_1686	ATP binding; unfolded protein binding;
CDS_1687	GTP binding;
CDS_1688	zinc ion binding;
CDS_1693	fructose-bisphosphate aldolase activity;
CDS_1694	zinc ion binding;
CDS_1698	hydrolase activity, acting on carbon-nitrogen (but not peptide) bonds, in linear amides;
CDS_1699	hydrolase activity;
CDS_1700	NAPE-specific phospholipase D activity; calcium ion binding; phospholipase D activity;
CDS_1706	phosphorelay response regulator activity; ATP binding; phosphorelay sensor kinase activity;
CDS_1707	metal ion binding; sulfite reductase (ferredoxin) activity; DNA binding; 4 iron, 4 sulfur cluster binding; heme binding;
CDS_1711	DNA binding; chromatin binding;
CDS_1716	structural constituent of ribosome;
CDS_1718	transcription cofactor activity; zinc ion binding; histone acetyltransferase activity;
CDS_1720	structural constituent of ribosome; nucleotide binding;
CDS_1721	ATP binding; protein serine/threonine kinase activity;
CDS_1722	unfolded protein binding; calcium ion binding;
CDS_1723	structural constituent of ribosome;
CDS_1724	protein dimerization activity;
CDS_1725	cation-transporting ATPase activity; metal ion binding; ATP binding;
CDS_1727	electron carrier activity; iron ion binding; heme binding;
CDS_1728	hydrolase activity; manganese ion binding; RNA binding;
CDS_1733	aspartic-type endopeptidase activity;
CDS_1735	protein kinase C binding; histone deacetylase binding; drug binding; protein C-terminus binding; ubiquitin binding; protein heterodimerization activity; magnesium ion binding; protein homodimerization activity; chromatin binding; DNA topoisomerase type II (ATP-hydrolyzing) activity; DNA binding, bending;
CDS_1736	sequence-specific DNA binding; cyanate hydratase activity;
CDS_1738	nucleic acid binding; nucleotide binding;
CDS_1739	threonine-type endopeptidase activity;
CDS_1747	structural constituent of ribosome;
CDS_1751	NAD binding; UDP-glucose 6-dehydrogenase activity;
CDS_1752	nucleic acid binding; lysine-tRNA ligase activity; ATP binding;
CDS_1753	pseudouridine synthase activity; RNA binding;
CDS_1754	catalytic activity;
CDS_1756	metal ion binding; heat shock protein binding; ATP binding; unfolded protein binding;
CDS_1757	NAD binding; metal ion binding; malate dehydrogenase (oxaloacetate-decarboxylating) activity;
CDS_1758	atrazine chlorohydrolase activity; hydrolase activity, acting on carbon-nitrogen (but not peptide) bonds;
CDS_1759	hydrolase activity;
CDS_1768	cysteine-type peptidase activity; ubiquitin thiolesterase activity;
CDS_1777	phosphatidylinositol binding;
CDS_1778	RNA-directed DNA polymerase activity; RNA binding; aspartic-type endopeptidase activity; zinc ion binding;
CDS_1782	DNA binding; serine-type endopeptidase activity;
CDS_1784	copper ion binding; cytochrome-c oxidase activity;
CDS_1787	lyase activity; pyridoxal phosphate binding;
CDS_1790	magnesium ion transmembrane transporter activity;
CDS_1791	pyruvate kinase activity; potassium ion binding; ATP binding; magnesium ion binding;
CDS_1792	structural constituent of ribosome;
CDS_1793	phosphoprotein phosphatase activity;
CDS_1795	GTPase activity; GTP binding;
CDS_1797	iron-sulfur cluster binding;
CDS_1804	methyltransferase activity;
CDS_1805	glycylpeptide N-tetradecanoyltransferase activity;
CDS_1806	zinc ion binding; nucleic acid binding; nucleotide binding;
CDS_1809	ATP binding; 2-alkenal reductase [NAD(P)] activity;
CDS_1811	metal ion binding;
CDS_1817	actin binding;
CDS_1818	sequence-specific DNA binding transcription factor activity; DNA binding;
CDS_1819	secondary active sulfate transmembrane transporter activity;
CDS_1827	protein heterodimerization activity;
CDS_1833	translation elongation factor activity;
CDS_1838	metal ion binding; ATP binding; cation-transporting ATPase activity;
CDS_1840	metal ion binding;
CDS_1841	DNA photolyase activity;
CDS_1842	structural constituent of ribosome;
CDS_1843	hydrolase activity, hydrolyzing O-glycosyl compounds;
CDS_1845	translation initiation factor activity; nucleotide binding;
CDS_1848	phosphoprotein phosphatase activity;
CDS_1849	metal ion transmembrane transporter activity;
CDS_1850	oxidoreductase activity, acting on the aldehyde or oxo group of donors, NAD or NADP as acceptor;
CDS_1853	dolichyl-diphosphooligosaccharide-protein glycotransferase activity;
CDS_1854	nucleoside-triphosphatase activity; ATP binding;
CDS_1856	hydrolase activity, hydrolyzing O-glycosyl compounds; cation binding;
CDS_1860	electron carrier activity; protein disulfide oxidoreductase activity;
CDS_1867	oxidoreductase activity, acting on the aldehyde or oxo group of donors, disulfide as acceptor;
CDS_1872	zinc ion binding;
CDS_1873	ATP binding; ATPase activity;
CDS_1874	translation initiation factor activity; zinc ion binding; nucleotide binding;
CDS_1875	translation initiation factor activity; zinc ion binding; nucleotide binding;
CDS_1878	flavin adenine dinucleotide binding; oxidoreductase activity; calcium ion binding;
CDS_1890	protein kinase binding;
CDS_1891	electron carrier activity; cytochrome-c oxidase activity;
CDS_1894	pyridoxal phosphate binding; L-threonine ammonia-lyase activity;
CDS_1895	zinc ion binding;
CDS_1901	aspartic-type endopeptidase activity;
CDS_1902	hydrolase activity; carbohydrate binding;
CDS_1903	zinc ion binding;
CDS_1904	ubiquitin protein ligase binding;
CDS_1907	nucleic acid binding;
CDS_1910	hydrolase activity;
CDS_1914	calcium ion binding;
CDS_1915	carbohydrate transmembrane transporter activity;
CDS_1916	nucleic acid binding; nucleotide binding;
CDS_1918	sequence-specific DNA binding transcription factor activity; sequence-specific DNA binding;
CDS_1919	translation elongation factor activity;
CDS_1921	manganese ion binding; metalloexopeptidase activity; aminopeptidase activity;
CDS_1926	catalytic activity;
CDS_1927	hydrolase activity, acting on carbon-nitrogen (but not peptide) bonds;
CDS_1930	cellulase activity;
CDS_1933	ATP-dependent helicase activity; RNA binding; ATP binding;
CDS_1935	protein phosphatase type 2A regulator activity;
CDS_1936	nucleic acid binding; ATP binding; ATP-dependent helicase activity;
CDS_1939	transporter activity;
CDS_1940	nucleic acid binding; transferase activity;
CDS_1942	pyridoxal phosphate binding; carboxy-lyase activity;
CDS_1943	methylmalonate-semialdehyde dehydrogenase (acylating) activity;
CDS_1945	ATP binding; protein serine/threonine kinase activity;
CDS_1948	nucleoside-triphosphatase activity; ATP binding;
CDS_1951	oxidoreductase activity;
CDS_1952	structural constituent of ribosome; RNA binding;
CDS_1953	structural constituent of ribosome;
CDS_1957	carbohydrate binding; alpha-mannosidase activity; zinc ion binding;
CDS_1959	protein tyrosine kinase activity; ATP binding;
CDS_1960	protein tyrosine kinase activity; ATP binding;
CDS_1963	structural constituent of ribosome; nucleotide binding;
CDS_1969	ATP binding; nucleoside-triphosphatase activity;
CDS_1970	metal ion binding;
CDS_1972	pyridoxal phosphate binding; L-aspartate:2-oxoglutarate aminotransferase activity; L-phenylalanine:2-oxoglutarate aminotransferase activity;
CDS_1974	oxidoreductase activity; nucleotide binding;
CDS_1977	transferase activity, transferring acyl groups;
CDS_1978	6-phosphofructokinase activity; diphosphate-fructose-6-phosphate 1-phosphotransferase activity; ATP binding;
CDS_1980	3-deoxy-7-phosphoheptulonate synthase activity;
CDS_1982	prephenate dehydrogenase activity; prephenate dehydrogenase (NADP+) activity; nucleotide binding;
CDS_1983	prephenate dehydrogenase activity; prephenate dehydrogenase (NADP+) activity; nucleotide binding;
CDS_1985	structural constituent of ribosome;
CDS_1986	structural constituent of ribosome;
CDS_1990	nucleic acid binding; nucleotide binding;
CDS_1997	ATP binding;
CDS_2000	metal ion binding; superoxide dismutase activity;
CDS_2001	binding;
CDS_2010	structural constituent of ribosome;
CDS_2011	ATP binding; protein serine/threonine kinase activity;
CDS_2013	structural constituent of ribosome;
CDS_2014	1-phosphatidylinositol binding; clathrin binding;
CDS_2015	structural constituent of ribosome;
CDS_2016	protein dimerization activity;
CDS_2017	hydrolase activity;
CDS_2018	structural molecule activity;
CDS_2021	proton-transporting ATP synthase activity, rotational mechanism; ATP binding;
CDS_2026	aspartic-type endopeptidase activity;
CDS_2027	protein disulfide oxidoreductase activity;
CDS_2028	nucleotide binding; coenzyme binding; catalytic activity;
CDS_2029	structural constituent of ribosome;
CDS_2030	zinc ion binding; nucleic acid binding;
CDS_2032	nucleoside transmembrane transporter activity;
CDS_2037	GTP binding;
CDS_2039	zinc ion binding;
CDS_2040	heme binding; oxidoreductase activity, acting on paired donors, with incorporation or reduction of molecular oxygen; monooxygenase activity; iron ion binding; electron carrier activity;
CDS_2043	DNA binding; protein heterodimerization activity;
CDS_2056	chitinase activity; chitin binding;
CDS_2057	zinc ion binding; DNA binding;
CDS_2067	glutamate 5-kinase activity; glutamate-5-semialdehyde dehydrogenase activity;
CDS_2069	nucleotide binding; coenzyme binding; catalytic activity;
CDS_2070	zinc ion binding; nucleic acid binding;
CDS_2073	aspartic-type endopeptidase activity;
CDS_2074	metal ion binding; 2 iron, 2 sulfur cluster binding; chlorophyllide a oxygenase [overall] activity;
CDS_2078	serine-type peptidase activity;
CDS_2084	ligase activity; small protein activating enzyme activity; ATP binding;
CDS_2088	ATP binding; protein serine/threonine kinase activity;
CDS_2089	transferase activity, transferring hexosyl groups;
CDS_2091	MAP kinase activity; ATP binding;
CDS_2092	zinc ion binding;
CDS_2093	ATP binding; protein serine/threonine kinase activity;
CDS_2095	protein serine/threonine/tyrosine kinase activity; ATP binding; protein serine/threonine kinase activity;
CDS_2096	ATP binding; protein serine/threonine kinase activity;
CDS_2097	GTP binding;
CDS_2105	hydrolase activity, acting on carbon-nitrogen (but not peptide) bonds, in cyclic amides;
CDS_2106	hydrolase activity, acting on carbon-nitrogen (but not peptide) bonds, in cyclic amides;
CDS_2110	RNA binding;
CDS_2113	glycopeptide alpha-N-acetylgalactosaminidase activity;
CDS_2114	DNA binding;
CDS_2115	protein heterodimerization activity; sequence-specific DNA binding;
CDS_2116	proton-transporting ATPase activity, rotational mechanism; proton-transporting ATP synthase activity, rotational mechanism;
CDS_2118	metal ion binding; metalloendopeptidase activity;
CDS_2119	protein-L-isoaspartate (D-aspartate) O-methyltransferase activity;
CDS_2120	starch synthase activity;
CDS_2121	RNA polymerase II transcription cofactor activity;
CDS_2122	transferase activity;
CDS_2124	zinc ion binding; 5-methyltetrahydropteroyltriglutamate-homocysteine S-methyltransferase activity;
CDS_2128	transferase activity, transferring glycosyl groups;
CDS_2129	sequence-specific DNA binding transcription factor activity; sequence-specific DNA binding;
CDS_2130	transferase activity;
CDS_2131	ATP binding; protein serine/threonine kinase activity;
CDS_2134	galactosyltransferase activity;
CDS_2137	ubiquitin-protein ligase activity;
CDS_2138	ubiquitin-protein ligase activity;
CDS_2140	transferase activity, transferring hexosyl groups;
CDS_2145	translation initiation factor activity;
CDS_2147	nucleotide binding; RNA binding;
CDS_2148	RNA binding;
CDS_2149	structural constituent of ribosome;
CDS_2153	GTPase activity; GTP binding;
CDS_2155	N-acetyltransferase activity;
CDS_2157	starch synthase activity;
CDS_2160	ATP binding; phenylalanine-tRNA ligase activity; tRNA binding;
CDS_2163	catalytic activity;
CDS_2164	RNA binding;
CDS_2165	gibberellin 2-beta-dioxygenase activity; iron ion binding; oxidoreductase activity, acting on single donors with incorporation of molecular oxygen, incorporation of two atoms of oxygen;
CDS_2166	zinc ion binding; nucleic acid binding;
CDS_2167	DNA binding;
CDS_2168	ATP binding; transferase activity;
CDS_2171	protein transporter activity;
CDS_2174	nucleotide binding; zinc ion binding; S-(hydroxymethyl)glutathione dehydrogenase activity;
CDS_2175	oxidoreductase activity; nucleotide binding; zinc ion binding;
CDS_2182	flavin adenine dinucleotide binding; oxidoreductase activity;
CDS_2183	oxidoreductase activity;
CDS_2186	unfolded protein binding;
CDS_2188	electron carrier activity; iron-sulfur cluster binding; NADH dehydrogenase (ubiquinone) activity;
CDS_2189	sequence-specific DNA binding transcription factor activity; sequence-specific DNA binding;
CDS_2190	calcium ion binding;
CDS_2191	catalytic activity;
CDS_2192	ATP binding; tRNA binding;
CDS_2193	adenine phosphoribosyltransferase activity;
CDS_2194	ATP binding; protein serine/threonine kinase activity;
CDS_2195	acid-amino acid ligase activity;
CDS_2197	GTP binding; nucleoside-triphosphatase activity;
CDS_2200	nutrient reservoir activity;
CDS_2201	flavin adenine dinucleotide binding; acyl-CoA dehydrogenase activity;
CDS_2203	DNA binding;
CDS_2204	phosphoenolpyruvate carboxylase activity;
CDS_2207	oxidoreductase activity, acting on the aldehyde or oxo group of donors, NAD or NADP as acceptor;
CDS_2209	oxidoreductase activity; nucleotide binding; zinc ion binding;
CDS_2210	nucleic acid binding; ATP binding; ATP-dependent helicase activity;
CDS_2211	protein serine/threonine kinase activity; ATP binding; sequence-specific DNA binding transcription factor activity;
CDS_2213	metallopeptidase activity; zinc ion binding; aminopeptidase activity;
CDS_2215	diaminopimelate epimerase activity;
CDS_2217	carbohydrate binding; catalytic activity;
CDS_2219	single-stranded DNA binding;
CDS_2220	aspartic-type endopeptidase activity;
CDS_2221	adenosine kinase activity; phosphotransferase activity, alcohol group as acceptor;
CDS_2228	protein phosphatase type 2A regulator activity;
CDS_2229	RNA binding; nucleotide binding;
CDS_2231	aspartic-type endopeptidase activity;
CDS_2237	heme binding; oxidoreductase activity, acting on paired donors, with incorporation or reduction of molecular oxygen; monooxygenase activity; iron ion binding; electron carrier activity;
CDS_2240	coenzyme binding; nucleotide binding; racemase and epimerase activity, acting on carbohydrates and derivatives;
CDS_2242	DNA binding; chromatin binding;
CDS_2243	sequence-specific DNA binding transcription factor activity; sequence-specific DNA binding;
CDS_2245	zinc ion binding;
CDS_2247	protein kinase binding;
CDS_2252	DNA binding; chromatin binding;
CDS_2253	DNA binding; chromatin binding;
CDS_2254	protein transporter activity;
CDS_2255	RNA binding; nucleotide binding; zinc ion binding;
CDS_2256	ubiquitin-protein ligase activity;
CDS_2258	antiporter activity; drug transmembrane transporter activity;
CDS_2259	serine-type endopeptidase activity; ATP binding; ATP-dependent peptidase activity;
CDS_2264	iron-sulfur cluster binding; RNA methyltransferase activity;
CDS_2270	hydrolase activity, hydrolyzing O-glycosyl compounds;
CDS_2271	nucleoside diphosphate kinase activity; metal ion binding; ATP binding;
CDS_2274	hydrogen ion transmembrane transporter activity;
CDS_2275	P-P-bond-hydrolysis-driven protein transmembrane transporter activity;
CDS_2279	heme binding; metal ion binding; peroxidase activity;
CDS_2281	octanoyltransferase activity;
CDS_2287	nucleic acid binding; ATP binding; ATP-dependent helicase activity;
CDS_2288	calcium ion binding;
CDS_2292	ATP binding; protein serine/threonine kinase activity;
CDS_2295	protein kinase activity; ATP binding;
CDS_2297	endonuclease activity; DNA binding; ATP binding;
CDS_2301	DNA binding; structural constituent of ribosome; chromatin binding; RNA binding;
CDS_2306	transferase activity;
CDS_2307	substrate-specific transmembrane transporter activity;
CDS_2311	nucleotidyltransferase activity;
CDS_2316	ATP binding;
CDS_2320	selenium binding;
CDS_2321	ATP binding; protein serine/threonine kinase activity;
CDS_2323	metal ion binding;
CDS_2327	structural constituent of ribosome;
CDS_2328	transcription cofactor activity; zinc ion binding; histone acetyltransferase activity;
CDS_2332	phosphatidylinositol binding;
CDS_2334	sequence-specific DNA binding transcription factor activity; sequence-specific DNA binding;
CDS_2335	DNA binding; protein dimerization activity;
CDS_2339	signal transducer activity;
CDS_2340	signal transducer activity;
CDS_2342	DNA-directed RNA polymerase activity; nucleotide binding;
CDS_2346	acid-amino acid ligase activity;
CDS_2350	ATP binding; ATPase activity;
CDS_2351	polygalacturonase activity;
CDS_2354	nucleic acid binding;
CDS_2358	ATP binding; nucleoside-triphosphatase activity;
CDS_2361	ubiquitin-protein ligase activity;
CDS_2363	nucleic acid binding; nucleotide binding;
CDS_2368	calcium ion binding; ATP binding; protein serine/threonine kinase activity;
CDS_2369	NAD binding; oxidoreductase activity, acting on the aldehyde or oxo group of donors, NAD or NADP as acceptor; NADP binding;
CDS_2371	glutamine-tRNA ligase activity; ATP binding;
CDS_2375	aminoacyl-tRNA editing activity;
CDS_2384	succinate-CoA ligase (ADP-forming) activity; nucleotide binding; cofactor binding; ATP citrate synthase activity;
CDS_2389	zinc ion binding;
CDS_2394	GTP cyclohydrolase I activity;
CDS_2395	calcium ion binding;
CDS_2400	oxidoreductase activity;
CDS_2403	zinc ion binding;
CDS_2406	NADH dehydrogenase (ubiquinone) activity;
CDS_2410	calcium ion binding;
CDS_2411	ketol-acid reductoisomerase activity; metal ion binding; coenzyme binding; nucleotide binding;
CDS_2418	RNA binding;
CDS_2420	transferase activity, transferring glycosyl groups;
CDS_2421	RNA binding;
CDS_2422	GTP binding;
CDS_2426	metal ion binding; protein serine/threonine phosphatase activity;
CDS_2430	electron carrier activity; NADH dehydrogenase (ubiquinone) activity;
CDS_2431	nucleotide binding; L-malate dehydrogenase activity;
CDS_2433	hydrogen ion transmembrane transporter activity;
CDS_2436	heme binding; metal ion binding; peroxidase activity; aspartic-type endopeptidase activity;
CDS_2438	nucleic acid binding; nucleotide binding;
CDS_2449	structural constituent of ribosome;
CDS_2451	calcium ion binding; ATP binding; protein serine/threonine kinase activity;
CDS_2453	nucleotide binding; 3-beta-hydroxy-delta5-steroid dehydrogenase activity;
CDS_2454	structural constituent of ribosome;
CDS_2459	nucleic acid binding; nucleotide binding;
CDS_2465	DNA binding;
CDS_2466	proton-transporting ATP synthase activity, rotational mechanism;
CDS_2467	protein serine/threonine kinase activity; signal transducer activity; ATP binding;
CDS_2468	electron carrier activity;
CDS_2469	structural constituent of ribosome;
CDS_2470	structural constituent of ribosome;
CDS_2474	nucleic acid binding; nucleotide binding;
CDS_2478	hydrolase activity;
CDS_2479	RNA binding; zinc ion binding; RNA-directed DNA polymerase activity; aspartic-type endopeptidase activity;
CDS_2481	transferase activity, transferring acyl groups other than amino-acyl groups;
CDS_2483	nucleic acid binding; nucleotide binding;
CDS_2486	structural constituent of ribosome;
CDS_2488	ATP binding; protein serine/threonine kinase activity;
CDS_2491	nucleic acid binding; nucleotide binding;
CDS_2493	ATP binding; protein serine/threonine kinase activity;
CDS_2494	DNA binding; protein heterodimerization activity;
CDS_2495	amino acid transmembrane transporter activity;
CDS_2497	zinc ion binding; DNA binding;
CDS_2498	zinc ion binding;
CDS_2501	structural constituent of ribosome;
CDS_2507	catalytic activity;
CDS_2508	copper ion binding; quinone binding; primary amine oxidase activity;
CDS_2510	L-ascorbic acid binding; iron ion binding; oxidoreductase activity, acting on paired donors, with incorporation or reduction of molecular oxygen, 2-oxoglutarate as one donor, and incorporation of one atom each of oxygen into both donors;
CDS_2511	metal ion binding; protein serine/threonine phosphatase activity;
CDS_2513	translation initiation factor activity;
CDS_2514	galactosylgalactosylxylosylprotein 3-beta-glucuronosyltransferase activity;
CDS_2517	hydrolase activity;
CDS_2520	structural constituent of ribosome;
CDS_2523	pyridoxal phosphate binding; catalytic activity;
CDS_2527	structural constituent of ribosome;
CDS_2528	pectinesterase activity; enzyme inhibitor activity;
CDS_2530	nucleotidyltransferase activity;
CDS_2536	ATP binding; unfolded protein binding;
CDS_2546	structural constituent of ribosome;
CDS_2547	structural constituent of ribosome;
CDS_2551	DNA binding;
CDS_2552	structural constituent of ribosome;
CDS_2553	structural constituent of ribosome;
CDS_2561	protein tyrosine phosphatase activity; protein tyrosine/serine/threonine phosphatase activity;
CDS_2566	transporter activity;
CDS_2569	DNA-directed RNA polymerase activity; DNA binding; ribonucleoside binding;
CDS_2571	ligase activity; small protein activating enzyme activity; ATP binding;
CDS_2573	cellulose synthase (UDP-forming) activity; zinc ion binding;
CDS_2576	DNA binding; chromatin binding;
CDS_2578	RNA binding;
CDS_2579	dihydroorotate oxidase activity;
CDS_2581	ATP binding; phosphoribosylformylglycinamidine cyclo-ligase activity;
CDS_2582	endonuclease activity; nucleic acid binding;
CDS_2584	electron carrier activity; protein disulfide oxidoreductase activity;
CDS_2594	metal ion binding; heat shock protein binding; ATP binding; unfolded protein binding;
CDS_2595	hydrogen ion transmembrane transporter activity;
CDS_2599	structural constituent of ribosome;
CDS_2602	unfolded protein binding; heat shock protein binding;
CDS_2605	citrate (Si)-synthase activity;
CDS_2606	cysteine synthase activity; transferase activity;
CDS_2608	coenzyme binding; nucleotide binding; dTDP-glucose 4,6-dehydratase activity; dTDP-4-dehydrorhamnose reductase activity;
CDS_2611	RNA binding;
CDS_2614	substrate-specific transmembrane transporter activity;
CDS_2619	citrate (Si)-synthase activity;
CDS_2620	transporter activity;
CDS_2621	NAD+ kinase activity;
CDS_2623	structural constituent of ribosome;
CDS_2624	thiolester hydrolase activity;
CDS_2630	metal ion binding;
CDS_2631	ferredoxin-NAD(P) reductase activity; metal ion binding; 4 iron, 4 sulfur cluster binding;
CDS_2634	structural constituent of ribosome;
CDS_2635	nucleic acid binding; nucleotide binding;
CDS_2637	cytochrome-c oxidase activity;
CDS_2639	electron carrier activity; protein disulfide oxidoreductase activity;
CDS_2641	geranyltranstransferase activity; dimethylallyltranstransferase activity;
CDS_2646	carboxylesterase activity;
CDS_2647	acid-amino acid ligase activity;
CDS_2648	zinc ion binding;
CDS_2649	protein phosphatase type 2A regulator activity;
CDS_2650	catalytic activity; GTP binding;
CDS_2655	oxidoreductase activity, acting on paired donors, with incorporation or reduction of molecular oxygen; iron ion binding; 2 iron, 2 sulfur cluster binding; chlorophyllide a oxygenase [overall] activity;
CDS_2657	chromatin binding;
CDS_2658	chromatin binding;
CDS_2660	protein tyrosine phosphatase activity; protein tyrosine/serine/threonine phosphatase activity; mRNA guanylyltransferase activity; polynucleotide 5'-phosphatase activity;
CDS_2661	1-phosphatidylinositol 4-kinase activity;
CDS_2666	structural molecule activity;
CDS_2669	zinc ion binding;
CDS_2671	nucleoside diphosphate kinase activity; ATP binding;
CDS_2672	selenium binding;
CDS_2673	argininosuccinate lyase activity;
CDS_2674	ATP binding; protein serine/threonine kinase activity;
CDS_2676	ATP binding; protein serine/threonine kinase activity;
CDS_2678	NAD+ ADP-ribosyltransferase activity;
CDS_2681	hydrolase activity, hydrolyzing O-glycosyl compounds;
CDS_2682	calcium ion binding;
CDS_2683	substrate-specific transmembrane transporter activity;
CDS_2684	structural constituent of ribosome;
CDS_2689	GTP binding;
CDS_2691	substrate-specific transmembrane transporter activity;
CDS_2693	GTP binding;
CDS_2694	ATP phosphoribosyltransferase activity; magnesium ion binding;
CDS_2699	calcium ion binding;
CDS_2700	oxidoreductase activity; nucleotide binding;
CDS_2701	zinc ion binding;
CDS_2702	phosphotransferase activity, alcohol group as acceptor;
CDS_2704	oxidoreductase activity; nucleotide binding; zinc ion binding;
CDS_2709	structural constituent of ribosome;
CDS_2710	structural constituent of ribosome;
CDS_2714	uroporphyrinogen decarboxylase activity;
CDS_2717	heme binding; metal ion binding; peroxidase activity;
CDS_2719	structural molecule activity;
CDS_2721	serine-type endopeptidase activity;
CDS_2722	transferase activity, transferring hexosyl groups;
CDS_2723	transferase activity, transferring hexosyl groups;
CDS_2727	NAD binding; oxidoreductase activity, acting on the aldehyde or oxo group of donors, NAD or NADP as acceptor; NADP binding;
CDS_2729	sulfate adenylyltransferase (ATP) activity;
CDS_2730	ATP binding;
CDS_2732	kinase activity;
CDS_2734	nucleic acid binding; ATP binding; ATP-dependent helicase activity;
CDS_2737	ATP binding; protein serine/threonine kinase activity;
CDS_2738	metal ion binding; catalytic activity;
CDS_2740	1,3-beta-D-glucan synthase activity;
CDS_2742	structural constituent of ribosome; RNA binding;
CDS_2746	GTP binding;
CDS_2748	calcium ion binding;
CDS_2753	carbohydrate binding;
CDS_2754	structural constituent of ribosome;
CDS_2758	hydrolase activity;
CDS_2760	zinc ion binding;
CDS_2762	DNA (cytosine-5-)-methyltransferase activity; DNA binding;
CDS_2763	acyl-CoA dehydrogenase activity; cytochrome-c oxidase activity; acyl-CoA oxidase activity; flavin adenine dinucleotide binding;
CDS_2764	oxidoreductase activity; nucleotide binding; zinc ion binding;
CDS_2765	phosphoprotein phosphatase activity; metal ion binding;
CDS_2766	metal ion binding; lactoylglutathione lyase activity;
CDS_2769	methyltransferase activity;
CDS_2772	SNAP receptor activity;
CDS_2774	structural constituent of ribosome;
CDS_2779	NAD-dependent histone deacetylase activity (H3-K18 specific); NAD-dependent histone deacetylase activity (H3-K14 specific); NAD-dependent histone deacetylase activity (H4-K16 specific); NAD-dependent histone deacetylase activity (H3-K9 specific);
CDS_2780	iron ion binding; oxidoreductase activity, acting on paired donors, with incorporation or reduction of molecular oxygen, 2-oxoglutarate as one donor, and incorporation of one atom each of oxygen into both donors;
CDS_2782	serine-type endopeptidase activity;
CDS_2786	carbohydrate binding; beta-galactosidase activity;
CDS_2787	mannitol dehydrogenase activity; nucleotide binding; zinc ion binding;
CDS_2788	substrate-specific transmembrane transporter activity;
CDS_2789	transferase activity, transferring alkyl or aryl (other than methyl) groups;
CDS_2791	ATP binding; protein serine/threonine kinase activity;
CDS_2793	nucleic acid binding;
CDS_2794	peptidase activity;
CDS_2795	serine-type endopeptidase activity;
CDS_2797	transporter activity;
CDS_2799	translation release factor activity, codon specific;
CDS_2800	translation release factor activity, codon specific;
CDS_2801	glutathione transferase activity;
CDS_2802	glutathione transferase activity;
CDS_2803	nucleoside-triphosphatase activity; ATP binding;
CDS_2804	oxidoreductase activity; nucleotide binding; zinc ion binding;
CDS_2807	ATP binding;
CDS_2811	oxidoreductase activity; nucleotide binding; zinc ion binding;
CDS_2812	carbohydrate binding; ATP binding; protein serine/threonine kinase activity;
CDS_2813	catalytic activity;
CDS_2815	phosphoglycolate phosphatase activity;
CDS_2819	lyase activity;
CDS_2820	pyruvate kinase activity; potassium ion binding; magnesium ion binding;
CDS_2821	phosphoglycerate mutase activity; manganese ion binding;
CDS_2822	Rab GTPase activator activity;
CDS_2823	transferase activity, transferring glycosyl groups;
CDS_2825	RNA binding; nucleotide binding;
CDS_2827	metal ion binding; metalloendopeptidase activity;
CDS_2828	oxidoreductase activity, acting on NAD(P)H;
CDS_2829	carbon-carbon lyase activity;
CDS_2831	nucleic acid binding; nucleotide binding;
CDS_2834	sequence-specific DNA binding transcription factor activity; DNA binding;
CDS_2837	ATP binding; galactokinase activity;
CDS_2839	O-methyltransferase activity;
CDS_2841	carbon-sulfur lyase activity;
CDS_2844	nucleic acid binding; nucleotide binding;
CDS_2846	acid-amino acid ligase activity;
CDS_2852	phosphoprotein phosphatase activity;
CDS_2855	peptide-methionine (S)-S-oxide reductase activity;
CDS_2856	phosphoenolpyruvate carboxykinase (ATP) activity; ATP binding;
CDS_2857	translation initiation factor activity;
CDS_2858	translation initiation factor activity;
CDS_2859	acid-amino acid ligase activity;
CDS_2860	acid-amino acid ligase activity;
CDS_2862	DNA binding;
CDS_2863	tyrosine-tRNA ligase activity; ATP binding;
CDS_2864	translation initiation factor activity;
CDS_2865	translation initiation factor activity;
CDS_2869	kinase activity; ATP binding;
CDS_2875	metal ion binding; ATP binding; biotin carboxylase activity; methylcrotonoyl-CoA carboxylase activity;
CDS_2877	lyase activity;
CDS_2883	transferase activity, transferring hexosyl groups;
CDS_2885	phosphopyruvate hydratase activity; magnesium ion binding;
CDS_2887	ATP binding; protein serine/threonine kinase activity;
CDS_2890	translation initiation factor activity;
CDS_2896	nucleoside-triphosphatase activity; ATP binding;
CDS_2897	ATP binding; protein serine/threonine kinase activity;
CDS_2901	hydrogen ion transmembrane transporter activity;
CDS_2906	polygalacturonase activity;
CDS_2909	zinc ion binding;
CDS_2913	hydrolase activity, acting on carbon-nitrogen (but not peptide) bonds;
CDS_2914	transferase activity, transferring acyl groups other than amino-acyl groups;
CDS_2915	transferase activity;
CDS_2916	structural molecule activity;
CDS_2917	sucrose-phosphate synthase activity;
CDS_2918	zinc ion binding; nucleic acid binding;
CDS_2925	structural constituent of ribosome;
CDS_2926	ATP binding; ATP-dependent 5'-3' DNA helicase activity;
CDS_2927	structural molecule activity;
CDS_2930	electron carrier activity; protein disulfide oxidoreductase activity;
CDS_2931	structural constituent of ribosome;
CDS_2932	structural constituent of ribosome;
CDS_2933	amino acid transmembrane transporter activity;
CDS_2936	translation elongation factor activity; GTPase activity; GTP binding;
CDS_2941	ATP binding; unfolded protein binding; nucleoside-triphosphatase activity;
CDS_2942	nucleic acid binding; nucleotide binding;
CDS_2943	ATP binding; phosphoribosylformylglycinamidine synthase activity;
CDS_2944	acid-amino acid ligase activity;
CDS_2952	transferase activity, transferring acyl groups other than amino-acyl groups;
CDS_2956	oxidoreductase activity; nucleotide binding;
CDS_2960	4 iron, 4 sulfur cluster binding;
CDS_2961	calcium-transporting ATPase activity; calmodulin binding; metal ion binding; ATP binding;
CDS_2962	pyridoxal phosphate binding; carboxy-lyase activity;
CDS_2963	protein kinase C binding; histone deacetylase binding; drug binding; protein C-terminus binding; ubiquitin binding; protein heterodimerization activity; magnesium ion binding; protein homodimerization activity; chromatin binding; ATP binding; DNA topoisomerase type II (ATP-hydrolyzing) activity; DNA binding, bending;
CDS_2965	nucleic acid binding; nucleotide binding;
CDS_2967	electron carrier activity; iron-sulfur cluster binding;
CDS_2968	electron carrier activity;
CDS_2972	hydrolase activity;
CDS_2974	amino acid binding;
CDS_2980	catalytic activity; magnesium ion binding; thiamine pyrophosphate binding;
CDS_2981	structural constituent of ribosome;
CDS_2987	structural constituent of ribosome;
CDS_2989	metal ion binding;
CDS_2992	magnesium ion binding; intramolecular transferase activity, phosphotransferases;
CDS_3003	protein binding involved in protein folding;
CDS_3004	antiporter activity; drug transmembrane transporter activity;
CDS_3005	binding;
CDS_3006	nucleic acid binding;
CDS_3008	glycolipid transporter activity; glycolipid binding;
CDS_3009	transferase activity, transferring phosphorus-containing groups; organic cyclic compound binding; heterocyclic compound binding;
CDS_3012	methyltransferase activity;
CDS_3015	phosphopyruvate hydratase activity; magnesium ion binding;
CDS_3020	catalytic activity;
CDS_3023	metalloendopeptidase activity; ATP binding; nucleoside-triphosphatase activity; zinc ion binding;
CDS_3024	copper ion binding; electron carrier activity;
CDS_3025	structural constituent of ribosome;
CDS_3026	zinc ion binding;
CDS_3027	MAP kinase activity; ATP binding;
CDS_3029	structural constituent of ribosome;
CDS_3031	ATP binding;
CDS_3032	ATP binding;
CDS_3035	calcium ion binding;
CDS_3036	galactinol-raffinose galactosyltransferase activity;
CDS_3039	DNA binding;
CDS_3040	DNA binding;
CDS_3041	damaged DNA binding;
CDS_3042	nucleic acid binding; nucleotide binding;
CDS_3043	zinc ion binding;
CDS_3050	structural constituent of ribosome;
CDS_3055	N-acetyltransferase activity;
CDS_3056	ATP binding; protein serine/threonine kinase activity;
CDS_3057	DNA-directed RNA polymerase activity; DNA binding;
CDS_3059	glutamate 5-kinase activity; glutamate-5-semialdehyde dehydrogenase activity;
CDS_3064	thiolester hydrolase activity;
CDS_3065	structural constituent of ribosome;
CDS_3068	NADH dehydrogenase (ubiquinone) activity; protein kinase activity; ATP binding; zinc ion binding;
CDS_3070	carbohydrate binding; hydrolase activity, hydrolyzing O-glycosyl compounds;
CDS_3071	zinc ion binding; nucleic acid binding; nucleotide binding;
CDS_3075	peptidyl-prolyl cis-trans isomerase activity;
CDS_3078	NAD binding; metal ion binding; malate dehydrogenase (oxaloacetate-decarboxylating) activity;
CDS_3079	cysteine-type peptidase activity; ubiquitin thiolesterase activity;
CDS_3080	ubiquitin-protein ligase activity; peptidyl-prolyl cis-trans isomerase activity;
CDS_3082	structural molecule activity;
CDS_3084	zinc ion binding;
CDS_3091	transporter activity;
CDS_3092	homocysteine S-methyltransferase activity;
CDS_3095	structural constituent of ribosome;
CDS_3101	ligase activity; small protein activating enzyme activity; ATP binding;
CDS_3102	fatty-acyl-CoA binding;
CDS_3104	nuclease activity;
CDS_3106	zinc ion binding;
CDS_3107	structural constituent of ribosome;
CDS_3108	sequence-specific DNA binding transcription factor activity; sequence-specific DNA binding;
CDS_3109	acid-amino acid ligase activity;
CDS_3110	nucleic acid binding; nucleotide binding;
CDS_3119	proton-transporting ATPase activity, rotational mechanism;
CDS_3120	proton-transporting ATPase activity, rotational mechanism;
CDS_3124	hydroxyacylglutathione hydrolase activity; zinc ion binding;
CDS_3125	endonuclease activity; nucleic acid binding;
CDS_3128	ubiquitin-protein ligase activity; zinc ion binding;
CDS_3133	beta-galactosidase activity;
CDS_3134	oxidoreductase activity; iron ion binding; heme binding; electron transporter, transferring electrons within cytochrome b6/f complex of photosystem II activity;
CDS_3135	flavin adenine dinucleotide binding; isovaleryl-CoA dehydrogenase activity;
CDS_3138	flavin adenine dinucleotide binding; thiamine pyrophosphate binding; magnesium ion binding; acetolactate synthase activity;
CDS_3139	calcium ion binding;
CDS_3142	metal ion binding; superoxide dismutase activity;
CDS_3143	1-acylglycerol-3-phosphate O-acyltransferase activity;
CDS_3148	ATP binding; proton-transporting ATPase activity, rotational mechanism;
CDS_3149	zinc ion binding;
CDS_3151	zinc ion binding; metalloexopeptidase activity; aminopeptidase activity;
CDS_3152	hydrogen ion transmembrane transporter activity;
CDS_3153	serine-type endopeptidase activity;
CDS_3154	peptidyl-prolyl cis-trans isomerase activity;
CDS_3157	metal ion binding; superoxide dismutase activity;
CDS_3158	metal ion binding; protein serine/threonine phosphatase activity;
CDS_3161	NAD binding; 4 iron, 4 sulfur cluster binding; NADH dehydrogenase (ubiquinone) activity; FMN binding;
CDS_3165	sequence-specific DNA binding transcription factor activity; DNA binding;
CDS_3168	zinc ion binding;
CDS_3170	quinolinate synthetase A activity;
CDS_3171	phosphotransferase activity, for other substituted phosphate groups;
CDS_3173	galactosyltransferase activity;
CDS_3175	hydrogen ion transmembrane transporter activity;
CDS_3176	hydrolase activity, acting on carbon-nitrogen (but not peptide) bonds;
CDS_3178	sequence-specific DNA binding transcription factor activity; sequence-specific DNA binding;
CDS_3179	sequence-specific DNA binding transcription factor activity; transcription factor binding; double-stranded DNA binding;
CDS_3180	calcium ion binding; calcium-dependent phospholipid binding;
CDS_3181	serine-type endopeptidase activity;
CDS_3187	tryptophan synthase activity;
CDS_3189	ADP binding;
CDS_3192	ubiquitin-protein ligase activity; zinc ion binding;
CDS_3194	zinc ion binding;
CDS_3196	transferase activity, transferring glycosyl groups;
CDS_3201	phospholipid binding; GTPase activity; GTP binding;
CDS_3202	structural constituent of ribosome;
CDS_3205	protein transporter activity;
CDS_3206	GTP binding;
CDS_3209	heme binding;
CDS_3211	peptidyl-prolyl cis-trans isomerase activity;
CDS_3212	hydrolase activity;
CDS_3218	ATP binding; galactokinase activity;
CDS_3219	ATP binding; galactokinase activity;
CDS_3221	translation elongation factor activity;
CDS_3225	peptidyl-prolyl cis-trans isomerase activity;
CDS_3226	transferase activity, transferring acyl groups other than amino-acyl groups;
CDS_3229	oligosaccharyl transferase activity;
CDS_3231	amino acid transmembrane transporter activity;
CDS_3232	phosphatase activator activity;
CDS_3239	ATP binding; protein serine/threonine kinase activity;
CDS_3240	nucleic acid binding;
CDS_3242	structural constituent of ribosome;
CDS_3243	transferase activity, transferring hexosyl groups;
CDS_3247	structural constituent of ribosome; rRNA binding;
CDS_3248	structural constituent of ribosome; rRNA binding;
CDS_3250	zinc ion binding;
CDS_3256	metal ion binding;
CDS_3257	nucleotide binding; coenzyme binding; catalytic activity;
CDS_3258	structural constituent of ribosome;
CDS_3263	methyltransferase activity;
CDS_3265	zinc ion binding;
CDS_3267	prenyltransferase activity;
CDS_3268	catalytic activity;
CDS_3269	RNA binding; nucleotide binding;
CDS_3272	structural constituent of ribosome; rRNA binding;
CDS_3273	structural constituent of ribosome; rRNA binding;
CDS_3276	heme binding; oxidoreductase activity, acting on paired donors, with incorporation or reduction of molecular oxygen; monooxygenase activity; iron ion binding; electron carrier activity;
CDS_3278	carbohydrate binding; galactosyltransferase activity;
CDS_3281	threonine-type endopeptidase activity;
CDS_3285	substrate-specific transmembrane transporter activity;
CDS_3288	transferase activity;
CDS_3290	cofactor binding; oxidoreductase activity, acting on the CH-OH group of donors, NAD or NADP as acceptor; nucleotide binding;
CDS_3300	iron ion binding; oxidoreductase activity, acting on paired donors, with incorporation or reduction of molecular oxygen, 2-oxoglutarate as one donor, and incorporation of one atom each of oxygen into both donors;
CDS_3302	nucleic acid binding; nucleotide binding;
CDS_3305	glutathione peroxidase activity;
CDS_3306	1-phosphatidylinositol binding; clathrin binding;
CDS_3309	metal ion binding; electron carrier activity; 2 iron, 2 sulfur cluster binding;
CDS_3310	hydrogen ion transmembrane transporter activity;
CDS_3313	protein tyrosine phosphatase activity;
CDS_3314	ubiquitin-protein ligase activity;
CDS_3317	iron ion binding; iron-sulfur cluster binding;
CDS_3318	oxidoreductase activity;
CDS_3322	calcium ion binding;
CDS_3326	translation initiation factor activity; GTPase activity; GTP binding;
CDS_3329	calcium ion binding; calcium-dependent phospholipid binding;
CDS_3330	calcium ion binding; calcium-dependent phospholipid binding;
CDS_3332	catalytic activity;
CDS_3334	metal ion binding; protein serine/threonine phosphatase activity;
CDS_3339	acid-amino acid ligase activity;
CDS_3343	iron ion binding;
CDS_3347	metal ion binding; electron carrier activity; 2 iron, 2 sulfur cluster binding;
CDS_3349	hydrolase activity, acting on acid anhydrides, catalyzing transmembrane movement of substances;
CDS_3356	metal ion binding; protein serine/threonine phosphatase activity;
CDS_3359	phosphatase activity;
CDS_3362	metal ion binding; lactoylglutathione lyase activity;
CDS_3363	hydrolase activity;
CDS_3368	phosphoprotein phosphatase activity; metal ion binding;
CDS_3374	acid-amino acid ligase activity;
CDS_3376	ATP binding; protein serine/threonine kinase activity;
CDS_3378	structural constituent of ribosome;
CDS_3380	DNA binding;
CDS_3385	protein transporter activity;
CDS_3387	hydrolase activity, hydrolyzing O-glycosyl compounds; xyloglucan:xyloglucosyl transferase activity;
CDS_3388	antiporter activity; drug transmembrane transporter activity;
CDS_3390	zinc ion binding; DNA binding;
CDS_3393	nucleic acid binding; nucleotide binding;
CDS_3394	nucleic acid binding; nucleotide binding;
CDS_3396	metal ion binding; lactoylglutathione lyase activity;
CDS_3397	thiol oxidase activity; isomerase activity;
CDS_3399	GTPase activity; GTP binding;
CDS_3402	zinc ion binding;
CDS_3405	ATP binding; unfolded protein binding;
CDS_3406	ATP binding; unfolded protein binding;
CDS_3408	ATP binding; hexokinase activity;
CDS_3412	transferase activity, transferring hexosyl groups;
CDS_3415	zinc ion binding; nucleic acid binding;
CDS_3416	sequence-specific DNA binding transcription factor activity; DNA binding;
CDS_3426	5'-3' exoribonuclease activity; nucleic acid binding; zinc ion binding;
CDS_3429	zeaxanthin epoxidase [overall] activity;
CDS_3432	molybdenum ion binding; pyridoxal phosphate binding; catalytic activity;
CDS_3434	diacylglycerol kinase activity;
CDS_3435	calcium ion binding;
CDS_3436	nucleotide binding;
CDS_3439	metal ion binding;
CDS_3449	catalytic activity;
CDS_3451	hydrolase activity;
CDS_3452	zinc ion binding;
CDS_3455	transferase activity, transferring hexosyl groups;
CDS_3456	GTP binding;
CDS_3457	ATP binding; unfolded protein binding;
CDS_3462	cysteine-type endopeptidase inhibitor activity;
CDS_3464	zinc ion binding;
CDS_3465	transferase activity;
CDS_3467	acetylglucosaminyltransferase activity;
CDS_3472	zinc ion binding;
CDS_3473	structural constituent of ribosome; RNA binding;
CDS_3476	serine-type endopeptidase inhibitor activity;
CDS_3477	pseudouridine synthase activity; snoRNA binding;
CDS_3480	peptide-methionine (R)-S-oxide reductase activity;
CDS_3482	ATP binding; helicase activity; DNA binding; zinc ion binding;
CDS_3483	O-acyltransferase activity;
CDS_3485	metal ion binding; hydrolase activity;
CDS_3490	catalytic activity;
CDS_3491	catalytic activity;
CDS_3492	DNA-directed RNA polymerase activity; DNA binding; protein dimerization activity;
CDS_3501	flavin adenine dinucleotide binding; acyl-CoA dehydrogenase activity;
CDS_3502	metal ion binding; metalloexopeptidase activity; aminopeptidase activity;
CDS_3504	UMP kinase activity;
CDS_3506	protein phosphatase type 2A regulator activity;
CDS_3509	transferase activity, transferring hexosyl groups;
CDS_3515	ATP binding; ATPase activity;
CDS_3517	structural constituent of ribosome;
CDS_3519	nucleotide binding;
CDS_3523	sedoheptulose-7-phosphate:D-glyceraldehyde-3-phosphate glyceronetransferase activity;
CDS_3534	zinc ion binding;
CDS_3536	protein C-terminus binding; zinc ion binding;
CDS_3545	metal ion binding;
CDS_3546	catalytic activity;
CDS_3547	iron ion binding;
CDS_3548	zinc ion binding;
CDS_3554	sequence-specific DNA binding transcription factor activity; DNA binding; nucleotidyltransferase activity;
CDS_3555	isoleucine-tRNA ligase activity; aminoacyl-tRNA editing activity; ATP binding;
CDS_3558	transferase activity, transferring hexosyl groups;
CDS_3563	DNA binding; protein heterodimerization activity;
CDS_3565	DNA binding;
CDS_3566	actin binding;
CDS_3571	ATP binding; ATPase activity;
CDS_3572	ubiquitin protein ligase binding;
CDS_3578	lyase activity;
CDS_3579	zinc ion binding;
CDS_3588	ER retention sequence binding;
CDS_3590	structural constituent of ribosome;
CDS_3592	ATP binding; hydrolase activity, acting on acid anhydrides, in phosphorus-containing anhydrides;
CDS_3596	catalytic activity;
CDS_3600	structural constituent of ribosome;
CDS_3601	metal ion binding; aminopeptidase activity;
CDS_3604	RNA binding;
CDS_3613	iron ion binding; oxidoreductase activity, acting on paired donors, with incorporation or reduction of molecular oxygen, 2-oxoglutarate as one donor, and incorporation of one atom each of oxygen into both donors;
CDS_3614	magnesium ion binding; acireductone synthase activity;
CDS_3617	calcium ion binding;
CDS_3619	ATP binding; ATPase activity;
CDS_3620	peptidyl-prolyl cis-trans isomerase activity;
CDS_3621	enzyme regulator activity;
CDS_3625	zinc ion binding; nucleic acid binding;
CDS_3626	secondary active sulfate transmembrane transporter activity;
CDS_3628	pyridoxal phosphate binding; cysteine desulfurase activity;
CDS_3629	P-P-bond-hydrolysis-driven protein transmembrane transporter activity;
CDS_3632	carbohydrate binding; isomerase activity;
CDS_3633	hydrolase activity;
CDS_3634	ATP binding;
CDS_3636	phosphotransferase activity, alcohol group as acceptor; kinase activity; ATP binding;
CDS_3638	DNA binding; RNA cap binding; translation initiation factor activity;
CDS_3639	glutamate-ammonia ligase activity; ATP binding;
CDS_3641	oxidoreductase activity; ATP binding; microtubule motor activity;
CDS_3642	enzyme regulator activity;
CDS_3643	enzyme regulator activity;
CDS_3645	P-P-bond-hydrolysis-driven protein transmembrane transporter activity;
CDS_3646	ATP binding; protein serine/threonine kinase activity;
CDS_3648	beta-amylase activity;
CDS_3655	sequence-specific DNA binding transcription factor activity; sequence-specific DNA binding; zinc ion binding;
CDS_3657	nucleic acid binding; ATP binding; ATP-dependent helicase activity;
CDS_3658	NAD+ kinase activity;
CDS_3660	zinc ion binding;
CDS_3662	GTPase activity; GTP binding;
CDS_3666	calcium ion binding;
CDS_3667	structural constituent of ribosome;
CDS_3670	fructose-bisphosphate aldolase activity;
CDS_3674	inositol-1,3,4-trisphosphate 5-kinase activity; inositol tetrakisphosphate 1-kinase activity; ATP binding; magnesium ion binding; inositol-1,3,4-trisphosphate 6-kinase activity;
CDS_3676	metalloendopeptidase activity; ATP binding; nucleoside-triphosphatase activity;
CDS_3678	proton-transporting ATPase activity, rotational mechanism;
CDS_3679	damaged DNA binding;
CDS_3680	damaged DNA binding;
CDS_3682	NAD+ ADP-ribosyltransferase activity;
CDS_3683	MAP kinase activity; ATP binding;
CDS_3684	ligase activity;
CDS_3685	sequence-specific DNA binding transcription factor activity; sequence-specific DNA binding;
CDS_3687	zinc ion binding;
CDS_3691	dolichyl-diphosphooligosaccharide-protein glycotransferase activity;
CDS_3692	electron carrier activity; protein disulfide oxidoreductase activity;
CDS_3693	structural constituent of ribosome;
CDS_3701	hydrolase activity, acting on ester bonds;
CDS_3702	zinc ion binding; nucleic acid binding; nucleotide binding;
CDS_3704	cytochrome-c oxidase activity;
CDS_3708	ATP binding; nucleoside-triphosphatase activity;
CDS_3711	metal ion binding; heat shock protein binding; ATP binding; unfolded protein binding;
CDS_3712	biotin transporter activity;
CDS_3715	structural constituent of ribosome; RNA binding;
CDS_3726	transferase activity, transferring acyl groups other than amino-acyl groups;
CDS_3727	metal ion binding;
CDS_3731	zinc ion binding;
CDS_3732	protein kinase activity; ATP binding;
CDS_3733	zinc ion binding; nucleic acid binding;
CDS_3735	transferase activity, transferring hexosyl groups;
CDS_3739	calcium-transporting ATPase activity; calmodulin binding; metal ion binding; ATP binding;
CDS_3743	ATP binding; proton-transporting ATPase activity, rotational mechanism;
CDS_3745	transferase activity, transferring acyl groups other than amino-acyl groups; zinc ion binding;
CDS_3746	transferase activity, transferring acyl groups other than amino-acyl groups; zinc ion binding;
CDS_3748	metallocarboxypeptidase activity; zinc ion binding;
CDS_3756	electron carrier activity; monooxygenase activity; iron ion binding; heme binding; oxidoreductase activity, acting on paired donors, with incorporation or reduction of molecular oxygen;
CDS_3759	actin binding; calcium ion binding;
CDS_3767	oxidoreductase activity, acting on the CH-CH group of donors;
CDS_3771	hydrolase activity;
CDS_3772	DNA-directed RNA polymerase activity; DNA binding;
CDS_3775	DNA binding; chromatin binding;
CDS_3780	ATP binding; protein serine/threonine kinase activity;
CDS_3781	nucleic acid binding; nucleotide binding;
CDS_3784	protein binding; GTPase activity; GTP binding;
CDS_3790	pyridoxal phosphate binding; lyase activity;
CDS_3794	sucrose transmembrane transporter activity;
CDS_3802	protein dimerization activity;
CDS_3806	structural constituent of ribosome;
CDS_3807	1-phosphatidylinositol-4-phosphate 5-kinase activity; ATP binding;
CDS_3811	aminoacyl-tRNA hydrolase activity;
CDS_3812	oxidoreductase activity, acting on the CH-CH group of donors;
CDS_3820	hydrolase activity, hydrolyzing O-glycosyl compounds; xyloglucan:xyloglucosyl transferase activity;
CDS_3821	dolichyl-diphosphooligosaccharide-protein glycotransferase activity;
CDS_3823	SNAP receptor activity;
CDS_3824	structural constituent of ribosome; RNA binding;
CDS_3825	structural constituent of ribosome;
CDS_3827	DNA binding; sequence-specific DNA binding transcription factor activity;
CDS_3834	GTP binding;
CDS_3836	acetyl-CoA carboxylase activity;
CDS_3837	amino acid transmembrane transporter activity;
CDS_3838	alkylbase DNA N-glycosylase activity; DNA binding;
CDS_3846	zinc ion binding;
CDS_3849	antiporter activity; drug transmembrane transporter activity;
CDS_3853	nucleic acid binding;
CDS_3856	hydrolase activity, acting on acid anhydrides; GTP binding;
CDS_3859	translation initiation factor activity; ribosomal large subunit binding; ribosome binding;
CDS_3865	methyltransferase activity;
CDS_3874	metal ion binding; protein serine/threonine phosphatase activity;
CDS_3876	structural molecule activity;
CDS_3877	metal ion binding; acid phosphatase activity;
CDS_3878	chitinase activity;
CDS_3879	flavin adenine dinucleotide binding; electron carrier activity;
CDS_3891	kinase activity;
CDS_3892	metal ion binding; catalytic activity;
CDS_3893	DNA-directed RNA polymerase activity; DNA binding;
CDS_3894	methyltransferase activity;
CDS_3896	phosphoribosylaminoimidazolecarboxamide formyltransferase activity; IMP cyclohydrolase activity;
CDS_3897	methylenetetrahydrofolate dehydrogenase (NADP+) activity; nucleotide binding;
CDS_3902	DNA photolyase activity;
CDS_3904	methyltransferase activity;
CDS_3906	structural constituent of ribosome;
CDS_3907	metal ion binding;
CDS_3909	pyridoxal phosphate binding; threonine synthase activity;
CDS_3910	pyridoxal phosphate binding; threonine synthase activity;
CDS_3911	isomerase activity;
CDS_3912	translation initiation factor activity;
CDS_3913	ATP binding; nucleoside-triphosphatase activity;
CDS_3914	ATP binding; protein serine/threonine kinase activity;
CDS_3915	protein kinase binding;
CDS_3916	organic phosphonate transmembrane-transporting ATPase activity; ATP binding;
CDS_3917	NADPH-hemoprotein reductase activity; iron ion binding; FMN binding;
CDS_3918	calcium-transporting ATPase activity; metal ion binding; ATP binding;
CDS_3922	GTPase activity; structural constituent of cytoskeleton; GTP binding;
CDS_3923	phosphoprotein phosphatase activity;
CDS_3924	phosphoprotein phosphatase activity;
CDS_3926	GTP binding;
CDS_3930	potassium ion transmembrane transporter activity;
CDS_3931	NAD+ ADP-ribosyltransferase activity;
CDS_3932	DNA binding; chromatin binding;
CDS_3934	DNA binding;
CDS_3935	translation initiation factor activity;
CDS_3940	transferase activity, transferring glycosyl groups;
CDS_3941	carbohydrate binding; hydrolase activity, hydrolyzing O-glycosyl compounds;
CDS_3944	zinc ion binding;
CDS_3947	ubiquitin protein ligase binding;
CDS_3951	sequence-specific DNA binding transcription factor activity; sequence-specific DNA binding;
CDS_3953	glutathione peroxidase activity;
CDS_3954	protein kinase binding;
CDS_3956	DNA binding; zinc ion binding;
CDS_3962	nucleic acid binding; nucleotide binding;
CDS_3965	oxidoreductase activity;
CDS_3966	ATP binding; microtubule motor activity;
CDS_3969	nucleoside-triphosphatase activity; ATP binding;
CDS_3970	thymidine kinase activity; DNA binding; ATP binding; zinc ion binding;
CDS_3971	structural constituent of ribosome;
CDS_3974	zinc ion binding;
CDS_3978	electron carrier activity; protein disulfide oxidoreductase activity;
CDS_3984	heme binding; oxidoreductase activity, acting on paired donors, with incorporation or reduction of molecular oxygen; monooxygenase activity; iron ion binding; electron carrier activity;
CDS_3987	serine-type endopeptidase activity; ATP binding; ATP-dependent peptidase activity;
CDS_3988	hydroxymethyl-, formyl- and related transferase activity;
CDS_3989	actin binding;
CDS_3993	zinc ion binding;
CDS_3995	ATP binding; protein serine/threonine kinase activity;
CDS_3996	ATP binding; unfolded protein binding;
CDS_3999	chromatin binding; UMP kinase activity;
CDS_4000	structural constituent of ribosome;
CDS_4010	serine-type peptidase activity;
CDS_4011	hydrolase activity;
CDS_4020	binding; catalytic activity;
CDS_4022	ATP binding; protein serine/threonine kinase activity;
CDS_4023	ATP binding; protein serine/threonine kinase activity;
CDS_4029	nucleotide binding;
CDS_4030	orotidine-5'-phosphate decarboxylase activity; orotate phosphoribosyltransferase activity;
CDS_4031	tryptophan-tRNA ligase activity; ATP binding;
CDS_4032	zinc ion binding;
CDS_4038	structural constituent of ribosome;
CDS_4039	phosphotransferase activity, alcohol group as acceptor; kinase activity; ATP binding;
CDS_4049	nucleic acid binding; ATP binding; ATP-dependent helicase activity;
CDS_4053	nucleoside-triphosphatase activity; ATP binding;
CDS_4064	oxidoreductase activity, acting on paired donors, with incorporation or reduction of molecular oxygen, 2-oxoglutarate as one donor, and incorporation of one atom each of oxygen into both donors;
CDS_4065	kinase activity; ATP binding;
CDS_4066	DNA binding; sequence-specific DNA binding transcription factor activity;
CDS_4067	valine-tRNA ligase activity; aminoacyl-tRNA editing activity; ATP binding;
CDS_4070	GTP binding;
CDS_4073	nucleotide binding;
CDS_4074	oxidoreductase activity;
CDS_4077	hydrolase activity, hydrolyzing O-glycosyl compounds;
CDS_4078	nucleic acid binding; nucleotide binding;
CDS_4079	acetylglucosaminyltransferase activity;
CDS_4082	serine-type endopeptidase activity;
CDS_4083	serine-type endopeptidase activity;
CDS_4085	nucleic acid binding; nucleotide binding;
CDS_4086	copper ion binding; quinone binding;
CDS_4087	metal ion binding;
CDS_4089	calcium ion binding;
CDS_4090	electron carrier activity; iron-sulfur cluster binding;
CDS_4091	nucleic acid binding;
CDS_4093	binding;
CDS_4094	transferase activity; pyridoxal phosphate binding;
CDS_4095	oxidoreductase activity; nucleotide binding; zinc ion binding;
CDS_4100	heme oxygenase (decyclizing) activity;
CDS_4101	protein transporter activity;
CDS_4103	nucleic acid binding; zinc ion binding;
CDS_4105	sequence-specific DNA binding transcription factor activity; sequence-specific DNA binding;
CDS_4107	mannosyl-glycoprotein endo-beta-N-acetylglucosaminidase activity;
CDS_4108	ribonuclease activity;
CDS_4109	RNA binding;
CDS_4113	GTP binding;
CDS_4115	ATPase activity, coupled to transmembrane movement of substances; ATP binding;
CDS_4118	flavin adenine dinucleotide binding; oxidoreductase activity;
CDS_4130	nucleic acid binding; nucleotide binding;
CDS_4135	nucleic acid binding; nucleotide binding;
CDS_4142	alpha-amylase activity; calcium ion binding;
CDS_4145	calcium ion binding;
CDS_4146	hydroxymethylbilane synthase activity;
CDS_4147	GTPase activity; structural constituent of cytoskeleton; GTP binding;
CDS_4151	ATPase activity, coupled; ATP binding;
CDS_4154	nucleic acid binding;
CDS_4155	RNA binding; nucleotide binding;
CDS_4157	protein dimerization activity;
CDS_4161	metal ion binding; hydrolase activity; oxidoreductase activity; electron carrier activity; FMN binding;
CDS_4162	zinc ion binding; nucleic acid binding;
CDS_4164	DNA binding;
CDS_4166	PDZ domain binding; receptor tyrosine kinase binding; Rac GTPase activator activity; Rac GTPase binding;
CDS_4174	beta-amylase activity;
CDS_4176	pyridoxal phosphate binding; cysteine desulfurase activity;
CDS_4177	DNA binding; chromatin binding;
CDS_4180	metal ion binding; nucleotide binding; IMP dehydrogenase activity;
CDS_4184	zinc ion binding; DNA binding;
CDS_4187	heme binding; electron carrier activity; iron ion binding;
CDS_4191	zinc ion binding;
CDS_4192	catalytic activity;
CDS_4200	nucleic acid binding; nucleotide binding;
CDS_4201	oxidoreductase activity; nucleotide binding;
CDS_4203	N-acetyltransferase activity; iron-sulfur cluster binding;
CDS_4208	flavin adenine dinucleotide binding; oxidoreductase activity;
CDS_4212	protein dimerization activity;
CDS_4214	nucleic acid binding; ATP binding; ATP-dependent helicase activity;
CDS_4223	proton-transporting ATPase activity, rotational mechanism;
CDS_4225	nucleic acid binding; zinc ion binding;
CDS_4227	carbohydrate binding; alpha-mannosidase activity; zinc ion binding;
CDS_4228	3-oxoacyl-[acyl-carrier-protein] synthase activity;
CDS_4233	oxidoreductase activity, acting on paired donors, with incorporation or reduction of molecular oxygen, 2-oxoglutarate as one donor, and incorporation of one atom each of oxygen into both donors;
CDS_4240	catalytic activity;
CDS_4249	sequence-specific DNA binding transcription factor activity; sequence-specific DNA binding;
CDS_4256	malate synthase activity;
CDS_4261	ATP binding; protein serine/threonine kinase activity;
CDS_4263	glutathione peroxidase activity;
CDS_4267	structural constituent of ribosome;
CDS_4268	structural constituent of ribosome;
CDS_4269	zinc ion binding;
CDS_4275	oxidoreductase activity; iron ion binding;
CDS_4277	7S RNA binding; GTPase activity; GTP binding;
CDS_4278	peptidase activity;
CDS_4279	peptidase activity;
CDS_4282	methyltransferase activity;
CDS_4283	translation initiation factor activity;
CDS_4291	NAD binding; glycerol-3-phosphate dehydrogenase [NAD+] activity;
CDS_4294	transferase activity;
CDS_4296	zinc ion binding;
CDS_4303	heme binding; electron carrier activity; iron ion binding;
CDS_4304	ATP binding; ATPase activity;
CDS_4308	ATP binding; protein serine/threonine kinase activity;
CDS_4309	FMN binding; riboflavin reductase (NADPH) activity;
CDS_4310	RNA binding;
CDS_4311	RNA binding;
CDS_4313	signal transducer activity; phosphatidylinositol phospholipase C activity; calcium ion binding;
CDS_4316	oxidoreductase activity, acting on the CH-CH group of donors, NAD or NADP as acceptor; geranylgeranyl reductase activity; nucleotide binding;
CDS_4320	amino acid binding;
CDS_4325	zinc ion binding;
CDS_4329	ATP binding; protein serine/threonine kinase activity;
CDS_4330	threonine-type endopeptidase activity;
CDS_4332	acid-amino acid ligase activity;
CDS_4342	translation elongation factor activity;
CDS_4347	nucleoside-triphosphatase activity; ATP binding;
CDS_4348	hydrolase activity;
CDS_4351	zinc ion binding;
CDS_4352	nucleic acid binding; nucleotide binding;
CDS_4353	NAD binding; zinc ion binding; histidinol dehydrogenase activity;
CDS_4357	protein heterodimerization activity;
CDS_4358	cysteine-type peptidase activity;
CDS_4359	copper ion binding; quinone binding;
CDS_4360	ATP binding; unfolded protein binding;
CDS_4363	methyltransferase activity;
CDS_4366	GTP binding;
CDS_4368	ATP binding; protein serine/threonine kinase activity;
CDS_4369	nucleic acid binding; nucleotide binding;
CDS_4372	translation initiation factor activity;
CDS_4373	voltage-gated potassium channel activity;
CDS_4374	manganese ion binding; metalloexopeptidase activity; aminopeptidase activity;
CDS_4378	cofactor binding; oxidoreductase activity, acting on the CH-OH group of donors, NAD or NADP as acceptor; nucleotide binding;
CDS_4379	NAD binding; metal ion binding; malate dehydrogenase (oxaloacetate-decarboxylating) activity;
CDS_4383	translation elongation factor activity; GTPase activity; GTP binding;
CDS_4384	metal ion binding; protein serine/threonine phosphatase activity;
CDS_4394	hydrolase activity, hydrolyzing O-glycosyl compounds; cation binding; 1,4-alpha-glucan branching enzyme activity;
CDS_4396	DNA-directed RNA polymerase activity; DNA binding;
CDS_4397	phosphorelay response regulator activity; ATP binding; phosphorelay sensor kinase activity;
CDS_4399	nucleotide binding; coenzyme binding; catalytic activity;
CDS_4401	nucleic acid binding; nucleotide binding;
CDS_4403	hydrolase activity, acting on ester bonds; nucleic acid binding;
CDS_4404	metal ion binding; heat shock protein binding; ATP binding; unfolded protein binding;
CDS_4420	amino acid transmembrane transporter activity;
CDS_4423	oxidoreductase activity; nucleotide binding; zinc ion binding;
CDS_4425	structural constituent of ribosome;
CDS_4428	nucleic acid binding; nucleotide binding;
CDS_4431	heme binding; oxidoreductase activity, acting on paired donors, with incorporation or reduction of molecular oxygen; monooxygenase activity; iron ion binding; electron carrier activity;
CDS_4434	potassium ion transmembrane transporter activity;
CDS_4437	DNA binding; sequence-specific DNA binding transcription factor activity;
CDS_4438	endonuclease activity; damaged DNA binding;
CDS_4439	translation elongation factor activity; GTP binding; GTPase activity;
CDS_4441	nucleotide binding;
CDS_4442	zinc ion binding;
CDS_4452	potassium-transporting ATPase activity; ATP binding; magnesium ion binding;
CDS_4456	NAD binding; isocitrate dehydrogenase (NADP+) activity; magnesium ion binding;
CDS_4457	ATP binding; protein serine/threonine kinase activity;
CDS_4458	pullulanase activity; cation binding;
CDS_4460	ubiquitin-protein ligase activity; zinc ion binding;
CDS_4463	zinc ion binding;
CDS_4468	threonine-type endopeptidase activity;
CDS_4469	DNA binding;
CDS_4470	zinc ion binding;
CDS_4473	pyridoxal phosphate binding; glycogen phosphorylase activity;
CDS_4478	histidinol-phosphate transaminase activity; pyridoxal phosphate binding;
CDS_4482	ATP binding; protein serine/threonine kinase activity;
CDS_4485	zinc ion binding; acid-amino acid ligase activity;
CDS_4490	structural constituent of ribosome;
CDS_4491	electron carrier activity; protein disulfide oxidoreductase activity;
CDS_4492	RNA binding; exoribonuclease II activity;
CDS_4497	zinc ion binding;
CDS_4502	zinc ion binding;
CDS_4508	imidazoleglycerol-phosphate dehydratase activity;
CDS_4509	transferase activity, transferring hexosyl groups;
CDS_4511	cyclin-dependent protein serine/threonine kinase inhibitor activity;
CDS_4513	ATP binding; protein serine/threonine kinase activity;
CDS_4518	omega peptidase activity;
CDS_4519	structural constituent of ribosome; rRNA binding;
CDS_4521	carbon-nitrogen ligase activity, with glutamine as amido-N-donor; transferase activity;
CDS_4523	sequence-specific DNA binding transcription factor activity; transcription regulatory region sequence-specific DNA binding;
CDS_4524	transferase activity, transferring hexosyl groups;
CDS_4525	GTP binding;
CDS_4526	serine-type peptidase activity;
CDS_4527	oxidoreductase activity; nucleotide binding;
CDS_4532	nucleotidyltransferase activity;
CDS_4536	transferase activity, transferring acyl groups other than amino-acyl groups;
CDS_4539	structural constituent of ribosome; RNA binding;
CDS_4543	substrate-specific transmembrane transporter activity;
CDS_4544	fumarylacetoacetase activity;
CDS_4545	ARF GTPase activator activity; zinc ion binding;
CDS_4550	methyltransferase activity;
CDS_4552	NADP binding; phosphogluconate dehydrogenase (decarboxylating) activity;
CDS_4554	oxidoreductase activity, acting on paired donors, with incorporation or reduction of molecular oxygen, 2-oxoglutarate as one donor, and incorporation of one atom each of oxygen into both donors;
CDS_4567	protein dimerization activity;
CDS_4568	protein dimerization activity;
CDS_4570	structural constituent of ribosome;
CDS_4572	GTP binding;
CDS_4574	translation elongation factor activity;
CDS_4580	sequence-specific DNA binding transcription factor activity; sequence-specific DNA binding;
CDS_4584	kinase activity;
CDS_4585	RNA binding;
CDS_4586	ATP binding; protein serine/threonine kinase activity;
CDS_4593	nucleotide binding; coenzyme binding; catalytic activity;
CDS_4600	nucleic acid binding; ATP binding; ATP-dependent helicase activity;
CDS_4603	ATP binding; unfolded protein binding;
CDS_4606	RNA binding; nucleotide binding;
CDS_4609	SNAP receptor activity;
CDS_4613	cellulose synthase (UDP-forming) activity; zinc ion binding;
CDS_4614	actin binding;
CDS_4618	DNA binding;
CDS_4620	protein domain specific binding;
CDS_4622	transferase activity, transferring glycosyl groups;
CDS_4623	transferase activity, transferring glycosyl groups;
CDS_4625	hydrolase activity, hydrolyzing O-glycosyl compounds; cation binding; glycogen debranching enzyme activity;
CDS_4630	structural constituent of ribosome;
CDS_4632	DNA-directed RNA polymerase activity; RNA binding;
CDS_4633	uracil phosphoribosyltransferase activity;
CDS_4634	isomerase activity;
CDS_4635	nucleic acid binding; nucleotide binding;
CDS_4636	ATP binding; protein serine/threonine kinase activity;
CDS_4637	cysteine-type peptidase activity;
CDS_4639	ATP binding; unfolded protein binding;
CDS_4640	threonine-type endopeptidase activity;
CDS_4642	oxidoreductase activity, acting on the aldehyde or oxo group of donors, NAD or NADP as acceptor;
CDS_4646	lysine-tRNA ligase activity; ATP binding;
CDS_4647	kinase activity; cyclin-dependent protein serine/threonine kinase regulator activity;
CDS_4648	zinc ion binding;
CDS_4655	NADP binding; glutamyl-tRNA reductase activity;
CDS_4658	structural constituent of ribosome; RNA binding;
CDS_4662	GTP binding;
CDS_4669	protein heterodimerization activity;
CDS_4674	calcium ion binding; ATP binding; protein serine/threonine kinase activity;
CDS_4675	transferase activity;
CDS_4676	cysteine-type peptidase activity;
CDS_4681	electron carrier activity; protein disulfide oxidoreductase activity;
CDS_4683	cysteine-type peptidase activity; ubiquitin thiolesterase activity;
CDS_4688	iron ion binding; lipoxygenase activity;
CDS_4689	threonine-type endopeptidase activity;
CDS_4693	phospholipid binding;
CDS_4694	ribonuclease H activity; RNA-directed DNA polymerase activity; RNA binding; aspartic-type endopeptidase activity;
CDS_4695	hydrolase activity, hydrolyzing O-glycosyl compounds; cation binding; 1,4-alpha-glucan branching enzyme activity;
CDS_4703	RNA binding;
CDS_4706	ATP binding; protein serine/threonine kinase activity;
CDS_4707	ATP binding; protein serine/threonine kinase activity;
CDS_4708	ATP binding; protein serine/threonine kinase activity;
CDS_4710	zinc ion binding;
CDS_4714	tryptophan-tRNA ligase activity; ATP binding;
CDS_4718	oxidoreductase activity; FMN binding;
CDS_4727	ATP binding; ATPase activity;
CDS_4730	ATP binding; protein serine/threonine kinase activity;
CDS_4733	oxidoreductase activity, acting on the aldehyde or oxo group of donors, NAD or NADP as acceptor; proline dehydrogenase activity; sequence-specific DNA binding transcription factor activity; 1-pyrroline-5-carboxylate dehydrogenase activity;
CDS_4734	nucleic acid binding; ATP binding; ATP-dependent helicase activity;
CDS_4736	ubiquitin-protein ligase activity; zinc ion binding;
CDS_4737	ATP binding; protein serine/threonine kinase activity;
CDS_4738	ATP binding; protein serine/threonine kinase activity;
CDS_4740	ATPase activity, coupled to transmembrane movement of substances; ATP binding;
CDS_4741	syntaxin binding;
CDS_4742	methylenetetrahydrofolate dehydrogenase (NADP+) activity; nucleotide binding;
CDS_4746	oxidoreductase activity; nucleotide binding; zinc ion binding;
CDS_4747	oxidoreductase activity; nucleotide binding; zinc ion binding;
CDS_4749	squalene monooxygenase activity; flavin adenine dinucleotide binding;
CDS_4750	iron ion binding; oxidoreductase activity, acting on paired donors, with incorporation or reduction of molecular oxygen, 2-oxoglutarate as one donor, and incorporation of one atom each of oxygen into both donors;
CDS_4752	ATP binding;
CDS_4753	glycolipid transporter activity; glycolipid binding;
CDS_4757	4 iron, 4 sulfur cluster binding; transferase activity;
CDS_4762	inositol pentakisphosphate 2-kinase activity; ATP binding;
CDS_4763	ATP binding;
CDS_4765	zinc ion binding; ligase activity;
CDS_4767	nucleic acid binding;
CDS_4769	chorismate mutase activity;
CDS_4772	ATP binding; protein serine/threonine kinase activity;
CDS_4774	nucleotide binding; dTDP-4-dehydrorhamnose reductase activity;
CDS_4776	acid phosphatase activity;
CDS_4777	catalytic activity; magnesium ion binding; thiamine pyrophosphate binding;
CDS_4781	sequence-specific DNA binding transcription factor activity; sequence-specific DNA binding; zinc ion binding;
CDS_4782	RNA polymerase II transcription cofactor activity;
CDS_4784	transferase activity;
CDS_4785	cytochrome-c oxidase activity;
CDS_4786	nucleic acid binding; ATP binding; ATP-dependent helicase activity;
CDS_4788	protein transporter activity;
CDS_4795	heme binding; oxidoreductase activity, acting on paired donors, with incorporation or reduction of molecular oxygen; iron ion binding; electron carrier activity;
CDS_4798	L-ascorbic acid binding; iron ion binding; oxidoreductase activity, acting on paired donors, with incorporation or reduction of molecular oxygen, 2-oxoglutarate as one donor, and incorporation of one atom each of oxygen into both donors;
CDS_4800	phosphoprotein phosphatase activity; metal ion binding;
CDS_4805	hydrolase activity;
CDS_4810	zinc ion binding; DNA binding;
CDS_4812	ubiquitin-ubiquitin ligase activity;
CDS_4815	methyltransferase activity;
CDS_4824	carbohydrate binding; galactosyltransferase activity;
CDS_4825	ATP binding; protein serine/threonine kinase activity;
CDS_4830	ATP binding; catalytic activity;
CDS_4834	nickel cation binding; urease activity;
CDS_4835	nucleic acid binding; hydrolase activity; nucleotide binding;
CDS_4836	heterocyclic compound binding; organic cyclic compound binding; catalytic activity;
CDS_4842	transferase activity, transferring glycosyl groups;
CDS_4843	ATP binding; protein serine/threonine kinase activity;
CDS_4846	carbohydrate binding; hydrolase activity, hydrolyzing O-glycosyl compounds;
CDS_4850	flavin adenine dinucleotide binding; UDP-N-acetylmuramate dehydrogenase activity;
CDS_4853	aminoacylase activity; metallopeptidase activity;
CDS_4854	transferase activity, transferring glycosyl groups;
CDS_4858	zinc ion binding;
CDS_4861	hydrogen ion transmembrane transporter activity; lipid binding;
CDS_4864	ATP binding; protein serine/threonine kinase activity;
CDS_4866	nucleotidyltransferase activity;
CDS_4867	serine-type endopeptidase activity;
CDS_4868	protein transporter activity;
CDS_4869	zinc ion binding; nucleic acid binding;
CDS_4870	protein kinase activity; ATP binding;
CDS_4881	zinc ion binding; nucleic acid binding;
CDS_4882	alpha-N-arabinofuranosidase activity;
CDS_4885	citrate (Si)-synthase activity;
CDS_4886	rRNA binding;
CDS_4887	zinc ion binding;
CDS_4889	transition metal ion binding; acyl-[acyl-carrier-protein] desaturase activity;
CDS_4896	ATP binding;
CDS_4898	DNA binding;
CDS_4902	small protein activating enzyme activity; acid-amino acid ligase activity; ATP binding;
CDS_4905	phosphotransferase activity, alcohol group as acceptor; ATP binding;
CDS_4910	DNA binding;
CDS_4912	protein heterodimerization activity; sequence-specific DNA binding;
CDS_4918	pyridoxal phosphate binding; transaminase activity;
CDS_4919	methyltransferase activity;
CDS_4921	nucleotide binding;
CDS_4922	nucleic acid binding; nucleotide binding;
CDS_4923	nucleotide binding;
CDS_4925	methyltransferase activity;
CDS_4926	ARF GTPase activator activity; zinc ion binding;
CDS_4927	ribokinase activity;
CDS_4929	structural constituent of ribosome; rRNA binding;
CDS_4931	protein kinase activity; ATP binding;
CDS_4939	zinc ion binding;
CDS_4944	zinc ion binding;
CDS_4946	P-P-bond-hydrolysis-driven protein transmembrane transporter activity;
CDS_4947	P-P-bond-hydrolysis-driven protein transmembrane transporter activity;
CDS_4948	ubiquitin-protein ligase activity;
CDS_4950	ATP binding; protein serine/threonine kinase activity;
CDS_4951	catalytic activity;
CDS_4952	metal ion binding; nickel cation transmembrane transporter activity; cobalt ion transmembrane transporter activity;
CDS_4953	ubiquitin-protein ligase activity;
CDS_4954	ATP binding; protein serine/threonine kinase activity;
CDS_4955	sequence-specific DNA binding transcription factor activity; sequence-specific DNA binding;
CDS_4963	voltage-gated potassium channel activity;
CDS_4964	glutamine-tRNA ligase activity; ATP binding;
CDS_4965	structural constituent of ribosome;
CDS_4966	DNA binding;
CDS_4967	transferase activity, transferring glycosyl groups;
CDS_4972	translation initiation factor activity; translation elongation factor activity; ribosome binding;
CDS_4973	zinc ion binding; nucleic acid binding;
CDS_4977	nucleic acid binding; ATP binding; ATP-dependent helicase activity;
CDS_4982	peptidase activity;
CDS_4986	hydrolase activity, acting on carbon-nitrogen (but not peptide) bonds, in linear amides;
CDS_4987	electron carrier activity; iron ion binding; heme binding; cytochrome-c oxidase activity;
CDS_4998	5'-3' exoribonuclease activity; nucleic acid binding; zinc ion binding;
CDS_4999	5'-3' exoribonuclease activity; nucleic acid binding; zinc ion binding;
CDS_5005	peptidyl-prolyl cis-trans isomerase activity;
CDS_5007	nucleic acid binding;
CDS_5010	amino acid binding;
CDS_5011	hydrolase activity;
CDS_5013	oxidoreductase activity; nucleotide binding; zinc ion binding;
CDS_5017	catalytic activity;
CDS_5018	sequence-specific DNA binding transcription factor activity; DNA binding;
CDS_5019	riboflavin kinase activity; hydrolase activity;
CDS_5020	homoserine kinase activity; ATP binding;
CDS_5021	hydrolase activity, acting on ester bonds;
CDS_5026	DNA binding; nuclease activity;
CDS_5028	zinc ion binding;
CDS_5030	DNA-directed RNA polymerase activity;
CDS_5042	zinc ion binding;
CDS_5051	sequence-specific DNA binding transcription factor activity; sequence-specific DNA binding;
CDS_5054	phosphorelay response regulator activity; ATP binding; phosphorelay sensor kinase activity;
CDS_5059	structural constituent of ribosome;
CDS_5060	transferase activity, transferring acyl groups;
CDS_5063	threonine-type endopeptidase activity;
CDS_5064	threonine-type endopeptidase activity;
CDS_5066	inorganic diphosphatase activity; hydrogen-translocating pyrophosphatase activity;
CDS_5076	zinc ion binding; nucleic acid binding;
CDS_5082	chaperone binding; adenyl-nucleotide exchange factor activity; protein homodimerization activity;
CDS_5085	oxidoreductase activity; nucleotide binding;
CDS_5088	structural molecule activity;
CDS_5089	hydrolase activity, hydrolyzing O-glycosyl compounds; xyloglucan:xyloglucosyl transferase activity;
CDS_5090	transferase activity, transferring glycosyl groups; hydrolase activity;
CDS_5091	voltage-gated potassium channel activity;
CDS_5096	transferase activity, transferring hexosyl groups;
CDS_5097	transferase activity, transferring pentosyl groups;
CDS_5100	zinc ion binding;
CDS_5101	3'(2'),5'-bisphosphate nucleotidase activity;
CDS_5104	methylmalonate-semialdehyde dehydrogenase (acylating) activity;
CDS_5106	carbohydrate binding; galactosyltransferase activity;
CDS_5110	oxidoreductase activity;
CDS_5112	GTP binding;
CDS_5114	aldehyde dehydrogenase [NAD(P)+] activity;
CDS_5115	hydrolase activity, acting on ester bonds;
CDS_5119	cation-transporting ATPase activity; metal ion binding; ATP binding;
CDS_5123	pyridoxal phosphate binding; catalytic activity;
CDS_5125	ATP binding; protein homodimerization activity; photoreceptor activity; phosphorelay sensor kinase activity;
CDS_5128	sequence-specific DNA binding;
CDS_5132	extracellular ligand-gated ion channel activity; ribonuclease P activity;
CDS_5136	ATP binding; unfolded protein binding;
CDS_5144	ATPase activity, coupled to transmembrane movement of substances; ATP binding;
CDS_5153	hydrolase activity; phosphotransferase activity, alcohol group as acceptor;
CDS_5155	coproporphyrinogen oxidase activity; protein homodimerization activity;
CDS_5157	adenylate kinase activity; ATP binding;
CDS_5160	acetylglucosaminyltransferase activity;
CDS_5162	transporter activity;
CDS_5163	zinc ion binding; DNA binding;
CDS_5165	triglyceride lipase activity;
CDS_5167	7S RNA binding;
CDS_5168	nucleic acid binding; nucleotide binding;
CDS_5169	sequence-specific DNA binding;
CDS_5170	zinc ion binding; nucleic acid binding;
CDS_5171	DNA binding; chromatin binding; phosphorelay response regulator activity;
CDS_5172	DNA binding; chromatin binding; phosphorelay response regulator activity;
CDS_5173	racemase and epimerase activity, acting on carbohydrates and derivatives;
CDS_5175	cysteine-type endopeptidase activity;
CDS_5176	calcium ion binding;
CDS_5180	cyclin-dependent protein serine/threonine kinase activity; RNA polymerase II carboxy-terminal domain kinase activity; ATP binding;
CDS_5197	cysteine-type peptidase activity; ubiquitin thiolesterase activity;
CDS_5198	cysteine-type peptidase activity; ubiquitin thiolesterase activity;
CDS_5202	ATPase activity, coupled to transmembrane movement of substances; ATP binding;
CDS_5204	metal ion binding; metalloendopeptidase activity;
CDS_5207	zinc ion binding;
CDS_5210	structural constituent of ribosome;
CDS_5211	oxidoreductase activity; nucleotide binding; zinc ion binding;
CDS_5213	structural molecule activity;
CDS_5217	RNA binding;
CDS_5218	hydrolase activity;
CDS_5220	structural constituent of ribosome;
CDS_5226	zinc ion binding;
CDS_5227	pyridoxal phosphate binding; transaminase activity;
CDS_5228	ATP binding; hydrolase activity, acting on acid anhydrides, in phosphorus-containing anhydrides;
CDS_5230	nucleic acid binding;
CDS_5232	nucleotidyltransferase activity;
CDS_5235	nucleotide binding; L-malate dehydrogenase activity;
CDS_5237	nucleic acid binding; nucleotide binding;
CDS_5239	structural constituent of ribosome;
CDS_5244	protein transporter activity;
CDS_5245	acetylglucosaminyltransferase activity;
CDS_5248	ubiquitin thiolesterase activity; zinc ion binding;
CDS_5251	ATP binding; protein serine/threonine kinase activity;
CDS_5253	phosphorelay response regulator activity;
CDS_5256	endonuclease activity; RNA-directed DNA polymerase activity; RNA binding;
CDS_5260	7S RNA binding;
CDS_5262	chalcone isomerase activity;
CDS_5271	hydrolase activity, hydrolyzing O-glycosyl compounds;
CDS_5273	ATP binding;
CDS_5276	oxidoreductase activity, acting on paired donors, with incorporation or reduction of molecular oxygen; iron ion binding; 2 iron, 2 sulfur cluster binding; chlorophyllide a oxygenase [overall] activity;
CDS_5277	DNA-directed DNA polymerase activity; DNA binding; 3'-5' exonuclease activity;
CDS_5279	protein kinase activity; ATP binding;
CDS_5288	transition metal ion binding; acyl-[acyl-carrier-protein] desaturase activity;
CDS_5290	DNA photolyase activity;
CDS_5296	NAD+ binding; 3-hydroxyacyl-CoA dehydrogenase activity;
CDS_5298	DNA binding;
CDS_5304	hydrolase activity;
CDS_5309	methyltransferase activity;
CDS_5311	metal ion binding;
CDS_5312	ATP binding; protein serine/threonine kinase activity;
[truncated: 10,559 more rows]
